# Supplementary material for: RNA Modification-Related Genetic Variants in Genomic Loci Associated with Bone Mineral Density and Fracture
Source: MDPI journal article supplement (doi:10.3390/genes13101892), 2022-10-18
Supplement: s1 [file s1]

Supplementary Table S1 RNAm\_SNPs identified for eBMD and fracture

| SNP        | rm_id            | Modification type | CHR | Position | Gene      | Gene region | Confidence level     | Modification function | Allele1 | Allele2 | Allele1 freq | beta    | se     | P value  | Trait |
|------------|------------------|-------------------|-----|----------|-----------|-------------|----------------------|-----------------------|---------|---------|--------------|---------|--------|----------|-------|
| rs7513688  | RMVar_ID_1594463 | m7G               | 1   | 6592685  | KLHL21    | 3_UTR       | MeRIP-seq:(Medium)   | Functional Loss       | G       | A       | 0.6399       | -0.0152 | 0.0019 | 1.30E-12 | eBMD  |
| rs7513688  | RMVar_ID_1559152 | m7G               | 1   | 6592685  | KLHL21    | 3_UTR       | MeRIP-seq:(Medium)   | Functional Loss       | G       | A       | 0.6399       | -0.0152 | 0.0019 | 1.30E-12 | eBMD  |
| rs3174820  | RMVar_ID_67234   | m1A               | 1   | 6633037  | THAP3     | CDS         | m1A-quant-seq:(High) | Functional Loss       | A       | G       | 0.6501       | 0.0183  | 0.0019 | 1.30E-20 | eBMD  |
| rs3174820  | RMVar_ID_110926  | m1A               | 1   | 6633037  | THAP3     | CDS         | m1A-quant-seq:(High) | Functional Loss       | A       | G       | 0.6501       | 0.0183  | 0.0019 | 1.30E-20 | eBMD  |
| rs2294532  | RMVar_ID_747267  | m6A               | 1   | 6634866  | THAP3     | 3_UTR       | miCLIP:(High)        | Functional Loss       | C       | T       | 0.6675       | -0.0166 | 0.0019 | 2.30E-14 | eBMD  |
| rs2294532  | RMVar_ID_270567  | m6A               | 1   | 6634866  | DNAJC11   | 3_UTR       | miCLIP:(High)        | Functional Loss       | C       | T       | 0.6675       | -0.0166 | 0.0019 | 2.30E-14 | eBMD  |
| rs2791649  | RMVar_ID_1143645 | m6A               | 1   | 11072504 | EXOSC10   | intron      | Prediction:(Low)     | Functional Loss       | A       | G       | 0.2547       | -0.0188 | 0.0021 | 2.20E-14 | eBMD  |
| rs11121702 | RMVar_ID_1143791 | m6A               | 1   | 11233087 | MTOR      | intron      | Prediction:(Low)     | Functional Gain       | C       | T       | 0.2681       | -0.0180 | 0.0021 | 1.20E-12 | eBMD  |
| rs1048334  | RMVar_ID_1161447 | m6A               | 1   | 16014263 | HSPB7     | 3_UTR       | Prediction:(Low)     | Functional Loss       | T       | C       | 0.4101       | 0.0106  | 0.0019 | 1.40E-08 | eBMD  |
| rs1048334  | RMVar_ID_1161446 | m6A               | 1   | 16014263 | HSPB7     | 3_UTR       | Prediction:(Low)     | Functional Loss       | T       | C       | 0.4101       | 0.0106  | 0.0019 | 1.40E-08 | eBMD  |
| rs1048238  | RMVar_ID_1161454 | m6A               | 1   | 16015152 | HSPB7     | 3_UTR       | Prediction:(Low)     | Functional Loss       | C       | T       | 0.4284       | 0.0113  | 0.0019 | 4.10E-09 | eBMD  |
| rs1048238  | RMVar_ID_1161453 | m6A               | 1   | 16015152 | HSPB7     | 3_UTR       | Prediction:(Low)     | Functional Loss       | C       | T       | 0.4284       | 0.0113  | 0.0019 | 4.10E-09 | eBMD  |
| rs1739842  | RMVar_ID_758070  | m6A               | 1   | 16016353 | HSPB7     | intron      | m6A-Label-seq:(High) | Functional Loss       | T       | G       | 0.4100       | 0.0106  | 0.0019 | 1.60E-08 | eBMD  |
| rs1739842  | RMVar_ID_232460  | m6A               | 1   | 16016353 | HSPB7     | intron      | m6A-Label-seq:(High) | Functional Loss       | T       | G       | 0.4100       | 0.0106  | 0.0019 | 1.60E-08 | eBMD  |
| rs3738097  | RMVar_ID_758148  | m6A               | 1   | 21568323 | ALPL      | intron      | m6A-Label-seq:(High) | Functional Loss       | T       | C       | 0.8870       | 0.0188  | 0.0029 | 7.60E-10 | eBMD  |
| rs3738097  | RMVar_ID_234240  | m6A               | 1   | 21568323 | ALPL      | intron      | m6A-Label-seq:(High) | Functional Loss       | T       | C       | 0.8870       | 0.0188  | 0.0029 | 7.60E-10 | eBMD  |
| rs3200255  | RMVar_ID_63734   | m1A               | 1   | 21573678 | ALPL      | CDS         | m1A-quant-seq:(High) | Functional Loss       | A       | G       | 0.8819       | 0.0171  | 0.0028 | 1.40E-08 | eBMD  |
| rs3200255  | RMVar_ID_63733   | m1A               | 1   | 21573678 | ALPL      | CDS         | m1A-quant-seq:(High) | Functional Loss       | A       | G       | 0.8819       | 0.0171  | 0.0028 | 1.40E-08 | eBMD  |
| rs3200255  | RMVar_ID_110981  | m1A               | 1   | 21573678 | ALPL      | CDS         | m1A-quant-seq:(High) | Functional Loss       | A       | G       | 0.8819       | 0.0171  | 0.0028 | 1.40E-08 | eBMD  |
| rs3820687  | RMVar_ID_63784   | m1A               | 1   | 22030736 | LINC00339 | exon        | m1A-quant-seq:(High) | Functional Loss       | A       | T       | 0.7763       | 0.0275  | 0.0022 | 6.10E-30 | eBMD  |
| rs2056975  | RMVar_ID_9388    | A-to-I            | 1   | 22082034 | CDC42     | intron      | RNA-Seq:(High)       | Functional Loss       | A       | G       | 0.0678       | 0.0381  | 0.0036 | 2.50E-19 | eBMD  |
| rs2056975  | RMVar_ID_9389    | A-to-I            | 1   | 22082034 | CDC42     | intron      | RNA-Seq:(High)       | Functional Loss       | A       | G       | 0.0678       | 0.0381  | 0.0036 | 2.50E-19 | eBMD  |
| rs2056975  | RMVar_ID_52301   | A-to-I            | 1   | 22082034 | CDC42     | intron      | RNA-Seq:(High)       | Functional Loss       | A       | G       | 0.0678       | 0.0381  | 0.0036 | 2.50E-19 | eBMD  |
| rs7536301  | RMVar_ID_234383  | m6A               | 1   | 22128486 | WNT4      | intron      | m6A-Label-seq:(High) | Functional Loss       | T       | C       | 0.0792       | 0.0393  | 0.0034 | 1.50E-22 | eBMD  |
| rs7536301  | RMVar_ID_234382  | m6A               | 1   | 22128486 | WNT4      | intron      | m6A-Label-seq:(High) | Functional Loss       | T       | C       | 0.0792       | 0.0393  | 0.0034 | 1.50E-22 | eBMD  |
| rs7536301  | RMVar_ID_757882  | m6A               | 1   | 22128486 | WNT4      | intron      | m6A-Label-seq:(High) | Functional Loss       | T       | C       | 0.0792       | 0.0393  | 0.0034 | 1.50E-22 | eBMD  |
| rs760093   | RMVar_ID_236350  | m6A               | 1   | 26854937 | ZDHHC18   | 3_UTR       | MeRIP-seq:(Medium)   | Functional Loss       | G       | A       | 0.7597       | 0.0134  | 0.0021 | 1.30E-08 | eBMD  |
| rs3010110  | RMVar_ID_754898  | m6A               | 1   | 26952031 | KDF1      | CDS         | miCLIP:(High)        | Functional Loss       | G       | A       | 0.7390       | 0.0136  | 0.0021 | 9.30E-10 | eBMD  |
| rs3010110  | RMVar_ID_236491  | m6A               | 1   | 26952031 | KDF1      | CDS         | miCLIP:(High)        | Functional Loss       | G       | A       | 0.7390       | 0.0136  | 0.0021 | 9.30E-10 | eBMD  |
| rs11209342 | RMVar_ID_1188132 | m6A               | 1   | 41003994 | CTPS1     | intron      | Prediction:(Low)     | Functional Loss       | A       | C       | 0.5644       | 0.0118  | 0.0018 | 1.80E-09 | eBMD  |
| rs11555079 | RMVar_ID_1188212 | m6A               | 1   | 41028081 | SCMH1     | 3_UTR       | Prediction:(Low)     | Functional Gain       | G       | A       | 0.7802       | 0.0182  | 0.0022 | 5.10E-13 | eBMD  |

|            |                  |     |   |           |             |        |                      |                 |   |   |        |         |        |          |      |
|------------|------------------|-----|---|-----------|-------------|--------|----------------------|-----------------|---|---|--------|---------|--------|----------|------|
| rs10489522 | RMVar_ID_499449  | m6A | 1 | 41038770  | SCMH1       | intron | m6A-Label-seq:(High) | Functional Loss | T | A | 0.2205 | -0.0182 | 0.0022 | 6.80E-13 | eBMD |
| rs213733   | RMVar_ID_756996  | m6A | 1 | 41111317  | SCMH1       | intron | m6A-Label-seq:(High) | Functional Loss | T | C | 0.4365 | -0.0119 | 0.0018 | 1.20E-09 | eBMD |
| rs213733   | RMVar_ID_499459  | m6A | 1 | 41111317  | SCMH1       | intron | m6A-Label-seq:(High) | Functional Loss | T | C | 0.4365 | -0.0119 | 0.0018 | 1.20E-09 | eBMD |
| rs12125555 | RMVar_ID_110877  | m1A | 1 | 41241439  | SCMH1       | intron | MeRIP-seq:(Medium)   | Functional Loss | A | G | 0.5634 | 0.0121  | 0.0018 | 9.70E-10 | eBMD |
| rs12125555 | RMVar_ID_88490   | m1A | 1 | 41241439  | SCMH1       | intron | MeRIP-seq:(Medium)   | Functional Loss | A | G | 0.5634 | 0.0121  | 0.0018 | 9.70E-10 | eBMD |
| rs12044635 | RMVar_ID_278687  | m6A | 1 | 68189093  | WLS         | intron | m6A-Label-seq:(High) | Functional Loss | T | G | 0.8954 | -0.0377 | 0.0030 | 1.20E-28 | eBMD |
| rs12044635 | RMVar_ID_755584  | m6A | 1 | 68189093  | WLS         | intron | m6A-Label-seq:(High) | Functional Loss | T | G | 0.8954 | -0.0377 | 0.0030 | 1.20E-28 | eBMD |
| rs430600   | RMVar_ID_1196572 | m6A | 1 | 88760316  | PKN2        | CDS    | Prediction:(Low)     | Functional Gain | T | C | 0.3846 | 0.0187  | 0.0019 | 2.60E-15 | eBMD |
| rs6673179  | RMVar_ID_261256  | m6A | 1 | 88950833  | KYAT3       | intron | m6A-Label-seq:(High) | Functional Loss | T | C | 0.4988 | -0.0139 | 0.0018 | 2.20E-09 | eBMD |
| rs10922710 | RMVar_ID_1196902 | m6A | 1 | 89762147  | LOC10192795 | exon   | Prediction:(Low)     | Functional Gain | T | C | 0.7857 | 0.0124  | 0.0022 | 2.80E-09 | eBMD |
| rs6603979  | RMVar_ID_636642  | m6A | 1 | 92513797  | EVI5        | CDS    | MeRIP-seq:(Medium)   | Functional Loss | A | G | 0.2068 | 0.0136  | 0.0023 | 5.30E-10 | eBMD |
| rs6603979  | RMVar_ID_748158  | m6A | 1 | 92513797  | EVI5        | CDS    | MeRIP-seq:(Medium)   | Functional Loss | A | G | 0.2068 | 0.0136  | 0.0023 | 5.30E-10 | eBMD |
| rs910697   | RMVar_ID_314267  | m6A | 1 | 112520504 | WNT2B       | CDS    | MeRIP-seq:(Medium)   | Functional Loss | A | G | 0.5372 | -0.0141 | 0.0018 | 2.70E-13 | eBMD |
| rs6682737  | RMVar_ID_314269  | m6A | 1 | 112593607 | ST7L        | intron | m6A-Label-seq:(High) | Functional Loss | T | C | 0.5260 | -0.0147 | 0.0018 | 1.10E-13 | eBMD |
| rs2974935  | RMVar_ID_1156287 | m6A | 1 | 155212058 | MTX1        | intron | Prediction:(Low)     | Functional Loss | G | T | 0.4918 | 0.0114  | 0.0018 | 3.90E-10 | eBMD |
| rs2230471  | RMVar_ID_752381  | m6A | 1 | 172442356 | C1orf105    | intron | MeRIP-seq:(Medium)   | Functional Loss | A | G | 0.1741 | -0.0181 | 0.0024 | 1.00E-10 | eBMD |
| rs2230471  | RMVar_ID_644509  | m6A | 1 | 172442356 | C1orf105    | intron | MeRIP-seq:(Medium)   | Functional Loss | A | G | 0.1741 | -0.0181 | 0.0024 | 1.00E-10 | eBMD |
| rs4511180  | RMVar_ID_1174097 | m6A | 1 | 202180311 | PTPRVP      | exon   | Prediction:(Low)     | Functional Loss | A | G | 0.4072 | -0.0112 | 0.0019 | 5.40E-10 | eBMD |
| rs2057044  | RMVar_ID_1177106 | m6A | 1 | 210304207 | RNASEH1P3   | exon   | Prediction:(Low)     | Functional Loss | A | T | 0.8320 | -0.0250 | 0.0025 | 3.90E-19 | eBMD |
| rs4333855  | RMVar_ID_661468  | m6A | 1 | 219308124 | LYPLAL1     | intron | m6A-Label-seq:(High) | Functional Loss | T | C | 0.6980 | 0.0184  | 0.0020 | 2.00E-13 | eBMD |
| rs4333855  | RMVar_ID_753810  | m6A | 1 | 219308124 | LYPLAL1     | intron | m6A-Label-seq:(High) | Functional Loss | T | C | 0.6980 | 0.0184  | 0.0020 | 2.00E-13 | eBMD |
| rs1061160  | RMVar_ID_661525  | m6A | 1 | 219981425 | EPRS        | CDS    | DART-seq:(High)      | Functional Loss | C | T | 0.6516 | 0.0151  | 0.0019 | 4.80E-13 | eBMD |
| rs1061160  | RMVar_ID_757929  | m6A | 1 | 219981425 | EPRS        | CDS    | DART-seq:(High)      | Functional Loss | C | T | 0.6516 | 0.0151  | 0.0019 | 4.80E-13 | eBMD |
| rs12120116 | RMVar_ID_754643  | m6A | 1 | 221307416 | LOC10537293 | exon   | m6A-Label-seq:(High) | Functional Loss | A | T | 0.4791 | 0.0173  | 0.0018 | 1.10E-13 | eBMD |
| rs12120116 | RMVar_ID_661810  | m6A | 1 | 221307416 | LOC10537293 | exon   | m6A-Label-seq:(High) | Functional Loss | A | T | 0.4791 | 0.0173  | 0.0018 | 1.10E-13 | eBMD |
| rs12758915 | RMVar_ID_86097   | m1A | 1 | 226870643 | PSEN2       | intron | m1A-IP-seq:(High)    | Functional Loss | A | G | 0.5176 | 0.0141  | 0.0018 | 1.60E-12 | eBMD |
| rs12758915 | RMVar_ID_86098   | m1A | 1 | 226870643 | PSEN2       | intron | m1A-IP-seq:(High)    | Functional Loss | A | G | 0.5176 | 0.0141  | 0.0018 | 1.60E-12 | eBMD |
| rs12758915 | RMVar_ID_110554  | m1A | 1 | 226870643 | PSEN2       | intron | m1A-IP-seq:(High)    | Functional Loss | A | G | 0.5176 | 0.0141  | 0.0018 | 1.60E-12 | eBMD |
| rs2295994  | RMVar_ID_1180152 | m6A | 1 | 227735215 | JMJD4       | CDS    | Prediction:(Low)     | Functional Loss | A | C | 0.5836 | 0.0109  | 0.0019 | 2.70E-09 | eBMD |
| rs1591529  | RMVar_ID_589895  | m6A | 1 | 240374067 | FMN2        | intron | m6A-Label-seq:(High) | Functional Loss | A | T | 0.5530 | -0.0127 | 0.0018 | 2.90E-09 | eBMD |
| rs1591529  | RMVar_ID_756611  | m6A | 1 | 240374067 | FMN2        | intron | m6A-Label-seq:(High) | Functional Loss | A | T | 0.5530 | -0.0127 | 0.0018 | 2.90E-09 | eBMD |
| rs15380    | RMVar_ID_389148  | m6A | 2 | 10057143  | CYS1        | 3_UTR  | m6A-Label-seq:(High) | Functional Loss | T | A | 0.2066 | -0.0171 | 0.0023 | 2.30E-10 | eBMD |
| rs4233729  | RMVar_ID_503463  | m6A | 2 | 28869813  | TRMT61B     | CDS    | miCLIP:(High)        | Functional Loss | T | C | 0.5727 | -0.0149 | 0.0018 | 1.70E-12 | eBMD |
| rs4233729  | RMVar_ID_810740  | m6A | 2 | 28869813  | TRMT61B     | CDS    | miCLIP:(High)        | Functional Loss | T | C | 0.5727 | -0.0149 | 0.0018 | 1.70E-12 | eBMD |
| rs72800775 | RMVar_ID_735343  | m6A | 2 | 54152457  | ACYP2       | intron | m6A-Label-seq:(High) | Functional Loss | T | A | 0.8613 | 0.0204  | 0.0026 | 7.90E-11 | eBMD |

|             |                  |        |   |           |             |        |                      |                 |   |   |        |         |        |          |      |
|-------------|------------------|--------|---|-----------|-------------|--------|----------------------|-----------------|---|---|--------|---------|--------|----------|------|
| rs72800775  | RMVar_ID_815404  | m6A    | 2 | 54152457  | ACYP2       | intron | m6A-Label-seq:(High) | Functional Loss | T | A | 0.8613 | 0.0204  | 0.0026 | 7.90E-11 | eBMD |
| rs2229503   | RMVar_ID_735442  | m6A    | 2 | 54631526  | SPTBN1      | CDS    | MeRIP-seq:(Medium)   | Functional Loss | C | T | 0.8116 | -0.0395 | 0.0023 | 1.70E-50 | eBMD |
| rs2229503   | RMVar_ID_818132  | m6A    | 2 | 54631526  | SPTBN1      | CDS    | MeRIP-seq:(Medium)   | Functional Loss | C | T | 0.8116 | -0.0395 | 0.0023 | 1.70E-50 | eBMD |
| rs2229503   | RMVar_ID_142464  | m5C    | 2 | 54631527  | SPTBN1      | CDS    | BS-Seq:(High)        | Functional Loss | C | T | 0.8116 | -0.0395 | 0.0023 | 1.70E-50 | eBMD |
| rs2229503   | RMVar_ID_139877  | m5C    | 2 | 54631527  | SPTBN1      | CDS    | BS-Seq:(High)        | Functional Loss | C | T | 0.8116 | -0.0395 | 0.0023 | 1.70E-50 | eBMD |
| rs145950248 | RMVar_ID_735705  | m6A    | 2 | 55223498  | CLHC1       | intron | MeRIP-seq:(Medium)   | Functional Loss | C | G | 0.9733 | 0.0397  | 0.0058 | 2.30E-10 | eBMD |
| rs61734176  | RMVar_ID_1235219 | m6A    | 2 | 118842811 | EN1         | 3_UTR  | Prediction:(Low)     | Functional Loss | C | A | 0.8749 | 0.0212  | 0.0028 | 6.40E-12 | eBMD |
| rs12988603  | RMVar_ID_1240519 | m6A    | 2 | 159178671 | TANC1       | CDS    | Prediction:(Low)     | Functional Loss | C | T | 0.6275 | -0.0188 | 0.0019 | 2.50E-17 | eBMD |
| rs12613220  | RMVar_ID_603387  | m6A    | 2 | 175928077 | LNPk        | 3_UTR  | m6A-Label-seq:(High) | Functional Loss | T | A | 0.9236 | 0.0199  | 0.0034 | 4.30E-08 | eBMD |
| rs62187004  | RMVar_ID_603416  | m6A    | 2 | 175957517 | LNPk        | intron | m6A-Label-seq:(High) | Functional Loss | A | G | 0.9235 | 0.0200  | 0.0034 | 3.40E-08 | eBMD |
| rs711814    | RMVar_ID_1246979 | m6A    | 2 | 176104599 | LOC10798580 | DOWN   | Prediction:(Low)     | Functional Gain | T | C | 0.6686 | 0.0139  | 0.0019 | 6.40E-13 | eBMD |
| rs13032688  | RMVar_ID_194493  | m6A    | 2 | 181208637 | LINC01934   | exon   | m6A-Label-seq:(High) | Functional Loss | T | C | 0.2506 | 0.0178  | 0.0021 | 2.70E-15 | eBMD |
| rs13032688  | RMVar_ID_194494  | m6A    | 2 | 181208637 | LINC01934   | exon   | m6A-Label-seq:(High) | Functional Loss | T | C | 0.2506 | 0.0178  | 0.0021 | 2.70E-15 | eBMD |
| rs6734311   | RMVar_ID_194496  | m6A    | 2 | 181274781 | LINC01934   | exon   | m6A-Label-seq:(High) | Functional Loss | T | A | 0.3705 | 0.0130  | 0.0019 | 1.00E-09 | eBMD |
| rs6734311   | RMVar_ID_194497  | m6A    | 2 | 181274781 | LINC01934   | exon   | m6A-Label-seq:(High) | Functional Loss | T | A | 0.3705 | 0.0130  | 0.0019 | 1.00E-09 | eBMD |
| rs114693875 | RMVar_ID_86405   | m1A    | 2 | 199458729 | SATB2       | intron | m1A-quant-seq:(High) | Functional Loss | A | G | 0.8312 | 0.0254  | 0.0024 | 1.20E-22 | eBMD |
| rs114693875 | RMVar_ID_86404   | m1A    | 2 | 199458729 | SATB2       | intron | m1A-quant-seq:(High) | Functional Loss | A | G | 0.8312 | 0.0254  | 0.0024 | 1.20E-22 | eBMD |
| rs3751109   | RMVar_ID_1258973 | m6A    | 2 | 237518549 | MLPH        | CDS    | Prediction:(Low)     | Functional Loss | T | C | 0.8268 | 0.0158  | 0.0024 | 1.20E-08 | eBMD |
| rs11883500  | RMVar_ID_598703  | m6A    | 2 | 237525790 | MLPH        | CDS    | MeRIP-seq:(Medium)   | Functional Loss | C | T | 0.8281 | 0.0151  | 0.0024 | 4.80E-08 | eBMD |
| rs11883500  | RMVar_ID_812042  | m6A    | 2 | 237525790 | MLPH        | CDS    | MeRIP-seq:(Medium)   | Functional Loss | C | T | 0.8281 | 0.0151  | 0.0024 | 4.80E-08 | eBMD |
| rs11883500  | RMVar_ID_598702  | m6A    | 2 | 237525790 | MLPH        | CDS    | MeRIP-seq:(Medium)   | Functional Loss | C | T | 0.8281 | 0.0151  | 0.0024 | 4.80E-08 | eBMD |
| rs144190871 | RMVar_ID_646394  | m6A    | 3 | 33797386  | PDCD6IP     | intron | MeRIP-seq:(Medium)   | Functional Loss | A | C | 0.9885 | 0.0761  | 0.0089 | 3.80E-14 | eBMD |
| rs807936    | RMVar_ID_1300303 | m6A    | 3 | 47281004  | KIF9        | intron | Prediction:(Low)     | Functional Loss | C | T | 0.4038 | -0.0109 | 0.0020 | 1.90E-09 | eBMD |
| rs807931    | RMVar_ID_1300351 | m6A    | 3 | 47347825  | KLHL18      | DOWN   | Prediction:(Low)     | Functional Gain | C | T | 0.4041 | -0.0111 | 0.0020 | 1.40E-09 | eBMD |
| rs6442112   | RMVar_ID_87095   | m1A    | 3 | 48274544  | ZNF589      | DOWN   | m1A-quant-seq:(High) | Functional Loss | A | G | 0.2634 | -0.0140 | 0.0021 | 9.70E-09 | eBMD |
| rs6442112   | RMVar_ID_113498  | m1A    | 3 | 48274544  | ZNF589      | DOWN   | m1A-quant-seq:(High) | Functional Loss | A | G | 0.2634 | -0.0140 | 0.0021 | 9.70E-09 | eBMD |
| rs6442112   | RMVar_ID_87096   | m1A    | 3 | 48274544  | ZNF589      | DOWN   | m1A-quant-seq:(High) | Functional Loss | A | G | 0.2634 | -0.0140 | 0.0021 | 9.70E-09 | eBMD |
| rs9860285   | RMVar_ID_484907  | m6A    | 3 | 49317942  | USP4        | intron | MeRIP-seq:(Medium)   | Functional Loss | G | T | 0.2569 | -0.0148 | 0.0021 | 5.20E-10 | eBMD |
| rs11242     | RMVar_ID_487208  | m6A    | 3 | 53091908  | RFT1        | CDS    | miCLIP:(High)        | Functional Loss | T | C | 0.4412 | -0.0119 | 0.0019 | 2.70E-08 | eBMD |
| rs11242     | RMVar_ID_792758  | m6A    | 3 | 53091908  | RFT1        | CDS    | miCLIP:(High)        | Functional Loss | T | C | 0.4412 | -0.0119 | 0.0019 | 2.70E-08 | eBMD |
| rs73086405  | RMVar_ID_487628  | m6A    | 3 | 56272034  | ERC2        | intron | m6A-Label-seq:(High) | Functional Loss | T | A | 0.6119 | 0.0186  | 0.0019 | 9.90E-18 | eBMD |
| rs12629096  | RMVar_ID_487630  | m6A    | 3 | 56275606  | ERC2        | intron | m6A-Label-seq:(High) | Functional Loss | A | C | 0.6113 | 0.0187  | 0.0019 | 5.50E-18 | eBMD |
| rs7432266   | RMVar_ID_29890   | A-to-I | 3 | 57688184  | DENND6A     | intron | RNA-Seq:(High)       | Functional Loss | T | C | 0.1779 | -0.0178 | 0.0024 | 6.10E-10 | eBMD |
| rs7432266   | RMVar_ID_29889   | A-to-I | 3 | 57688184  | DENND6A     | intron | RNA-Seq:(High)       | Functional Loss | T | C | 0.1779 | -0.0178 | 0.0024 | 6.10E-10 | eBMD |
| rs513154    | RMVar_ID_685757  | m6A    | 3 | 101234368 | IMPG2       | intron | m6A-Label-seq:(High) | Functional Loss | T | G | 0.3428 | -0.0120 | 0.0019 | 1.70E-09 | eBMD |

|             |                  |        |   |           |             |        |                      |                 |   |   |        |         |        |           |          |
|-------------|------------------|--------|---|-----------|-------------|--------|----------------------|-----------------|---|---|--------|---------|--------|-----------|----------|
| rs513154    | RMVar_ID_685758  | m6A    | 3 | 101234368 | IMPG2       | intron | m6A-Label-seq:(High) | Functional Loss | T | G | 0.3428 | -0.0120 | 0.0019 | 1.70E-09  | eBMD     |
| rs513154    | RMVar_ID_685756  | m6A    | 3 | 101234368 | IMPG2       | intron | m6A-Label-seq:(High) | Functional Loss | T | G | 0.3428 | -0.0120 | 0.0019 | 1.70E-09  | eBMD     |
| rs4679245   | RMVar_ID_41376   | A-to-I | 3 | 126465607 | ZXDC        | intron | RNA-Seq:(High)       | Functional Loss | T | C | 0.3056 | -0.0113 | 0.0020 | 2.50E-09  | eBMD     |
| rs10935464  | RMVar_ID_695038  | m6A    | 3 | 142475914 | ATR         | intron | MeRIP-seq:(Medium)   | Functional Loss | G | C | 0.8403 | 0.0165  | 0.0025 | 2.40E-08  | eBMD     |
| rs10935464  | RMVar_ID_796033  | m6A    | 3 | 142475914 | ATR         | intron | MeRIP-seq:(Medium)   | Functional Loss | G | C | 0.8403 | 0.0165  | 0.0025 | 2.40E-08  | eBMD     |
| rs10935464  | RMVar_ID_695037  | m6A    | 3 | 142475914 | ATR         | intron | MeRIP-seq:(Medium)   | Functional Loss | G | C | 0.8403 | 0.0165  | 0.0025 | 2.40E-08  | eBMD     |
| rs75072999  | RMVar_ID_1309574 | m6A    | 4 | 850995    | GAK         | CDS    | Prediction:(Low)     | Functional Gain | G | A | 0.9049 | -0.0301 | 0.0032 | 1.80E-20  | eBMD     |
| rs6815946   | RMVar_ID_1309772 | m6A    | 4 | 1001501   | IDUA        | CDS    | Prediction:(Low)     | Functional Gain | T | C | 0.8485 | 0.0675  | 0.0026 | 2.50E-116 | eBMD     |
| rs6815946   | RMVar_ID_1309772 | m6A    | 4 | 1001501   | IDUA        | CDS    | Prediction:(Low)     | Functional Gain | T | C | 0.8485 | -0.0607 | 0.0091 | 3.80E-11  | Fracture |
| rs115790973 | RMVar_ID_1309776 | m6A    | 4 | 1002770   | IDUA        | CDS    | Prediction:(Low)     | Functional Gain | C | G | 0.8499 | 0.0684  | 0.0026 | 2.90E-119 | eBMD     |
| rs115790973 | RMVar_ID_1309777 | m6A    | 4 | 1002770   | IDUA        | CDS    | Prediction:(Low)     | Functional Gain | C | G | 0.8499 | 0.0684  | 0.0026 | 2.90E-119 | eBMD     |
| rs115790973 | RMVar_ID_1309775 | m6A    | 4 | 1002770   | IDUA        | CDS    | Prediction:(Low)     | Functional Gain | C | G | 0.8499 | 0.0684  | 0.0026 | 2.90E-119 | eBMD     |
| rs115790973 | RMVar_ID_1309777 | m6A    | 4 | 1002770   | IDUA        | CDS    | Prediction:(Low)     | Functional Gain | C | G | 0.8499 | -0.0626 | 0.0092 | 1.00E-11  | Fracture |
| rs115790973 | RMVar_ID_1309775 | m6A    | 4 | 1002770   | IDUA        | CDS    | Prediction:(Low)     | Functional Gain | C | G | 0.8499 | -0.0626 | 0.0092 | 1.00E-11  | Fracture |
| rs115790973 | RMVar_ID_1309776 | m6A    | 4 | 1002770   | IDUA        | CDS    | Prediction:(Low)     | Functional Gain | C | G | 0.8499 | -0.0626 | 0.0092 | 1.00E-11  | Fracture |
| rs3796619   | RMVar_ID_1309887 | m6A    | 4 | 1101518   | RNF212      | intron | Prediction:(Low)     | Functional Gain | A | G | 0.3173 | 0.0222  | 0.0020 | 9.80E-23  | eBMD     |
| rs11247975  | RMVar_ID_126236  | m5C    | 4 | 1171342   | SPON2       | CDS    | BS-Seq:(High)        | Functional Loss | G | T | 0.3195 | -0.0224 | 0.0020 | 1.60E-23  | eBMD     |
| rs11247975  | RMVar_ID_140483  | m5C    | 4 | 1171342   | SPON2       | CDS    | BS-Seq:(High)        | Functional Loss | G | T | 0.3195 | -0.0224 | 0.0020 | 1.60E-23  | eBMD     |
| rs11247975  | RMVar_ID_126237  | m5C    | 4 | 1171342   | SPON2       | CDS    | BS-Seq:(High)        | Functional Loss | G | T | 0.3195 | -0.0224 | 0.0020 | 1.60E-23  | eBMD     |
| rs11538062  | RMVar_ID_762837  | m6A    | 4 | 1171975   | SPON2       | CDS    | MeRIP-seq:(Medium)   | Functional Loss | C | T | 0.8608 | 0.0327  | 0.0027 | 1.60E-28  | eBMD     |
| rs11538062  | RMVar_ID_373288  | m6A    | 4 | 1171975   | SPON2       | CDS    | MeRIP-seq:(Medium)   | Functional Loss | C | T | 0.8608 | 0.0327  | 0.0027 | 1.60E-28  | eBMD     |
| rs6838561   | RMVar_ID_373641  | m6A    | 4 | 1386245   | UVSSA       | 3_UTR  | MeRIP-seq:(Medium)   | Functional Loss | A | G | 0.3182 | 0.0172  | 0.0020 | 1.80E-16  | eBMD     |
| rs901705    | RMVar_ID_1325029 | m6A    | 4 | 38366983  | LINC02513   | exon   | Prediction:(Low)     | Functional Gain | T | G | 0.3194 | 0.0146  | 0.0020 | 1.10E-10  | eBMD     |
| rs901705    | RMVar_ID_1325028 | m6A    | 4 | 38366983  | LINC02513   | exon   | Prediction:(Low)     | Functional Gain | T | G | 0.3194 | 0.0146  | 0.0020 | 1.10E-10  | eBMD     |
| rs17500058  | RMVar_ID_153736  | m6A    | 4 | 38512672  | LINC01259   | exon   | m6A-Label-seq:(High) | Functional Loss | A | G | 0.7527 | -0.0179 | 0.0022 | 7.20E-15  | eBMD     |
| rs112068329 | RMVar_ID_1314207 | m6A    | 4 | 105369330 | PPA2        | 3_UTR  | Prediction:(Low)     | Functional Loss | T | G | 0.8683 | 0.0172  | 0.0027 | 1.20E-08  | eBMD     |
| rs8733      | RMVar_ID_58373   | m1A    | 4 | 165342967 | MSMO1       | 3_UTR  | m1A-quant-seq:(High) | Functional Loss | A | G | 0.7626 | -0.0157 | 0.0022 | 2.40E-11  | eBMD     |
| rs8733      | RMVar_ID_111207  | m1A    | 4 | 165342967 | MSMO1       | 3_UTR  | m1A-quant-seq:(High) | Functional Loss | A | G | 0.7626 | -0.0157 | 0.0022 | 2.40E-11  | eBMD     |
| rs8733      | RMVar_ID_58374   | m1A    | 4 | 165342967 | MSMO1       | 3_UTR  | m1A-quant-seq:(High) | Functional Loss | A | G | 0.7626 | -0.0157 | 0.0022 | 2.40E-11  | eBMD     |
| rs676067    | RMVar_ID_1354392 | m6A    | 5 | 41951507  | FBXO4       | intron | Prediction:(Low)     | Functional Loss | G | A | 0.7561 | -0.0154 | 0.0022 | 6.30E-11  | eBMD     |
| rs6875903   | RMVar_ID_440797  | m6A    | 5 | 55476166  | PPAP2A      | intron | m6A-Label-seq:(High) | Functional Loss | T | G | 0.8310 | -0.0182 | 0.0025 | 4.70E-11  | eBMD     |
| rs6875903   | RMVar_ID_820629  | m6A    | 5 | 55476166  | PPAP2A      | intron | m6A-Label-seq:(High) | Functional Loss | T | G | 0.8310 | -0.0182 | 0.0025 | 4.70E-11  | eBMD     |
| rs6556919   | RMVar_ID_254016  | m6A    | 5 | 96364161  | LOC10192971 | exon   | m6A-Label-seq:(High) | Functional Loss | A | C | 0.3311 | -0.0148 | 0.0020 | 7.90E-14  | eBMD     |
| rs1045706   | RMVar_ID_824484  | m6A    | 5 | 109378599 | PJA2        | CDS    | MeRIP-seq:(Medium)   | Functional Loss | T | C | 0.4062 | -0.0145 | 0.0019 | 4.80E-11  | eBMD     |
| rs1045706   | RMVar_ID_391374  | m6A    | 5 | 109378599 | PJA2        | CDS    | MeRIP-seq:(Medium)   | Functional Loss | T | C | 0.4062 | -0.0145 | 0.0019 | 4.80E-11  | eBMD     |

|             |                  |     |   |           |            |        |                        |                 |   |   |        |         |        |          |      |
|-------------|------------------|-----|---|-----------|------------|--------|------------------------|-----------------|---|---|--------|---------|--------|----------|------|
| rs11241184  | RMVar_ID_391646  | m6A | 5 | 112762060 | APC        | intron | m6A-Label-seq:(High)   | Functional Loss | A | G | 0.4882 | 0.0137  | 0.0018 | 2.10E-12 | eBMD |
| rs390092    | RMVar_ID_391651  | m6A | 5 | 112810500 | APC        | intron | m6A-Label-seq:(High)   | Functional Loss | T | G | 0.5058 | 0.0142  | 0.0018 | 5.10E-13 | eBMD |
| rs6595440   | RMVar_ID_1337638 | m6A | 5 | 123383045 | CEP120     | CDS    | Prediction:(Low)       | Functional Gain | G | C | 0.5645 | -0.0113 | 0.0019 | 8.20E-11 | eBMD |
| rs11958836  | RMVar_ID_686549  | m6A | 5 | 123402629 | CEP120     | intron | MeRIP-seq:(Medium)     | Functional Loss | G | A | 0.5662 | -0.0113 | 0.0019 | 9.80E-11 | eBMD |
| rs11958836  | RMVar_ID_686550  | m6A | 5 | 123402629 | CEP120     | intron | MeRIP-seq:(Medium)     | Functional Loss | G | A | 0.5662 | -0.0113 | 0.0019 | 9.80E-11 | eBMD |
| rs7732639   | RMVar_ID_114877  | m1A | 5 | 128537912 | FBN2       | 5_UTR  | m1A-quant-seq:(High)   | Functional Loss | T | C | 0.6840 | 0.0146  | 0.0020 | 1.70E-10 | eBMD |
| rs7732639   | RMVar_ID_105215  | m1A | 5 | 128537912 | FBN2       | 5_UTR  | m1A-quant-seq:(High)   | Functional Loss | T | C | 0.6840 | 0.0146  | 0.0020 | 1.70E-10 | eBMD |
| rs7732639   | RMVar_ID_105214  | m1A | 5 | 128537912 | FBN2       | 5_UTR  | m1A-quant-seq:(High)   | Functional Loss | T | C | 0.6840 | 0.0146  | 0.0020 | 1.70E-10 | eBMD |
| rs30177     | RMVar_ID_820778  | m6A | 5 | 132866717 | UQCRQ      | intron | MeRIP-seq:(Medium)     | Functional Loss | C | G | 0.2551 | 0.0148  | 0.0021 | 8.10E-09 | eBMD |
| rs30177     | RMVar_ID_687786  | m6A | 5 | 132866717 | UQCRQ      | intron | MeRIP-seq:(Medium)     | Functional Loss | C | G | 0.2551 | 0.0148  | 0.0021 | 8.10E-09 | eBMD |
| rs6906505   | RMVar_ID_1362266 | m6A | 6 | 7213016   | RREB1      | intron | Prediction:(Low)       | Functional Loss | C | T | 0.5214 | -0.0136 | 0.0018 | 5.70E-10 | eBMD |
| rs2073531   | RMVar_ID_1373098 | m6A | 6 | 26375032  | BTN3A2     | intron | Prediction:(Low)       | Functional Loss | A | G | 0.8676 | -0.0171 | 0.0027 | 1.10E-10 | eBMD |
| rs3757138   | RMVar_ID_285949  | m6A | 6 | 26375875  | BTN3A2     | 3_UTR  | miCLIP:(High)          | Functional Loss | A | G | 0.8673 | -0.0170 | 0.0027 | 1.30E-10 | eBMD |
| rs3757138   | RMVar_ID_809012  | m6A | 6 | 26375875  | BTN3A2     | 3_UTR  | miCLIP:(High)          | Functional Loss | A | G | 0.8673 | -0.0170 | 0.0027 | 1.30E-10 | eBMD |
| rs56405707  | RMVar_ID_144848  | m5U | 6 | 27672469  | TRS-CGA3-1 | exon   | FICC-Seq&miCLIP:(High) | Functional Loss | G | A | 0.8820 | -0.0194 | 0.0028 | 1.80E-11 | eBMD |
| rs9986596   | RMVar_ID_123397  | m5C | 6 | 28251883  | ZKSCAN4    | CDS    | BS-Seq:(High)          | Functional Loss | G | A | 0.8375 | -0.0145 | 0.0025 | 9.60E-09 | eBMD |
| rs9986596   | RMVar_ID_142232  | m5C | 6 | 28251883  | ZKSCAN4    | CDS    | BS-Seq:(High)          | Functional Loss | G | A | 0.8375 | -0.0145 | 0.0025 | 9.60E-09 | eBMD |
| rs9986596   | RMVar_ID_123398  | m5C | 6 | 28251883  | ZKSCAN4    | CDS    | BS-Seq:(High)          | Functional Loss | G | A | 0.8375 | -0.0145 | 0.0025 | 9.60E-09 | eBMD |
| rs853678    | RMVar_ID_287202  | m6A | 6 | 28329536  | ZSCAN31    | CDS    | MeRIP-seq:(Medium)     | Functional Loss | T | A | 0.8355 | -0.0142 | 0.0025 | 3.70E-09 | eBMD |
| rs853678    | RMVar_ID_806285  | m6A | 6 | 28329536  | ZSCAN31    | CDS    | MeRIP-seq:(Medium)     | Functional Loss | T | A | 0.8355 | -0.0142 | 0.0025 | 3.70E-09 | eBMD |
| rs853678    | RMVar_ID_287201  | m6A | 6 | 28329536  | ZSCAN31    | CDS    | MeRIP-seq:(Medium)     | Functional Loss | T | A | 0.8355 | -0.0142 | 0.0025 | 3.70E-09 | eBMD |
| rs9260119   | RMVar_ID_1374301 | m6A | 6 | 29942440  | HLA-A      | UP     | Prediction:(Low)       | Functional Gain | A | T | 0.4234 | 0.0195  | 0.0019 | 1.60E-22 | eBMD |
| rs9260119   | RMVar_ID_1374302 | m6A | 6 | 29942440  | HLA-A      | UP     | Prediction:(Low)       | Functional Gain | A | T | 0.4234 | 0.0195  | 0.0019 | 1.60E-22 | eBMD |
| rs9260146   | RMVar_ID_1374312 | m6A | 6 | 29943131  | HLA-A      | intron | Prediction:(Low)       | Functional Gain | C | T | 0.8043 | -0.0221 | 0.0023 | 1.80E-19 | eBMD |
| rs1061815   | RMVar_ID_287800  | m6A | 6 | 29945596  | HLA-A      | 3_UTR  | MeRIP-seq:(Medium)     | Functional Loss | C | G | 0.8044 | -0.0221 | 0.0023 | 2.10E-19 | eBMD |
| rs1061815   | RMVar_ID_287799  | m6A | 6 | 29945596  | HLA-A      | 3_UTR  | MeRIP-seq:(Medium)     | Functional Loss | C | G | 0.8044 | -0.0221 | 0.0023 | 2.10E-19 | eBMD |
| rs35835721  | RMVar_ID_287831  | m6A | 6 | 29974607  | MICD       | exon   | m6A-Label-seq:(High)   | Functional Loss | T | G | 0.7139 | 0.0125  | 0.0020 | 4.20E-09 | eBMD |
| rs35835721  | RMVar_ID_809663  | m6A | 6 | 29974607  | MICD       | exon   | m6A-Label-seq:(High)   | Functional Loss | T | G | 0.7139 | 0.0125  | 0.0020 | 4.20E-09 | eBMD |
| rs36019691  | RMVar_ID_805118  | m6A | 6 | 29974607  | MICD       | exon   | m6A-Label-seq:(High)   | Functional Loss | T | C | 0.7139 | 0.0125  | 0.0020 | 4.20E-09 | eBMD |
| rs36019691  | RMVar_ID_287829  | m6A | 6 | 29974607  | MICD       | exon   | m6A-Label-seq:(High)   | Functional Loss | T | C | 0.7139 | 0.0125  | 0.0020 | 4.20E-09 | eBMD |
| rs2285800   | RMVar_ID_361152  | m6A | 6 | 30289719  | HCG18      | 3_UTR  | MeRIP-seq:(Medium)     | Functional Loss | C | G | 0.7353 | 0.0127  | 0.0021 | 6.70E-09 | eBMD |
| rs2285800   | RMVar_ID_806384  | m6A | 6 | 30289719  | HCG18      | 3_UTR  | MeRIP-seq:(Medium)     | Functional Loss | C | G | 0.7353 | 0.0127  | 0.0021 | 6.70E-09 | eBMD |
| rs186215159 | RMVar_ID_1380053 | m6A | 6 | 35090322  | ANKS1A     | 3_UTR  | Prediction:(Low)       | Functional Loss | G | A | 0.9811 | 0.0410  | 0.0067 | 2.80E-10 | eBMD |
| rs12206659  | RMVar_ID_541055  | m6A | 6 | 54004423  | MLIP-IT1   | intron | m6A-Label-seq:(High)   | Functional Loss | T | C | 0.5725 | 0.0122  | 0.0018 | 8.00E-10 | eBMD |
| rs4715631   | RMVar_ID_804448  | m6A | 6 | 56552747  | DST        | CDS    | MeRIP-seq:(Medium)     | Functional Loss | T | C | 0.2884 | -0.0118 | 0.0020 | 1.10E-08 | eBMD |

|             |                  |     |   |           |             |        |                      |                 |   |   |        |         |        |          |      |
|-------------|------------------|-----|---|-----------|-------------|--------|----------------------|-----------------|---|---|--------|---------|--------|----------|------|
| rs4715631   | RMVar_ID_541276  | m6A | 6 | 56552747  | DST         | CDS    | MeRIP-seq:(Medium)   | Functional Loss | T | C | 0.2884 | -0.0118 | 0.0020 | 1.10E-08 | eBMD |
| rs45477497  | RMVar_ID_541751  | m6A | 6 | 57103511  | ZNF451      | intron | MeRIP-seq:(Medium)   | Functional Loss | G | T | 0.9452 | 0.0257  | 0.0040 | 1.40E-08 | eBMD |
| rs12660627  | RMVar_ID_507256  | m6A | 6 | 73794501  | CD109       | intron | m6A-Label-seq:(High) | Functional Loss | A | G | 0.4848 | 0.0233  | 0.0018 | 5.30E-31 | eBMD |
| rs293526    | RMVar_ID_1387238 | m6A | 6 | 82938365  | UBE3D       | intron | Prediction:(Low)     | Functional Loss | C | T | 0.2926 | 0.0216  | 0.0020 | 3.00E-19 | eBMD |
| rs12209871  | RMVar_ID_1387246 | m6A | 6 | 83036347  | UBE3D       | intron | Prediction:(Low)     | Functional Gain | A | G | 0.8546 | -0.0194 | 0.0026 | 3.00E-10 | eBMD |
| rs6902288   | RMVar_ID_327995  | m6A | 6 | 127447618 | KIAA0408    | CDS    | MeRIP-seq:(Medium)   | Functional Loss | G | A | 0.3963 | -0.0157 | 0.0019 | 1.00E-12 | eBMD |
| rs6902288   | RMVar_ID_327994  | m6A | 6 | 127447618 | KIAA0408    | CDS    | MeRIP-seq:(Medium)   | Functional Loss | G | A | 0.3963 | -0.0157 | 0.0019 | 1.00E-12 | eBMD |
| rs6902288   | RMVar_ID_804754  | m6A | 6 | 127447618 | KIAA0408    | CDS    | MeRIP-seq:(Medium)   | Functional Loss | G | A | 0.3963 | -0.0157 | 0.0019 | 1.00E-12 | eBMD |
| rs6975      | RMVar_ID_1366544 | m6A | 6 | 130834964 | SMLR1       | 3_UTR  | Prediction:(Low)     | Functional Loss | G | T | 0.7379 | -0.0188 | 0.0021 | 5.70E-13 | eBMD |
| rs6975      | RMVar_ID_1366543 | m6A | 6 | 130834964 | SMLR1       | 3_UTR  | Prediction:(Low)     | Functional Loss | G | T | 0.7379 | -0.0188 | 0.0021 | 5.70E-13 | eBMD |
| rs3823310   | RMVar_ID_809307  | m6A | 6 | 151353191 | AKAP12      | CDS    | MeRIP-seq:(Medium)   | Functional Loss | A | C | 0.3268 | -0.0166 | 0.0020 | 8.20E-15 | eBMD |
| rs3823310   | RMVar_ID_663132  | m6A | 6 | 151353191 | AKAP12      | CDS    | MeRIP-seq:(Medium)   | Functional Loss | A | C | 0.3268 | -0.0166 | 0.0020 | 8.20E-15 | eBMD |
| rs9397054   | RMVar_ID_1369505 | m6A | 6 | 151468793 | ARMT1       | CDS    | Prediction:(Low)     | Functional Loss | C | T | 0.8973 | 0.0474  | 0.0030 | 2.80E-44 | eBMD |
| rs9383935   | RMVar_ID_1369539 | m6A | 6 | 151618697 | CCDC170     | 3_UTR  | Prediction:(Low)     | Functional Loss | C | T | 0.9220 | 0.0427  | 0.0034 | 1.30E-27 | eBMD |
| rs7740449   | RMVar_ID_663340  | m6A | 6 | 152253365 | SYNE1       | intron | m6A-Label-seq:(High) | Functional Loss | T | C | 0.3837 | 0.0167  | 0.0019 | 1.20E-15 | eBMD |
| rs668261    | RMVar_ID_664158  | m6A | 6 | 158463191 | TULP4       | intron | m6A-Label-seq:(High) | Functional Loss | T | A | 0.6655 | -0.0128 | 0.0019 | 4.60E-11 | eBMD |
| rs668261    | RMVar_ID_806491  | m6A | 6 | 158463191 | TULP4       | intron | m6A-Label-seq:(High) | Functional Loss | T | A | 0.6655 | -0.0128 | 0.0019 | 4.60E-11 | eBMD |
| rs11975534  | RMVar_ID_510509  | m6A | 7 | 15686504  | MEOX2       | 5_UTR  | MeRIP-seq:(Medium)   | Functional Loss | A | C | 0.3676 | -0.0290 | 0.0019 | 2.60E-46 | eBMD |
| rs11975534  | RMVar_ID_510510  | m6A | 7 | 15686504  | MEOX2       | 5_UTR  | MeRIP-seq:(Medium)   | Functional Loss | A | C | 0.3676 | -0.0290 | 0.0019 | 2.60E-46 | eBMD |
| rs11975534  | RMVar_ID_828358  | m6A | 7 | 15686504  | MEOX2       | 5_UTR  | MeRIP-seq:(Medium)   | Functional Loss | A | C | 0.3676 | -0.0290 | 0.0019 | 2.60E-46 | eBMD |
| rs1121731   | RMVar_ID_510808  | m6A | 7 | 19582372  | LOC10537518 | exon   | m6A-Label-seq:(High) | Functional Loss | A | C | 0.6268 | -0.0128 | 0.0019 | 1.30E-10 | eBMD |
| rs6461998   | RMVar_ID_512406  | m6A | 7 | 27241538  | EVX1-AS     | intron | m6A-Label-seq:(High) | Functional Loss | T | C | 0.0559 | 0.0375  | 0.0040 | 6.50E-18 | eBMD |
| rs7795470   | RMVar_ID_512411  | m6A | 7 | 27246764  | EVX1        | 3_UTR  | MeRIP-seq:(Medium)   | Functional Loss | T | C | 0.0202 | 0.0387  | 0.0065 | 7.70E-09 | eBMD |
| rs7795470   | RMVar_ID_512412  | m6A | 7 | 27246764  | EVX1        | 3_UTR  | MeRIP-seq:(Medium)   | Functional Loss | T | C | 0.0202 | 0.0387  | 0.0065 | 7.70E-09 | eBMD |
| rs7795470   | RMVar_ID_828393  | m6A | 7 | 27246764  | EVX1        | 3_UTR  | MeRIP-seq:(Medium)   | Functional Loss | T | C | 0.0202 | 0.0387  | 0.0065 | 7.70E-09 | eBMD |
| rs7795470   | RMVar_ID_512410  | m6A | 7 | 27246764  | EVX1        | 3_UTR  | MeRIP-seq:(Medium)   | Functional Loss | T | C | 0.0202 | 0.0387  | 0.0065 | 7.70E-09 | eBMD |
| rs2722276   | RMVar_ID_580807  | m6A | 7 | 37949577  | EPDR1       | intron | MeRIP-seq:(Medium)   | Functional Loss | G | A | 0.4731 | 0.0164  | 0.0018 | 1.30E-18 | eBMD |
| rs117893851 | RMVar_ID_1415575 | m6A | 7 | 92471521  | ERVW-1      | intron | Prediction:(Low)     | Functional Loss | G | A | 0.9212 | 0.0205  | 0.0034 | 2.10E-08 | eBMD |
| rs62470375  | RMVar_ID_349640  | m6A | 7 | 96664376  | SEM1        | intron | MeRIP-seq:(Medium)   | Functional Loss | A | G | 0.8929 | -0.0203 | 0.0029 | 8.80E-10 | eBMD |
| rs7787376   | RMVar_ID_831199  | m6A | 7 | 97116762  | ACN9        | 5_UTR  | m6A-Label-seq:(High) | Functional Loss | A | G | 0.6575 | 0.0176  | 0.0019 | 1.20E-15 | eBMD |
| rs7787376   | RMVar_ID_349707  | m6A | 7 | 97116762  | ACN9        | 5_UTR  | m6A-Label-seq:(High) | Functional Loss | A | G | 0.6575 | 0.0176  | 0.0019 | 1.20E-15 | eBMD |
| rs28680963  | RMVar_ID_1417519 | m6A | 7 | 100307836 | SPDYE3      | 5_UTR  | Prediction:(Low)     | Functional Loss | C | G | 0.8109 | 0.0147  | 0.0023 | 5.20E-10 | eBMD |
| rs7792525   | RMVar_ID_351718  | m6A | 7 | 100374497 | PILRA       | intron | MeRIP-seq:(Medium)   | Functional Loss | A | G | 0.8112 | 0.0146  | 0.0023 | 8.30E-10 | eBMD |
| rs7792525   | RMVar_ID_829541  | m6A | 7 | 100374497 | PILRA       | intron | MeRIP-seq:(Medium)   | Functional Loss | A | G | 0.8112 | 0.0146  | 0.0023 | 8.30E-10 | eBMD |
| rs6962151   | RMVar_ID_115132  | m1A | 7 | 100430861 | MEPCE       | CDS    | MeRIP-seq:(Medium)   | Functional Loss | T | C | 0.8041 | 0.0147  | 0.0023 | 2.70E-10 | eBMD |



|             |                  |     |   |           |              |        |                      |                 |   |   |        |         |        |          |      |
|-------------|------------------|-----|---|-----------|--------------|--------|----------------------|-----------------|---|---|--------|---------|--------|----------|------|
| rs6962151   | RMVar_ID_74483   | m1A | 7 | 100430861 | MEPCE        | CDS    | MeRIP-seq:(Medium)   | Functional Loss | T | C | 0.8041 | 0.0147  | 0.0023 | 2.70E-10 | eBMD |
| rs6962151   | RMVar_ID_351769  | m6A | 7 | 100430861 | MEPCE        | CDS    | MeRIP-seq:(Medium)   | Functional Loss | T | C | 0.8041 | 0.0147  | 0.0023 | 2.70E-10 | eBMD |
| rs6962151   | RMVar_ID_829742  | m6A | 7 | 100430861 | MEPCE        | CDS    | MeRIP-seq:(Medium)   | Functional Loss | T | C | 0.8041 | 0.0147  | 0.0023 | 2.70E-10 | eBMD |
| rs11559028  | RMVar_ID_352025  | m6A | 7 | 100707240 | POP7         | CDS    | MeRIP-seq:(Medium)   | Functional Loss | C | A | 0.9605 | -0.0291 | 0.0047 | 3.00E-09 | eBMD |
| rs11559028  | RMVar_ID_352026  | m6A | 7 | 100707240 | POP7         | CDS    | MeRIP-seq:(Medium)   | Functional Loss | C | A | 0.9605 | -0.0291 | 0.0047 | 3.00E-09 | eBMD |
| rs79163323  | RMVar_ID_1418011 | m6A | 7 | 100748415 | ZAN          | CDS    | Prediction:(Low)     | Functional Loss | C | T | 0.9656 | -0.0325 | 0.0050 | 5.90E-09 | eBMD |
| rs61729506  | RMVar_ID_322948  | m6A | 7 | 149266560 | ZNF783       | CDS    | MeRIP-seq:(Medium)   | Functional Loss | C | T | 0.9320 | 0.0222  | 0.0036 | 1.60E-09 | eBMD |
| rs112796174 | RMVar_ID_1562955 | m7G | 7 | 149289177 | LOC155060    | exon   | MeRIP-seq:(Medium)   | Functional Loss | G | T | 0.9319 | 0.0223  | 0.0036 | 1.80E-09 | eBMD |
| rs112796174 | RMVar_ID_1562954 | m7G | 7 | 149289177 | LOC155060    | exon   | MeRIP-seq:(Medium)   | Functional Loss | G | T | 0.9319 | 0.0223  | 0.0036 | 1.80E-09 | eBMD |
| rs1050734   | RMVar_ID_434132  | m6A | 7 | 151076478 | SLC4A2       | 3_UTR  | MeRIP-seq:(Medium)   | Functional Loss | C | A | 0.7518 | 0.0176  | 0.0021 | 1.40E-13 | eBMD |
| rs897917    | RMVar_ID_1401422 | m6A | 7 | 151212533 | ABCF2        | 3_UTR  | Prediction:(Low)     | Functional Gain | G | C | 0.5882 | 0.0098  | 0.0019 | 8.60E-09 | eBMD |
| rs2608288   | RMVar_ID_434227  | m6A | 7 | 151213367 | ABCF2        | 3_UTR  | MeRIP-seq:(Medium)   | Functional Loss | C | G | 0.4115 | -0.0105 | 0.0019 | 8.40E-10 | eBMD |
| rs2945254   | RMVar_ID_654379  | m6A | 8 | 8235719   | FAM86B3P     | intron | MeRIP-seq:(Medium)   | Functional Loss | G | T | 0.8663 | -0.0312 | 0.0028 | 1.60E-22 | eBMD |
| rs13256369  | RMVar_ID_654649  | m6A | 8 | 8719869   | RF00017-4499 | intron | m6A-Label-seq:(High) | Functional Loss | T | C | 0.7450 | -0.0256 | 0.0021 | 1.00E-25 | eBMD |
| rs13256369  | RMVar_ID_845065  | m6A | 8 | 8719869   | RF00017-4499 | intron | m6A-Label-seq:(High) | Functional Loss | T | C | 0.7450 | -0.0256 | 0.0021 | 1.00E-25 | eBMD |
| rs2979247   | RMVar_ID_1421525 | m6A | 8 | 9031438   | ERI1         | 3_UTR  | Prediction:(Low)     | Functional Loss | A | G | 0.5810 | -0.0313 | 0.0019 | 3.40E-42 | eBMD |
| rs11780338  | RMVar_ID_102469  | m1A | 8 | 9032336   | ERI1         | 3_UTR  | m1A-quant-seq:(High) | Functional Loss | A | G | 0.6788 | 0.0245  | 0.0020 | 3.20E-22 | eBMD |
| rs11780338  | RMVar_ID_102470  | m1A | 8 | 9032336   | ERI1         | 3_UTR  | m1A-quant-seq:(High) | Functional Loss | A | G | 0.6788 | 0.0245  | 0.0020 | 3.20E-22 | eBMD |
| rs330917    | RMVar_ID_654871  | m6A | 8 | 9139685   | PPP1R3B      | 3_UTR  | MeRIP-seq:(Medium)   | Functional Loss | G | T | 0.7103 | -0.0280 | 0.0020 | 2.30E-31 | eBMD |
| rs330917    | RMVar_ID_845792  | m6A | 8 | 9139685   | PPP1R3B      | 3_UTR  | MeRIP-seq:(Medium)   | Functional Loss | G | T | 0.7103 | -0.0280 | 0.0020 | 2.30E-31 | eBMD |
| rs592420    | RMVar_ID_1421706 | m6A | 8 | 9902922   | LINC00599    | exon   | Prediction:(Low)     | Functional Gain | A | G | 0.7522 | -0.0215 | 0.0022 | 4.90E-16 | eBMD |
| rs71516561  | RMVar_ID_655017  | m6A | 8 | 10219867  | MSRA         | intron | m6A-Label-seq:(High) | Functional Loss | T | G | 0.7485 | -0.0182 | 0.0021 | 5.80E-16 | eBMD |
| rs2952194   | RMVar_ID_655022  | m6A | 8 | 10260492  | MSRA         | intron | MeRIP-seq:(Medium)   | Functional Loss | A | G | 0.8088 | -0.0145 | 0.0024 | 1.40E-08 | eBMD |
| rs2975648   | RMVar_ID_655023  | m6A | 8 | 10278466  | MSRA         | intron | m6A-Label-seq:(High) | Functional Loss | T | C | 0.5666 | -0.0338 | 0.0019 | 9.50E-51 | eBMD |
| rs6601438   | RMVar_ID_655025  | m6A | 8 | 10322157  | MSRA         | intron | m6A-Label-seq:(High) | Functional Loss | A | C | 0.2732 | -0.0290 | 0.0021 | 7.50E-34 | eBMD |
| rs55642448  | RMVar_ID_1421883 | m6A | 8 | 10607241  | RP1L1        | CDS    | Prediction:(Low)     | Functional Gain | C | T | 0.6134 | -0.0169 | 0.0019 | 9.80E-13 | eBMD |
| rs4841497   | RMVar_ID_655209  | m6A | 8 | 11127630  | XKR6         | intron | m6A-Label-seq:(High) | Functional Loss | A | G | 0.6152 | 0.0286  | 0.0019 | 2.30E-35 | eBMD |
| rs4841497   | RMVar_ID_843249  | m6A | 8 | 11127630  | XKR6         | intron | m6A-Label-seq:(High) | Functional Loss | A | G | 0.6152 | 0.0286  | 0.0019 | 2.30E-35 | eBMD |
| rs2293856   | RMVar_ID_1422257 | m6A | 8 | 11319964  | MTMR9        | intron | Prediction:(Low)     | Functional Loss | C | T | 0.5977 | -0.0323 | 0.0019 | 3.90E-46 | eBMD |
| rs899368    | RMVar_ID_655306  | m6A | 8 | 11643283  | LOC10537924  | intron | m6A-Label-seq:(High) | Functional Loss | T | A | 0.1170 | 0.0256  | 0.0029 | 2.70E-12 | eBMD |
| rs904018    | RMVar_ID_1422499 | m6A | 8 | 11759015  | GATA4        | 3_UTR  | Prediction:(Low)     | Functional Gain | T | C | 0.3570 | 0.0190  | 0.0019 | 1.10E-22 | eBMD |
| rs2645429   | RMVar_ID_1422578 | m6A | 8 | 11802558  | FDFT1        | intron | Prediction:(Low)     | Functional Gain | A | G | 0.2435 | -0.0246 | 0.0022 | 3.70E-22 | eBMD |
| rs2645429   | RMVar_ID_1422577 | m6A | 8 | 11802558  | FDFT1        | intron | Prediction:(Low)     | Functional Gain | A | G | 0.2435 | -0.0246 | 0.0022 | 3.70E-22 | eBMD |
| rs1047643   | RMVar_ID_115736  | m1A | 8 | 11802853  | FDFT1        | CDS    | MeRIP-seq:(Medium)   | Functional Loss | T | C | 0.8293 | 0.0164  | 0.0025 | 5.90E-09 | eBMD |
| rs1047643   | RMVar_ID_102493  | m1A | 8 | 11802853  | FDFT1        | CDS    | MeRIP-seq:(Medium)   | Functional Loss | T | C | 0.8293 | 0.0164  | 0.0025 | 5.90E-09 | eBMD |

|            |                  |     |    |           |             |        |                      |                 |   |   |        |         |        |          |      |
|------------|------------------|-----|----|-----------|-------------|--------|----------------------|-----------------|---|---|--------|---------|--------|----------|------|
| rs8898     | RMVar_ID_655550  | m6A | 8  | 11845033  | CTSB        | 3_UTR  | miCLIP:(High)        | Functional Loss | T | C | 0.6533 | -0.0177 | 0.0019 | 6.50E-13 | eBMD |
| rs8898     | RMVar_ID_845032  | m6A | 8  | 11845033  | CTSB        | 3_UTR  | miCLIP:(High)        | Functional Loss | T | C | 0.6533 | -0.0177 | 0.0019 | 6.50E-13 | eBMD |
| rs7464553  | RMVar_ID_655566  | m6A | 8  | 11920392  | OR7E158P    | exon   | m6A-Label-seq:(High) | Functional Loss | T | C | 0.4472 | -0.0317 | 0.0019 | 7.70E-47 | eBMD |
| rs2709618  | RMVar_ID_115733  | m1A | 8  | 25410106  | DOCK5       | CDS    | MeRIP-seq:(Medium)   | Functional Loss | A | G | 0.3691 | 0.0140  | 0.0019 | 3.50E-15 | eBMD |
| rs2709618  | RMVar_ID_99375   | m1A | 8  | 25410106  | DOCK5       | CDS    | MeRIP-seq:(Medium)   | Functional Loss | A | G | 0.3691 | 0.0140  | 0.0019 | 3.50E-15 | eBMD |
| rs6468694  | RMVar_ID_1442370 | m6A | 8  | 99853637  | VPS13B      | CDS    | Prediction:(Low)     | Functional Loss | G | A | 0.8744 | -0.0207 | 0.0028 | 3.70E-12 | eBMD |
| rs631775   | RMVar_ID_741965  | m6A | 8  | 108240517 | EIF3E       | intron | m6A-Label-seq:(High) | Functional Loss | T | C | 0.4257 | 0.0134  | 0.0019 | 2.00E-09 | eBMD |
| rs631775   | RMVar_ID_846871  | m6A | 8  | 108240517 | EIF3E       | intron | m6A-Label-seq:(High) | Functional Loss | T | C | 0.4257 | 0.0134  | 0.0019 | 2.00E-09 | eBMD |
| rs2005617  | RMVar_ID_865560  | m6A | 9  | 33791166  | PRSS3       | intron | m6A-Label-seq:(High) | Functional Loss | T | C | 0.3755 | -0.0128 | 0.0019 | 1.10E-10 | eBMD |
| rs2005617  | RMVar_ID_238503  | m6A | 9  | 33791166  | PRSS3       | intron | m6A-Label-seq:(High) | Functional Loss | T | C | 0.3755 | -0.0128 | 0.0019 | 1.10E-10 | eBMD |
| rs2005617  | RMVar_ID_238504  | m6A | 9  | 33791166  | PRSS3       | intron | m6A-Label-seq:(High) | Functional Loss | T | C | 0.3755 | -0.0128 | 0.0019 | 1.10E-10 | eBMD |
| rs307658   | RMVar_ID_116986  | m1A | 9  | 33941761  | UBAP2       | CDS    | m1A-quant-seq:(High) | Functional Loss | T | C | 0.6223 | 0.0127  | 0.0019 | 2.20E-10 | eBMD |
| rs307658   | RMVar_ID_64186   | m1A | 9  | 33941761  | UBAP2       | CDS    | m1A-quant-seq:(High) | Functional Loss | T | C | 0.6223 | 0.0127  | 0.0019 | 2.20E-10 | eBMD |
| rs11141677 | RMVar_ID_1465006 | m6A | 9  | 87084277  | NFYCP2      | exon   | Prediction:(Low)     | Functional Loss | C | G | 0.7508 | -0.0155 | 0.0021 | 2.60E-08 | eBMD |
| rs10821035 | RMVar_ID_689272  | m6A | 9  | 92873793  | ZNF484      | intron | m6A-Label-seq:(High) | Functional Loss | T | C | 0.6359 | 0.0181  | 0.0019 | 5.50E-15 | eBMD |
| rs10821035 | RMVar_ID_867084  | m6A | 9  | 92873793  | ZNF484      | intron | m6A-Label-seq:(High) | Functional Loss | T | C | 0.6359 | 0.0181  | 0.0019 | 5.50E-15 | eBMD |
| rs11793637 | RMVar_ID_689507  | m6A | 9  | 93653617  | PHF2        | intron | m6A-Label-seq:(High) | Functional Loss | A | G | 0.4973 | 0.0162  | 0.0019 | 1.90E-15 | eBMD |
| rs11793637 | RMVar_ID_689508  | m6A | 9  | 93653617  | PHF2        | intron | m6A-Label-seq:(High) | Functional Loss | A | G | 0.4973 | 0.0162  | 0.0019 | 1.90E-15 | eBMD |
| rs3217751  | RMVar_ID_865223  | m6A | 9  | 127790634 | CDK9        | 3_UTR  | miCLIP:(High)        | Functional Loss | A | G | 0.5876 | -0.0135 | 0.0019 | 2.20E-10 | eBMD |
| rs3217751  | RMVar_ID_712249  | m6A | 9  | 127790634 | CDK9        | 3_UTR  | miCLIP:(High)        | Functional Loss | A | G | 0.5876 | -0.0135 | 0.0019 | 2.20E-10 | eBMD |
| rs10901225 | RMVar_ID_714204  | m6A | 9  | 130605964 | FUBP3       | intron | m6A-Label-seq:(High) | Functional Loss | A | C | 0.7494 | 0.0241  | 0.0022 | 2.20E-24 | eBMD |
| rs10901225 | RMVar_ID_714203  | m6A | 9  | 130605964 | FUBP3       | intron | m6A-Label-seq:(High) | Functional Loss | A | C | 0.7494 | 0.0241  | 0.0022 | 2.20E-24 | eBMD |
| rs41302673 | RMVar_ID_1452935 | m6A | 9  | 133405412 | STKLD1      | CDS    | Prediction:(Low)     | Functional Loss | T | G | 0.9096 | 0.0264  | 0.0032 | 5.00E-12 | eBMD |
| rs739468   | RMVar_ID_715939  | m6A | 9  | 133461126 | CACFD1      | intron | m6A-Label-seq:(High) | Functional Loss | T | G | 0.1353 | -0.0241 | 0.0027 | 7.30E-14 | eBMD |
| rs739468   | RMVar_ID_715938  | m6A | 9  | 133461126 | CACFD1      | intron | m6A-Label-seq:(High) | Functional Loss | T | G | 0.1353 | -0.0241 | 0.0027 | 7.30E-14 | eBMD |
| rs1050046  | RMVar_ID_869503  | m6A | 10 | 3779328   | KLF6        | 3_UTR  | Prediction:(Low)     | Functional Loss | G | A | 0.9210 | 0.0224  | 0.0034 | 4.70E-09 | eBMD |
| rs2461940  | RMVar_ID_551992  | m6A | 10 | 20116369  | PLXDC2      | intron | m6A-Label-seq:(High) | Functional Loss | T | C | 0.5203 | 0.0183  | 0.0018 | 4.60E-16 | eBMD |
| rs7078530  | RMVar_ID_878589  | m6A | 10 | 30697436  | SVIL2P      | exon   | Prediction:(Low)     | Functional Loss | G | A | 0.3711 | -0.0162 | 0.0019 | 1.10E-11 | eBMD |
| rs10160116 | RMVar_ID_839848  | m6A | 10 | 30849889  | ZNF438      | CDS    | MeRIP-seq:(Medium)   | Functional Loss | G | A | 0.6019 | 0.0119  | 0.0019 | 4.20E-09 | eBMD |
| rs10160116 | RMVar_ID_701909  | m6A | 10 | 30849889  | ZNF438      | CDS    | MeRIP-seq:(Medium)   | Functional Loss | G | A | 0.6019 | 0.0119  | 0.0019 | 4.20E-09 | eBMD |
| rs912805   | RMVar_ID_703728  | m6A | 10 | 43869258  | LINC00840   | exon   | m6A-Label-seq:(High) | Functional Loss | T | C | 0.5474 | -0.0123 | 0.0018 | 5.90E-10 | eBMD |
| rs912805   | RMVar_ID_840197  | m6A | 10 | 43869258  | LINC00840   | exon   | m6A-Label-seq:(High) | Functional Loss | T | C | 0.5474 | -0.0123 | 0.0018 | 5.90E-10 | eBMD |
| rs11002730 | RMVar_ID_213635  | m6A | 10 | 52611501  | LOC10537830 | exon   | m6A-Label-seq:(High) | Functional Loss | A | C | 0.4932 | 0.0309  | 0.0018 | 4.00E-53 | eBMD |
| rs1838062  | RMVar_ID_213636  | m6A | 10 | 52725689  | lnc-DKK1-5  | exon   | m6A-Label-seq:(High) | Functional Loss | A | G | 0.2437 | -0.0170 | 0.0022 | 6.80E-13 | eBMD |
| rs3824718  | RMVar_ID_665596  | m6A | 10 | 79313756  | ZMIZ1       | 3_UTR  | MeRIP-seq:(Medium)   | Functional Loss | C | G | 0.6530 | -0.0136 | 0.0019 | 5.80E-10 | eBMD |



|             |                 |     |    |           |            |        |                      |                 |   |   |        |         |        |          |      |
|-------------|-----------------|-----|----|-----------|------------|--------|----------------------|-----------------|---|---|--------|---------|--------|----------|------|
| rs3824718   | RMVar_ID_841863 | m6A | 10 | 79313756  | ZMIZ1      | 3_UTR  | MeRIP-seq:(Medium)   | Functional Loss | C | G | 0.6530 | -0.0136 | 0.0019 | 5.80E-10 | eBMD |
| rs10887869  | RMVar_ID_886280 | m6A | 10 | 80434933  | PRXL2A     | 3_UTR  | Prediction:(Low)     | Functional Loss | A | G | 0.4244 | -0.0136 | 0.0019 | 3.60E-11 | eBMD |
| rs10887869  | RMVar_ID_886281 | m6A | 10 | 80434933  | PRXL2A     | 3_UTR  | Prediction:(Low)     | Functional Loss | A | G | 0.4244 | -0.0136 | 0.0019 | 3.60E-11 | eBMD |
| rs1042606   | RMVar_ID_841957 | m6A | 10 | 110510918 | DUSP5      | 3_UTR  | MeRIP-seq:(Medium)   | Functional Loss | A | C | 0.3449 | 0.0144  | 0.0019 | 5.40E-12 | eBMD |
| rs1042606   | RMVar_ID_489721 | m6A | 10 | 110510918 | DUSP5      | 3_UTR  | MeRIP-seq:(Medium)   | Functional Loss | A | C | 0.3449 | 0.0144  | 0.0019 | 5.40E-12 | eBMD |
| rs10749457  | RMVar_ID_279731 | m6A | 10 | 122284546 | BTBD16     | intron | m6A-Label-seq:(High) | Functional Loss | A | T | 0.5366 | 0.0139  | 0.0018 | 1.70E-09 | eBMD |
| rs2421013   | RMVar_ID_873632 | m6A | 10 | 122329491 | BTBD16     | CDS    | Prediction:(Low)     | Functional Loss | G | A | 0.4925 | 0.0138  | 0.0018 | 7.70E-09 | eBMD |
| rs3794153   | RMVar_ID_860259 | m6A | 11 | 8730341   | DENND2B    | CDS    | MeRIP-seq:(Medium)   | Functional Loss | C | G | 0.5287 | -0.0164 | 0.0018 | 6.50E-15 | eBMD |
| rs3794153   | RMVar_ID_173554 | m6A | 11 | 8730341   | ST5        | CDS    | MeRIP-seq:(Medium)   | Functional Loss | C | G | 0.5287 | -0.0164 | 0.0018 | 6.50E-15 | eBMD |
| rs2568044   | RMVar_ID_116883 | m1A | 11 | 8980930   | NRIP3      | 3_UTR  | m1A-quant-seq:(High) | Functional Loss | T | C | 0.2224 | -0.0240 | 0.0022 | 2.40E-24 | eBMD |
| rs2568044   | RMVar_ID_58208  | m1A | 11 | 8980930   | NRIP3      | 3_UTR  | m1A-quant-seq:(High) | Functional Loss | T | C | 0.2224 | -0.0240 | 0.0022 | 2.40E-24 | eBMD |
| rs273605    | RMVar_ID_909338 | m6A | 11 | 30944310  | DCDC1      | intron | Prediction:(Low)     | Functional Loss | A | T | 0.3311 | 0.0126  | 0.0020 | 4.30E-09 | eBMD |
| rs1051006   | RMVar_ID_912539 | m6A | 11 | 47285038  | MADD       | CDS    | Prediction:(Low)     | Functional Gain | G | A | 0.8245 | -0.0211 | 0.0024 | 5.00E-15 | eBMD |
| rs7104653   | RMVar_ID_913374 | m6A | 11 | 50170422  | AC109635.4 | exon   | Prediction:(Low)     | Functional Loss | G | A | 0.8219 | -0.0190 | 0.0024 | 2.50E-14 | eBMD |
| rs7104653   | RMVar_ID_913375 | m6A | 11 | 50170422  | AC109635.4 | exon   | Prediction:(Low)     | Functional Loss | G | A | 0.8219 | -0.0190 | 0.0024 | 2.50E-14 | eBMD |
| rs185498344 | RMVar_ID_914514 | m6A | 11 | 58691535  | AP000445.1 | exon   | Prediction:(Low)     | Functional Loss | G | A | 0.9865 | -0.0591 | 0.0082 | 2.50E-11 | eBMD |
| rs174537    | RMVar_ID_915928 | m6A | 11 | 61785204  | MYRF       | intron | Prediction:(Low)     | Functional Gain | G | T | 0.6536 | -0.0156 | 0.0019 | 2.00E-13 | eBMD |
| rs4246215   | RMVar_ID_859077 | m6A | 11 | 61796828  | FEN1       | 3_UTR  | miCLIP&DART-seq:(Hig | Functional Loss | G | T | 0.6393 | -0.0145 | 0.0019 | 2.80E-12 | eBMD |
| rs4246215   | RMVar_ID_158742 | m6A | 11 | 61796828  | FEN1       | 3_UTR  | miCLIP&DART-seq:(Hig | Functional Loss | G | T | 0.6393 | -0.0145 | 0.0019 | 2.80E-12 | eBMD |
| rs4246215   | RMVar_ID_158741 | m6A | 11 | 61796828  | FEN1       | 3_UTR  | miCLIP&DART-seq:(Hig | Functional Loss | G | T | 0.6393 | -0.0145 | 0.0019 | 2.80E-12 | eBMD |
| rs3825071   | RMVar_ID_918786 | m6A | 11 | 65444649  | NEAT1      | exon   | Prediction:(Low)     | Functional Gain | C | T | 0.7825 | -0.0190 | 0.0022 | 3.70E-12 | eBMD |
| rs573673    | RMVar_ID_861831 | m6A | 11 | 66640602  | RBM4       | intron | MeRIP-seq:(Medium)   | Functional Loss | G | C | 0.9518 | -0.0317 | 0.0043 | 5.90E-12 | eBMD |
| rs573673    | RMVar_ID_164154 | m6A | 11 | 66640602  | RBM4       | intron | MeRIP-seq:(Medium)   | Functional Loss | G | C | 0.9518 | -0.0317 | 0.0043 | 5.90E-12 | eBMD |
| rs643892    | RMVar_ID_57343  | m1A | 11 | 68380985  | LRP5       | intron | MeRIP-seq:(Medium)   | Functional Loss | A | T | 0.3486 | -0.0250 | 0.0019 | 9.00E-31 | eBMD |
| rs643892    | RMVar_ID_57344  | m1A | 11 | 68380985  | LRP5       | intron | MeRIP-seq:(Medium)   | Functional Loss | A | T | 0.3486 | -0.0250 | 0.0019 | 9.00E-31 | eBMD |
| rs73516825  | RMVar_ID_165630 | m6A | 11 | 68447539  | LRP5       | intron | MeRIP-seq:(Medium)   | Functional Loss | C | A | 0.8925 | 0.0243  | 0.0030 | 1.50E-14 | eBMD |
| rs948852    | RMVar_ID_165689 | m6A | 11 | 68683106  | GAL        | intron | MeRIP-seq:(Medium)   | Functional Loss | G | T | 0.3041 | -0.0173 | 0.0020 | 1.80E-13 | eBMD |
| rs948852    | RMVar_ID_165688 | m6A | 11 | 68683106  | GAL        | intron | MeRIP-seq:(Medium)   | Functional Loss | G | T | 0.3041 | -0.0173 | 0.0020 | 1.80E-13 | eBMD |
| rs473997    | RMVar_ID_921592 | m6A | 11 | 68872010  | LINC02701  | exon   | Prediction:(Low)     | Functional Gain | C | T | 0.7160 | -0.0133 | 0.0020 | 2.80E-10 | eBMD |
| rs6590125   | RMVar_ID_862315 | m6A | 11 | 125087287 | SLC37A2    | intron | m6A-Label-seq:(High) | Functional Loss | T | G | 0.3513 | 0.0131  | 0.0019 | 2.40E-10 | eBMD |
| rs6590125   | RMVar_ID_475678 | m6A | 11 | 125087287 | SLC37A2    | intron | m6A-Label-seq:(High) | Functional Loss | T | G | 0.3513 | 0.0131  | 0.0019 | 2.40E-10 | eBMD |
| rs3017281   | RMVar_ID_86580  | m1A | 11 | 125569527 | EI24       | 5_UTR  | MeRIP-seq:(Medium)   | Functional Loss | T | C | 0.1187 | -0.0184 | 0.0028 | 3.30E-09 | eBMD |
| rs3017281   | RMVar_ID_116594 | m1A | 11 | 125569527 | EI24       | 5_UTR  | MeRIP-seq:(Medium)   | Functional Loss | T | C | 0.1187 | -0.0184 | 0.0028 | 3.30E-09 | eBMD |
| rs10773946  | RMVar_ID_530516 | m6A | 12 | 1492555   | ERC1       | 3_UTR  | MeRIP-seq:(Medium)   | Functional Loss | C | G | 0.1604 | -0.0202 | 0.0025 | 1.40E-11 | eBMD |
| rs10773946  | RMVar_ID_849060 | m6A | 12 | 1492555   | ERC1       | 3_UTR  | MeRIP-seq:(Medium)   | Functional Loss | C | G | 0.1604 | -0.0202 | 0.0025 | 1.40E-11 | eBMD |

|            |                  |        |    |           |             |        |                      |                 |   |   |        |         |        |          |      |
|------------|------------------|--------|----|-----------|-------------|--------|----------------------|-----------------|---|---|--------|---------|--------|----------|------|
| rs1841964  | RMVar_ID_946661  | m6A    | 12 | 28190074  | LOC729291   | exon   | Prediction:(Low)     | Functional Loss | G | A | 0.7481 | -0.0201 | 0.0021 | 7.10E-15 | eBMD |
| rs4573721  | RMVar_ID_546504  | m6A    | 12 | 28194746  | CCDC91      | intron | m6A-Label-seq:(High) | Functional Loss | T | A | 0.6850 | 0.0135  | 0.0020 | 1.90E-08 | eBMD |
| rs4573721  | RMVar_ID_850130  | m6A    | 12 | 28194746  | CCDC91      | intron | m6A-Label-seq:(High) | Functional Loss | T | A | 0.6850 | 0.0135  | 0.0020 | 1.90E-08 | eBMD |
| rs4760610  | RMVar_ID_950165  | m6A    | 12 | 48024449  | LOC10536975 | intron | Prediction:(Low)     | Functional Loss | C | T | 0.7533 | 0.0173  | 0.0021 | 1.60E-10 | eBMD |
| rs954      | RMVar_ID_463746  | m6A    | 12 | 48828436  | CACNB3      | 3_UTR  | MeRIP-seq:(Medium)   | Functional Loss | T | C | 0.7099 | -0.0199 | 0.0020 | 5.80E-21 | eBMD |
| rs7975791  | RMVar_ID_950701  | m6A    | 12 | 49019699  | KMT2D       | 3_UTR  | Prediction:(Low)     | Functional Gain | C | T | 0.9605 | 0.0385  | 0.0047 | 1.30E-11 | eBMD |
| rs168220   | RMVar_ID_507842  | m6A    | 12 | 65920979  | HMGA2       | intron | m6A-Label-seq:(High) | Functional Loss | A | T | 0.7661 | -0.0135 | 0.0022 | 3.20E-08 | eBMD |
| rs168220   | RMVar_ID_507841  | m6A    | 12 | 65920979  | HMGA2       | intron | m6A-Label-seq:(High) | Functional Loss | A | T | 0.7661 | -0.0135 | 0.0022 | 3.20E-08 | eBMD |
| rs73138102 | RMVar_ID_954142  | m6A    | 12 | 77831168  | NAV3        | 5_UTR  | Prediction:(Low)     | Functional Loss | A | T | 0.6144 | -0.0127 | 0.0019 | 7.10E-09 | eBMD |
| rs3741768  | RMVar_ID_939188  | m6A    | 12 | 116008655 | MED13L      | CDS    | Prediction:(Low)     | Functional Loss | C | T | 0.8244 | 0.0188  | 0.0024 | 1.30E-13 | eBMD |
| rs2695481  | RMVar_ID_54583   | A-to-I | 12 | 123158873 | MPHOSPH9    | intron | RNA-Seq:(High)       | Functional Loss | T | C | 0.2122 | -0.0176 | 0.0023 | 5.00E-11 | eBMD |
| rs2695481  | RMVar_ID_35417   | A-to-I | 12 | 123158873 | MPHOSPH9    | intron | RNA-Seq:(High)       | Functional Loss | T | C | 0.2122 | -0.0176 | 0.0023 | 5.00E-11 | eBMD |
| rs2851438  | RMVar_ID_54653   | A-to-I | 12 | 123159142 | MPHOSPH9    | intron | RNA-Seq:(High)       | Functional Loss | T | C | 0.2123 | -0.0176 | 0.0023 | 4.50E-11 | eBMD |
| rs2851438  | RMVar_ID_35419   | A-to-I | 12 | 123159142 | MPHOSPH9    | intron | RNA-Seq:(High)       | Functional Loss | T | C | 0.2123 | -0.0176 | 0.0023 | 4.50E-11 | eBMD |
| rs2695479  | RMVar_ID_35428   | A-to-I | 12 | 123204839 | MPHOSPH9    | intron | RNA-Seq:(High)       | Functional Loss | T | C | 0.2008 | -0.0189 | 0.0023 | 4.40E-12 | eBMD |
| rs11057192 | RMVar_ID_35432   | A-to-I | 12 | 123208873 | MPHOSPH9    | intron | RNA-Seq:(High)       | Functional Loss | T | C | 0.2105 | -0.0179 | 0.0023 | 2.50E-11 | eBMD |
| rs11057192 | RMVar_ID_54645   | A-to-I | 12 | 123208873 | MPHOSPH9    | intron | RNA-Seq:(High)       | Functional Loss | T | C | 0.2105 | -0.0179 | 0.0023 | 2.50E-11 | eBMD |
| rs11057192 | RMVar_ID_35433   | A-to-I | 12 | 123208873 | MPHOSPH9    | intron | RNA-Seq:(High)       | Functional Loss | T | C | 0.2105 | -0.0179 | 0.0023 | 2.50E-11 | eBMD |
| rs1533703  | RMVar_ID_544318  | m6A    | 12 | 123257546 | C12orf65    | 3_UTR  | MeRIP-seq:(Medium)   | Functional Loss | T | G | 0.2102 | -0.0184 | 0.0023 | 1.60E-11 | eBMD |
| rs1533703  | RMVar_ID_850444  | m6A    | 12 | 123257546 | MTRFR       | 3_UTR  | MeRIP-seq:(Medium)   | Functional Loss | T | G | 0.2102 | -0.0184 | 0.0023 | 1.60E-11 | eBMD |
| rs1060105  | RMVar_ID_852523  | m6A    | 12 | 123321671 | SBNO1       | CDS    | DART-seq:(High)      | Functional Loss | C | T | 0.7966 | 0.0192  | 0.0023 | 3.60E-12 | eBMD |
| rs1060105  | RMVar_ID_544369  | m6A    | 12 | 123321671 | SBNO1       | CDS    | DART-seq:(High)      | Functional Loss | C | T | 0.7966 | 0.0192  | 0.0023 | 3.60E-12 | eBMD |
| rs411746   | RMVar_ID_538120  | m6A    | 13 | 42229881  | DGKH        | 3_UTR  | m6A-Label-seq:(High) | Functional Loss | T | C | 0.0279 | 0.0398  | 0.0056 | 2.70E-09 | eBMD |
| rs806293   | RMVar_ID_692840  | m6A    | 13 | 50238846  | DLEU1       | intron | m6A-Label-seq:(High) | Functional Loss | T | A | 0.4674 | -0.0128 | 0.0019 | 1.10E-09 | eBMD |
| rs9557132  | RMVar_ID_833994  | m6A    | 13 | 99072023  | DOCK9       | intron | MeRIP-seq:(Medium)   | Functional Loss | C | G | 0.7990 | -0.0283 | 0.0023 | 1.30E-28 | eBMD |
| rs9557132  | RMVar_ID_731210  | m6A    | 13 | 99072023  | DOCK9       | intron | MeRIP-seq:(Medium)   | Functional Loss | C | G | 0.7990 | -0.0283 | 0.0023 | 1.30E-28 | eBMD |
| rs728982   | RMVar_ID_731215  | m6A    | 13 | 99087486  | DOCK9-DT    | exon   | miCLIP:(High)        | Functional Loss | T | G | 0.7297 | -0.0190 | 0.0021 | 3.10E-16 | eBMD |
| rs7329444  | RMVar_ID_731367  | m6A    | 13 | 99969109  | ZIC5        | intron | miCLIP:(High)        | Functional Loss | G | C | 0.1961 | 0.0206  | 0.0023 | 7.20E-16 | eBMD |
| rs3181248  | RMVar_ID_974593  | m6A    | 14 | 24338946  | RIPK3       | intron | Prediction:(Low)     | Functional Loss | G | A | 0.4125 | -0.0133 | 0.0019 | 3.40E-09 | eBMD |
| rs2275145  | RMVar_ID_1597586 | m7G    | 14 | 34773622  | BAZ1A       | CDS    | MeRIP-seq:(Medium)   | Functional Loss | G | A | 0.4927 | -0.0113 | 0.0019 | 2.30E-08 | eBMD |
| rs2275145  | RMVar_ID_1571302 | m7G    | 14 | 34773622  | BAZ1A       | CDS    | MeRIP-seq:(Medium)   | Functional Loss | G | A | 0.4927 | -0.0113 | 0.0019 | 2.30E-08 | eBMD |
| rs2275145  | RMVar_ID_1571301 | m7G    | 14 | 34773622  | BAZ1A       | CDS    | MeRIP-seq:(Medium)   | Functional Loss | G | A | 0.4927 | -0.0113 | 0.0019 | 2.30E-08 | eBMD |
| rs10131094 | RMVar_ID_25696   | A-to-I | 14 | 34819432  | BAZ1A       | intron | RNA-Seq:(High)       | Functional Loss | T | C | 0.3904 | -0.0166 | 0.0019 | 7.60E-17 | eBMD |
| rs2145031  | RMVar_ID_975622  | m6A    | 14 | 34874427  | BAZ1A-AS1   | exon   | Prediction:(Low)     | Functional Loss | A | C | 0.7110 | 0.0163  | 0.0020 | 1.80E-13 | eBMD |
| rs2273154  | RMVar_ID_975647  | m6A    | 14 | 34963988  | SRP54-AS1   | exon   | Prediction:(Low)     | Functional Gain | C | T | 0.8104 | -0.0176 | 0.0024 | 1.30E-10 | eBMD |

|             |                  |     |    |           |             |            |                       |                 |   |   |        |         |        |          |      |
|-------------|------------------|-----|----|-----------|-------------|------------|-----------------------|-----------------|---|---|--------|---------|--------|----------|------|
| rs28384418  | RMVar_ID_975656  | m6A | 14 | 34982888  | SRP54       | 5_UTR      | Prediction:(Low)      | Functional Loss | C | A | 0.7351 | -0.0141 | 0.0021 | 1.50E-09 | eBMD |
| rs7158047   | RMVar_ID_798253  | m6A | 14 | 74922101  | RPS6KL1     | 5_UTR      | m6A-Seal-seq:(Medium) | Functional Loss | G | A | 0.4123 | -0.0123 | 0.0019 | 4.90E-10 | eBMD |
| rs7158047   | RMVar_ID_327376  | m6A | 14 | 74922101  | RPS6KL1     | 5_UTR      | m6A-Seal-seq:(Medium) | Functional Loss | G | A | 0.4123 | -0.0123 | 0.0019 | 4.90E-10 | eBMD |
| rs12890371  | RMVar_ID_983316  | m6A | 14 | 75127134  | NEK9        | 5_UTR      | Prediction:(Low)      | Functional Gain | T | C | 0.5246 | -0.0141 | 0.0019 | 5.40E-11 | eBMD |
| rs61217816  | RMVar_ID_987115  | m6A | 14 | 95184708  | CLMN        | 3_UTR      | Prediction:(Low)      | Functional Gain | T | C | 0.9132 | 0.0251  | 0.0033 | 2.90E-12 | eBMD |
| rs3814816   | RMVar_ID_987118  | m6A | 14 | 95185430  | CLMN        | 3_UTR      | Prediction:(Low)      | Functional Gain | G | A | 0.9133 | 0.0252  | 0.0033 | 2.70E-12 | eBMD |
| rs861530    | RMVar_ID_989646  | m6A | 14 | 103707783 | XRCC3       | intron     | Prediction:(Low)      | Functional Loss | T | C | 0.3003 | 0.0139  | 0.0020 | 4.80E-09 | eBMD |
| rs4900592   | RMVar_ID_989695  | m6A | 14 | 103710762 | XRCC3       | intron     | Prediction:(Low)      | Functional Loss | G | T | 0.6733 | -0.0154 | 0.0020 | 6.40E-12 | eBMD |
| rs4900592   | RMVar_ID_989694  | m6A | 14 | 103710762 | XRCC3       | intron     | Prediction:(Low)      | Functional Loss | G | T | 0.6733 | -0.0154 | 0.0020 | 6.40E-12 | eBMD |
| rs2295146   | RMVar_ID_206284  | m6A | 14 | 103733018 | ZFYVE21     | stop codon | DART-seq:(High)       | Functional Loss | C | T | 0.6045 | -0.0119 | 0.0019 | 1.00E-08 | eBMD |
| rs2295146   | RMVar_ID_801447  | m6A | 14 | 103733018 | ZFYVE21     | stop codon | DART-seq:(High)       | Functional Loss | C | T | 0.6045 | -0.0119 | 0.0019 | 1.00E-08 | eBMD |
| rs732762    | RMVar_ID_651150  | m6A | 15 | 51183689  | MIR4713HG   | exon       | m6A-Label-seq:(High)  | Functional Loss | T | C | 0.3582 | 0.0216  | 0.0019 | 9.00E-25 | eBMD |
| rs732762    | RMVar_ID_651151  | m6A | 15 | 51183689  | MIR4713HG   | exon       | m6A-Label-seq:(High)  | Functional Loss | T | C | 0.3582 | 0.0216  | 0.0019 | 9.00E-25 | eBMD |
| rs12050772  | RMVar_ID_651160  | m6A | 15 | 51252674  | CYP19A1     | intron     | m6A-Label-seq:(High)  | Functional Loss | T | G | 0.5383 | -0.0267 | 0.0019 | 7.40E-38 | eBMD |
| rs8030077   | RMVar_ID_1003424 | m6A | 15 | 63637037  | HERC1       | intron     | Prediction:(Low)      | Functional Gain | T | A | 0.8752 | -0.0223 | 0.0028 | 1.00E-13 | eBMD |
| rs8031179   | RMVar_ID_96606   | m1A | 15 | 65659696  | DENND4A     | CDS        | m1A-quant-seq:(High)  | Functional Loss | T | C | 0.5715 | 0.0126  | 0.0019 | 1.60E-09 | eBMD |
| rs8031179   | RMVar_ID_96607   | m1A | 15 | 65659696  | DENND4A     | CDS        | m1A-quant-seq:(High)  | Functional Loss | T | C | 0.5715 | 0.0126  | 0.0019 | 1.60E-09 | eBMD |
| rs2727100   | RMVar_ID_1004240 | m6A | 15 | 65771221  | DENND4A     | intron     | Prediction:(Low)      | Functional Loss | G | A | 0.8295 | 0.0224  | 0.0025 | 3.30E-15 | eBMD |
| rs3751655   | RMVar_ID_567123  | m6A | 15 | 90228518  | SEMA4B      | CDS        | MeRIP-seq:(Medium)    | Functional Loss | T | G | 0.3480 | 0.0123  | 0.0020 | 4.40E-08 | eBMD |
| rs3751655   | RMVar_ID_774378  | m6A | 15 | 90228518  | SEMA4B      | CDS        | MeRIP-seq:(Medium)    | Functional Loss | T | G | 0.3480 | 0.0123  | 0.0020 | 4.40E-08 | eBMD |
| rs3751655   | RMVar_ID_567124  | m6A | 15 | 90228518  | SEMA4B      | CDS        | MeRIP-seq:(Medium)    | Functional Loss | T | G | 0.3480 | 0.0123  | 0.0020 | 4.40E-08 | eBMD |
| rs7174198   | RMVar_ID_1013412 | m6A | 15 | 90539952  | CRTC3       | intron     | Prediction:(Low)      | Functional Gain | C | T | 0.7928 | 0.0174  | 0.0023 | 2.10E-11 | eBMD |
| rs112865841 | RMVar_ID_1016623 | m6A | 16 | 384348    | LOC10537103 | exon       | Prediction:(Low)      | Functional Loss | G | T | 0.7932 | 0.0174  | 0.0023 | 2.60E-11 | eBMD |
| rs7203729   | RMVar_ID_72951   | m1A | 16 | 2090009   | PKD1        | CDS        | MeRIP-seq:(Medium)    | Functional Loss | A | G | 0.8152 | -0.0201 | 0.0024 | 4.10E-15 | eBMD |
| rs7203729   | RMVar_ID_72950   | m1A | 16 | 2090009   | PKD1        | CDS        | MeRIP-seq:(Medium)    | Functional Loss | A | G | 0.8152 | -0.0201 | 0.0024 | 4.10E-15 | eBMD |
| rs7203729   | RMVar_ID_72952   | m1A | 16 | 2090009   | PKD1        | CDS        | MeRIP-seq:(Medium)    | Functional Loss | A | G | 0.8152 | -0.0201 | 0.0024 | 4.10E-15 | eBMD |
| rs2531988   | RMVar_ID_335564  | m6A | 16 | 3978416   | ADCY9       | intron     | m6A-Label-seq:(High)  | Functional Loss | T | G | 0.1656 | -0.0232 | 0.0025 | 1.80E-16 | eBMD |
| rs2531988   | RMVar_ID_335563  | m6A | 16 | 3978416   | ADCY9       | intron     | m6A-Label-seq:(High)  | Functional Loss | T | G | 0.1656 | -0.0232 | 0.0025 | 1.80E-16 | eBMD |
| rs2283479   | RMVar_ID_1021977 | m6A | 16 | 4264526   | TFAP4       | intron     | Prediction:(Low)      | Functional Loss | C | A | 0.4980 | 0.0115  | 0.0019 | 1.40E-09 | eBMD |
| rs2283479   | RMVar_ID_1021976 | m6A | 16 | 4264526   | TFAP4       | intron     | Prediction:(Low)      | Functional Loss | C | A | 0.4980 | 0.0115  | 0.0019 | 1.40E-09 | eBMD |
| rs3803716   | RMVar_ID_264706  | m6A | 16 | 24791003  | TNRC6A      | CDS        | miCLIP:(High)         | Functional Loss | C | T | 0.8044 | 0.0141  | 0.0023 | 2.30E-08 | eBMD |
| rs3803716   | RMVar_ID_787406  | m6A | 16 | 24791003  | TNRC6A      | CDS        | miCLIP:(High)         | Functional Loss | C | T | 0.8044 | 0.0141  | 0.0023 | 2.30E-08 | eBMD |
| rs7201      | RMVar_ID_113153  | m1A | 16 | 55505702  | MMP2        | 3_UTR      | m1A-quant-seq:(High)  | Functional Loss | A | C | 0.5411 | -0.0114 | 0.0019 | 1.30E-09 | eBMD |
| rs7201      | RMVar_ID_95218   | m1A | 16 | 55505702  | MMP2        | 3_UTR      | m1A-quant-seq:(High)  | Functional Loss | A | C | 0.5411 | -0.0114 | 0.0019 | 1.30E-09 | eBMD |
| rs61733768  | RMVar_ID_1037335 | m6A | 16 | 67180056  | KIAA0895L   | CDS        | Prediction:(Low)      | Functional Loss | G | A | 0.9708 | 0.0760  | 0.0055 | 7.70E-36 | eBMD |

|             |                  |        |    |          |           |        |                      |                 |   |   |        |         |        |          |          |
|-------------|------------------|--------|----|----------|-----------|--------|----------------------|-----------------|---|---|--------|---------|--------|----------|----------|
| rs8053031   | RMVar_ID_547385  | m6A    | 16 | 67264260 | SLC9A5    | intron | m6A-Label-seq:(High) | Functional Loss | T | G | 0.9690 | 0.0696  | 0.0053 | 2.70E-34 | eBMD     |
| rs143837268 | RMVar_ID_1037747 | m6A    | 16 | 67620779 | CTCF      | CDS    | Prediction:(Low)     | Functional Gain | C | T | 0.9818 | 0.0561  | 0.0069 | 1.00E-15 | eBMD     |
| rs118016432 | RMVar_ID_35774   | A-to-I | 16 | 67772793 | RANBP10   | intron | RNA-Seq:(High)       | Functional Loss | T | C | 0.9696 | 0.0321  | 0.0054 | 1.90E-09 | eBMD     |
| rs216196    | RMVar_ID_673575  | m6A    | 17 | 2299651  | SMG6      | CDS    | MeRIP-seq:(Medium)   | Functional Loss | T | C | 0.7229 | 0.0457  | 0.0021 | 1.20E-88 | eBMD     |
| rs216196    | RMVar_ID_778992  | m6A    | 17 | 2299651  | SMG6      | CDS    | MeRIP-seq:(Medium)   | Functional Loss | T | C | 0.7229 | 0.0457  | 0.0021 | 1.20E-88 | eBMD     |
| rs1885987   | RMVar_ID_673582  | m6A    | 17 | 2299731  | SMG6      | CDS    | MeRIP-seq:(Medium)   | Functional Loss | T | G | 0.6292 | -0.0138 | 0.0019 | 7.70E-10 | eBMD     |
| rs1885987   | RMVar_ID_673583  | m6A    | 17 | 2299731  | SMG6      | CDS    | MeRIP-seq:(Medium)   | Functional Loss | T | G | 0.6292 | -0.0138 | 0.0019 | 7.70E-10 | eBMD     |
| rs1885987   | RMVar_ID_782642  | m6A    | 17 | 2299731  | SMG6      | CDS    | MeRIP-seq:(Medium)   | Functional Loss | T | G | 0.6292 | -0.0138 | 0.0019 | 7.70E-10 | eBMD     |
| rs216194    | RMVar_ID_45835   | A-to-I | 17 | 2300054  | SMG6      | CDS    | RNA-Seq:(High)       | Functional Loss | T | C | 0.1544 | 0.0190  | 0.0026 | 1.10E-11 | eBMD     |
| rs216194    | RMVar_ID_53094   | A-to-I | 17 | 2300054  | SMG6      | CDS    | RNA-Seq:(High)       | Functional Loss | T | C | 0.1544 | 0.0190  | 0.0026 | 1.10E-11 | eBMD     |
| rs2248821   | RMVar_ID_1048429 | m6A    | 17 | 2365021  | SGSM2     | CDS    | Prediction:(Low)     | Functional Gain | G | A | 0.5414 | 0.0128  | 0.0019 | 7.80E-10 | eBMD     |
| rs4450459   | RMVar_ID_46132   | A-to-I | 17 | 7493298  | POLR2A    | intron | RNA-Seq:(High)       | Functional Loss | A | G | 0.0379 | 0.0293  | 0.0048 | 1.80E-08 | eBMD     |
| rs4450459   | RMVar_ID_46131   | A-to-I | 17 | 7493298  | POLR2A    | intron | RNA-Seq:(High)       | Functional Loss | A | G | 0.0379 | 0.0293  | 0.0048 | 1.80E-08 | eBMD     |
| rs4791806   | RMVar_ID_677414  | m6A    | 17 | 7825866  | DNAH2     | intron | m6A-Label-seq:(High) | Functional Loss | A | G | 0.1848 | -0.0185 | 0.0024 | 1.70E-12 | eBMD     |
| rs62623385  | RMVar_ID_677678  | m6A    | 17 | 7944520  | CNTROB    | CDS    | miCLIP:(High)        | Functional Loss | A | T | 0.9658 | -0.0346 | 0.0051 | 1.90E-08 | eBMD     |
| rs62066870  | RMVar_ID_198668  | m6A    | 17 | 20160445 | SPECC1    | intron | m6A-Label-seq:(High) | Functional Loss | A | C | 0.3879 | -0.0107 | 0.0019 | 4.20E-08 | eBMD     |
| rs62066870  | RMVar_ID_784802  | m6A    | 17 | 20160445 | SPECC1    | intron | m6A-Label-seq:(High) | Functional Loss | A | C | 0.3879 | -0.0107 | 0.0019 | 4.20E-08 | eBMD     |
| rs4564638   | RMVar_ID_1060931 | m6A    | 17 | 31526528 | RAB11FIP4 | intron | Prediction:(Low)     | Functional Gain | T | C | 0.3606 | 0.0118  | 0.0019 | 4.40E-08 | eBMD     |
| rs668799    | RMVar_ID_1066384 | m6A    | 17 | 42564192 | COASY     | intron | Prediction:(Low)     | Functional Loss | C | T | 0.7207 | -0.0131 | 0.0021 | 1.50E-09 | eBMD     |
| rs1983490   | RMVar_ID_1067271 | m6A    | 17 | 43705591 | LINC02594 | exon   | Prediction:(Low)     | Functional Loss | G | A | 0.6200 | -0.0385 | 0.0019 | 1.40E-68 | eBMD     |
| rs1983490   | RMVar_ID_1067271 | m6A    | 17 | 43705591 | LINC02594 | exon   | Prediction:(Low)     | Functional Loss | G | A | 0.6200 | 0.0499  | 0.0068 | 3.60E-13 | Fracture |
| rs2342312   | RMVar_ID_729724  | m6A    | 17 | 43719885 | WHSC1L2P  | exon   | MeRIP-seq:(Medium)   | Functional Loss | C | G | 0.6813 | -0.0408 | 0.0020 | 4.70E-72 | eBMD     |
| rs2342312   | RMVar_ID_781655  | m6A    | 17 | 43719885 | WHSC1L2P  | exon   | MeRIP-seq:(Medium)   | Functional Loss | C | G | 0.6813 | -0.0408 | 0.0020 | 4.70E-72 | eBMD     |
| rs2342312   | RMVar_ID_729725  | m6A    | 17 | 43719885 | WHSC1L2P  | exon   | MeRIP-seq:(Medium)   | Functional Loss | C | G | 0.6813 | -0.0408 | 0.0020 | 4.70E-72 | eBMD     |
| rs2342312   | RMVar_ID_729725  | m6A    | 17 | 43719885 | WHSC1L2P  | exon   | MeRIP-seq:(Medium)   | Functional Loss | C | G | 0.6812 | 0.0518  | 0.0071 | 4.40E-13 | Fracture |
| rs2342312   | RMVar_ID_729724  | m6A    | 17 | 43719885 | WHSC1L2P  | exon   | MeRIP-seq:(Medium)   | Functional Loss | C | G | 0.6812 | 0.0518  | 0.0071 | 4.40E-13 | Fracture |
| rs2342312   | RMVar_ID_781655  | m6A    | 17 | 43719885 | WHSC1L2P  | exon   | MeRIP-seq:(Medium)   | Functional Loss | C | G | 0.6812 | 0.0518  | 0.0071 | 4.40E-13 | Fracture |
| rs2537      | RMVar_ID_1592717 | m7G    | 17 | 43875439 | MPP2      | 3_UTR  | MeRIP-seq:(Medium)   | Functional Loss | G | A | 0.9417 | 0.0396  | 0.0040 | 5.20E-18 | eBMD     |
| rs228758    | RMVar_ID_729828  | m6A    | 17 | 44070835 | G6PC3     | 5_UTR  | MeRIP-seq:(Medium)   | Functional Loss | C | T | 0.4528 | 0.0213  | 0.0019 | 5.50E-24 | eBMD     |
| rs227584    | RMVar_ID_112460  | m1A    | 17 | 44148179 | HROB      | CDS    | m1A-quant-seq:(High) | Functional Loss | A | C | 0.7078 | -0.0318 | 0.0020 | 1.70E-41 | eBMD     |
| rs227584    | RMVar_ID_109095  | m1A    | 17 | 44148179 | HROB      | CDS    | m1A-quant-seq:(High) | Functional Loss | A | C | 0.7078 | -0.0318 | 0.0020 | 1.70E-41 | eBMD     |
| rs227584    | RMVar_ID_109095  | m1A    | 17 | 44148179 | HROB      | CDS    | m1A-quant-seq:(High) | Functional Loss | A | C | 0.7078 | 0.0466  | 0.0072 | 6.90E-11 | Fracture |
| rs227584    | RMVar_ID_112460  | m1A    | 17 | 44148179 | HROB      | CDS    | m1A-quant-seq:(High) | Functional Loss | A | C | 0.7078 | 0.0466  | 0.0072 | 6.90E-11 | Fracture |
| rs8079310   | RMVar_ID_1067620 | m6A    | 17 | 44192930 | ATXN7L3   | 3_UTR  | Prediction:(Low)     | Functional Gain | A | G | 0.7068 | -0.0322 | 0.0020 | 1.80E-42 | eBMD     |
| rs8079310   | RMVar_ID_1067620 | m6A    | 17 | 44192930 | ATXN7L3   | 3_UTR  | Prediction:(Low)     | Functional Gain | A | G | 0.7068 | 0.0461  | 0.0072 | 1.20E-10 | Fracture |

|            |                  |        |    |          |         |        |                      |                 |   |   |        |         |        |          |      |
|------------|------------------|--------|----|----------|---------|--------|----------------------|-----------------|---|---|--------|---------|--------|----------|------|
| rs2526011  | RMVar_ID_109112  | m1A    | 17 | 44210760 | UBTF    | intron | MeRIP-seq:(Medium)   | Functional Loss | T | G | 0.9057 | -0.0296 | 0.0032 | 1.10E-15 | eBMD |
| rs2526011  | RMVar_ID_109113  | m1A    | 17 | 44210760 | UBTF    | intron | MeRIP-seq:(Medium)   | Functional Loss | T | G | 0.9057 | -0.0296 | 0.0032 | 1.10E-15 | eBMD |
| rs2526011  | RMVar_ID_109111  | m1A    | 17 | 44210760 | UBTF    | intron | MeRIP-seq:(Medium)   | Functional Loss | T | G | 0.9057 | -0.0296 | 0.0032 | 1.10E-15 | eBMD |
| rs2526011  | RMVar_ID_112590  | m1A    | 17 | 44210760 | UBTF    | intron | MeRIP-seq:(Medium)   | Functional Loss | T | G | 0.9057 | -0.0296 | 0.0032 | 1.10E-15 | eBMD |
| rs2239918  | RMVar_ID_591762  | m6A    | 17 | 45091741 | NMT1    | intron | m6A-Label-seq:(High) | Functional Loss | T | A | 0.5464 | 0.0112  | 0.0019 | 4.70E-08 | eBMD |
| rs1132898  | RMVar_ID_1068236 | m6A    | 17 | 45093784 | NMT1    | CDS    | Prediction:(Low)     | Functional Gain | C | T | 0.7855 | 0.0208  | 0.0023 | 2.20E-15 | eBMD |
| rs1132898  | RMVar_ID_1068237 | m6A    | 17 | 45093784 | NMT1    | CDS    | Prediction:(Low)     | Functional Gain | C | T | 0.7855 | 0.0208  | 0.0023 | 2.20E-15 | eBMD |
| rs1879581  | RMVar_ID_592128  | m6A    | 17 | 45468529 | PLEKHM1 | CDS    | MeRIP-seq:(Medium)   | Functional Loss | T | C | 0.8156 | 0.0242  | 0.0024 | 1.50E-20 | eBMD |
| rs385691   | RMVar_ID_1068835 | m6A    | 17 | 45648759 | CRHR1   | intron | Prediction:(Low)     | Functional Loss | A | C | 0.7751 | 0.0232  | 0.0022 | 2.60E-21 | eBMD |
| rs385691   | RMVar_ID_1068836 | m6A    | 17 | 45648759 | CRHR1   | intron | Prediction:(Low)     | Functional Loss | A | C | 0.7751 | 0.0232  | 0.0022 | 2.60E-21 | eBMD |
| rs366858   | RMVar_ID_1068841 | m6A    | 17 | 45649244 | CRHR1   | intron | Prediction:(Low)     | Functional Loss | C | T | 0.7751 | 0.0232  | 0.0022 | 2.70E-21 | eBMD |
| rs76324150 | RMVar_ID_1068953 | m6A    | 17 | 45895887 | MAPT    | intron | Prediction:(Low)     | Functional Loss | C | T | 0.7749 | 0.0231  | 0.0022 | 5.00E-21 | eBMD |
| rs4792891  | RMVar_ID_1068959 | m6A    | 17 | 45896140 | MAPT    | intron | Prediction:(Low)     | Functional Gain | T | G | 0.6622 | 0.0165  | 0.0020 | 7.30E-16 | eBMD |
| rs17650901 | RMVar_ID_592266  | m6A    | 17 | 45962325 | MAPT    | 5_UTR  | MeRIP-seq:(Medium)   | Functional Loss | A | G | 0.7749 | 0.0231  | 0.0022 | 7.10E-21 | eBMD |
| rs7350928  | RMVar_ID_1583196 | m7G    | 17 | 46030734 | KANSL1  | 3_UTR  | MeRIP-seq:(Medium)   | Functional Loss | C | T | 0.7749 | 0.0230  | 0.0022 | 1.00E-20 | eBMD |
| rs7350928  | RMVar_ID_1583197 | m7G    | 17 | 46030734 | KANSL1  | 3_UTR  | MeRIP-seq:(Medium)   | Functional Loss | C | T | 0.7749 | 0.0230  | 0.0022 | 1.00E-20 | eBMD |
| rs17574425 | RMVar_ID_1069086 | m6A    | 17 | 46031828 | KANSL1  | intron | Prediction:(Low)     | Functional Gain | C | G | 0.7749 | 0.0231  | 0.0022 | 9.30E-21 | eBMD |
| rs1881193  | RMVar_ID_39617   | A-to-I | 17 | 46171403 | KANSL1  | CDS    | RNA-Seq:(High)       | Functional Loss | T | C | 0.7744 | 0.0232  | 0.0022 | 4.80E-21 | eBMD |
| rs1881193  | RMVar_ID_39616   | A-to-I | 17 | 46171403 | KANSL1  | CDS    | RNA-Seq:(High)       | Functional Loss | T | C | 0.7744 | 0.0232  | 0.0022 | 4.80E-21 | eBMD |
| rs58872582 | RMVar_ID_609051  | m6A    | 17 | 60810499 | BCAS3   | intron | MeRIP-seq:(Medium)   | Functional Loss | A | G | 0.8965 | -0.0519 | 0.0030 | 1.50E-48 | eBMD |
| rs1991401  | RMVar_ID_1075834 | m6A    | 17 | 64506321 | DDX5    | 5_UTR  | Prediction:(Low)     | Functional Loss | A | G | 0.6861 | 0.0171  | 0.0020 | 2.40E-17 | eBMD |
| rs34587622 | RMVar_ID_629638  | m6A    | 17 | 77402414 | SEPTIN9 | CDS    | MeRIP-seq:(Medium)   | Functional Loss | C | T | 0.8879 | 0.0173  | 0.0029 | 1.90E-08 | eBMD |
| rs8074498  | RMVar_ID_633489  | m6A    | 17 | 81996666 | ASPSCR1 | CDS    | miCLIP:(High)        | Functional Loss | T | A | 0.4183 | 0.0114  | 0.0019 | 8.00E-10 | eBMD |
| rs12453001 | RMVar_ID_1084606 | m6A    | 17 | 82577259 | FO XK2  | intron | Prediction:(Low)     | Functional Loss | T | A | 0.3648 | -0.0186 | 0.0019 | 4.80E-20 | eBMD |
| rs61735998 | RMVar_ID_1090719 | m6A    | 18 | 36709302 | FHOD3   | CDS    | Prediction:(Low)     | Functional Loss | G | T | 0.9743 | -0.0412 | 0.0059 | 3.30E-09 | eBMD |
| rs978572   | RMVar_ID_566098  | m6A    | 18 | 62254957 | RELCH   | intron | m6A-Label-seq:(High) | Functional Loss | T | C | 0.2663 | -0.0141 | 0.0021 | 3.00E-10 | eBMD |
| rs978572   | RMVar_ID_566097  | m6A    | 18 | 62254957 | RELCH   | intron | m6A-Label-seq:(High) | Functional Loss | T | C | 0.2663 | -0.0141 | 0.0021 | 3.00E-10 | eBMD |
| rs3180287  | RMVar_ID_1608266 | m7G    | 19 | 804396   | PTBP1   | CDS    | MeRIP-seq:(Medium)   | Functional Loss | C | T | 0.8616 | 0.0225  | 0.0027 | 1.50E-15 | eBMD |
| rs3180287  | RMVar_ID_1600467 | m7G    | 19 | 804396   | PTBP1   | CDS    | MeRIP-seq:(Medium)   | Functional Loss | C | T | 0.8616 | 0.0225  | 0.0027 | 1.50E-15 | eBMD |
| rs3180287  | RMVar_ID_1569293 | m7G    | 19 | 804396   | PTBP1   | CDS    | MeRIP-seq:(Medium)   | Functional Loss | C | T | 0.8616 | 0.0225  | 0.0027 | 1.50E-15 | eBMD |
| rs3180287  | RMVar_ID_1569292 | m7G    | 19 | 804396   | PTBP1   | CDS    | MeRIP-seq:(Medium)   | Functional Loss | C | T | 0.8616 | 0.0225  | 0.0027 | 1.50E-15 | eBMD |
| rs4807205  | RMVar_ID_417454  | m6A    | 19 | 2167879  | DOT1L   | intron | m6A-Label-seq:(High) | Functional Loss | A | G | 0.5389 | 0.0148  | 0.0019 | 8.00E-13 | eBMD |
| rs10405636 | RMVar_ID_55387   | m1A    | 19 | 18427932 | SSBP4   | CDS    | MeRIP-seq:(Medium)   | Functional Loss | A | C | 0.6439 | -0.0139 | 0.0019 | 1.10E-12 | eBMD |
| rs10405636 | RMVar_ID_111580  | m1A    | 19 | 18427932 | SSBP4   | CDS    | MeRIP-seq:(Medium)   | Functional Loss | A | C | 0.6439 | -0.0139 | 0.0019 | 1.10E-12 | eBMD |
| rs2041109  | RMVar_ID_309220  | m6A    | 19 | 57291437 | ZNF460  | CDS    | MeRIP-seq:(Medium)   | Functional Loss | C | T | 0.7392 | 0.0113  | 0.0021 | 9.00E-09 | eBMD |

|            |                  |     |    |          |             |        |                       |                 |   |   |        |         |        |          |      |
|------------|------------------|-----|----|----------|-------------|--------|-----------------------|-----------------|---|---|--------|---------|--------|----------|------|
| rs2041109  | RMVar_ID_768500  | m6A | 19 | 57291437 | ZNF460      | CDS    | MeRIP-seq:(Medium)    | Functional Loss | C | T | 0.7392 | 0.0113  | 0.0021 | 9.00E-09 | eBMD |
| rs2041109  | RMVar_ID_309221  | m6A | 19 | 57291437 | ZNF460      | CDS    | MeRIP-seq:(Medium)    | Functional Loss | C | T | 0.7392 | 0.0113  | 0.0021 | 9.00E-09 | eBMD |
| rs235768   | RMVar_ID_856230  | m6A | 20 | 6778468  | BMP2        | CDS    | m6A-Label-seq&miCLIP: | Functional Loss | A | T | 0.3904 | -0.0126 | 0.0019 | 2.10E-09 | eBMD |
| rs235768   | RMVar_ID_395129  | m6A | 20 | 6778468  | BMP2        | CDS    | m6A-Label-seq&miCLIP: | Functional Loss | A | T | 0.3904 | -0.0126 | 0.0019 | 2.10E-09 | eBMD |
| rs235768   | RMVar_ID_395128  | m6A | 20 | 6778468  | BMP2        | CDS    | m6A-Label-seq&miCLIP: | Functional Loss | A | T | 0.3904 | -0.0126 | 0.0019 | 2.10E-09 | eBMD |
| rs13037675 | RMVar_ID_395152  | m6A | 20 | 6779058  | BMP2        | CDS    | miCLIP:(High)         | Functional Loss | C | T | 0.9274 | -0.0402 | 0.0036 | 1.20E-20 | eBMD |
| rs6040041  | RMVar_ID_395358  | m6A | 20 | 10603861 | SLX4IP      | intron | m6A-Label-seq:(High)  | Functional Loss | A | G | 0.3268 | 0.0120  | 0.0020 | 3.10E-08 | eBMD |
| rs6040041  | RMVar_ID_395359  | m6A | 20 | 10603861 | SLX4IP      | intron | m6A-Label-seq:(High)  | Functional Loss | A | G | 0.3268 | 0.0120  | 0.0020 | 3.10E-08 | eBMD |
| rs6040041  | RMVar_ID_855124  | m6A | 20 | 10603861 | SLX4IP      | intron | m6A-Label-seq:(High)  | Functional Loss | A | G | 0.3268 | 0.0120  | 0.0020 | 3.10E-08 | eBMD |
| rs61364340 | RMVar_ID_395410  | m6A | 20 | 10623983 | SLX4IP      | 3_UTR  | miCLIP:(High)         | Functional Loss | A | G | 0.9190 | 0.0356  | 0.0034 | 2.90E-22 | eBMD |
| rs80233229 | RMVar_ID_395455  | m6A | 20 | 10666195 | JAG1        | intron | m6A-Label-seq:(High)  | Functional Loss | T | C | 0.8894 | 0.0430  | 0.0030 | 4.70E-38 | eBMD |
| rs7353058  | RMVar_ID_395464  | m6A | 20 | 10794845 | LOC10798539 | exon   | m6A-Label-seq:(High)  | Functional Loss | T | C | 0.6370 | 0.0134  | 0.0019 | 2.20E-09 | eBMD |
| rs7353058  | RMVar_ID_856310  | m6A | 20 | 10794845 | LOC10798539 | exon   | m6A-Label-seq:(High)  | Functional Loss | T | C | 0.6370 | 0.0134  | 0.0019 | 2.20E-09 | eBMD |
| rs291700   | RMVar_ID_107996  | m1A | 20 | 33394043 | CDK5RAP1    | CDS    | m1A-quant-seq:(High)  | Functional Loss | T | C | 0.3179 | 0.0149  | 0.0020 | 6.80E-15 | eBMD |
| rs291700   | RMVar_ID_116480  | m1A | 20 | 33394043 | CDK5RAP1    | CDS    | m1A-quant-seq:(High)  | Functional Loss | T | C | 0.3179 | 0.0149  | 0.0020 | 6.80E-15 | eBMD |
| rs2295354  | RMVar_ID_719358  | m6A | 20 | 34768738 | NCOA6       | intron | m6A-Label-seq:(High)  | Functional Loss | T | C | 0.6140 | -0.0196 | 0.0019 | 2.10E-20 | eBMD |
| rs2295354  | RMVar_ID_857291  | m6A | 20 | 34768738 | NCOA6       | intron | m6A-Label-seq:(High)  | Functional Loss | T | C | 0.6140 | -0.0196 | 0.0019 | 2.10E-20 | eBMD |
| rs8501     | RMVar_ID_108080  | m1A | 20 | 35002781 | TRPC4AP     | 3_UTR  | m1A-quant-seq:(High)  | Functional Loss | T | C | 0.8223 | -0.0253 | 0.0024 | 2.70E-22 | eBMD |
| rs8501     | RMVar_ID_116498  | m1A | 20 | 35002781 | TRPC4AP     | 3_UTR  | m1A-quant-seq:(High)  | Functional Loss | T | C | 0.8223 | -0.0253 | 0.0024 | 2.70E-22 | eBMD |
| rs8501     | RMVar_ID_108079  | m1A | 20 | 35002781 | TRPC4AP     | 3_UTR  | m1A-quant-seq:(High)  | Functional Loss | T | C | 0.8223 | -0.0253 | 0.0024 | 2.70E-22 | eBMD |
| rs6072351  | RMVar_ID_273226  | m6A | 20 | 41359500 | LPIN3       | 3_UTR  | MeRIP-seq:(Medium)    | Functional Loss | G | C | 0.7757 | 0.0201  | 0.0022 | 2.90E-16 | eBMD |
| rs995533   | RMVar_ID_1216584 | m6A | 21 | 27367625 | EIF4A1P1    | exon   | Prediction:(Low)      | Functional Gain | C | G | 0.3786 | -0.0137 | 0.0019 | 4.20E-11 | eBMD |
| rs11556025 | RMVar_ID_89917   | m1A | 22 | 28772767 | CCDC117     | 5_UTR  | MeRIP-seq:(Medium)    | Functional Loss | T | C | 0.7038 | 0.0181  | 0.0020 | 2.10E-15 | eBMD |
| rs11556025 | RMVar_ID_89916   | m1A | 22 | 28772767 | CCDC117     | 5_UTR  | MeRIP-seq:(Medium)    | Functional Loss | T | C | 0.7038 | 0.0181  | 0.0020 | 2.10E-15 | eBMD |
| rs11556025 | RMVar_ID_112105  | m1A | 22 | 28772767 | CCDC117     | 5_UTR  | MeRIP-seq:(Medium)    | Functional Loss | T | C | 0.7038 | 0.0181  | 0.0020 | 2.10E-15 | eBMD |
| rs6005881  | RMVar_ID_516495  | m6A | 22 | 28787145 | CCDC117     | 3_UTR  | DART-seq:(High)       | Functional Loss | A | G | 0.7017 | 0.0179  | 0.0020 | 1.80E-15 | eBMD |
| rs6005881  | RMVar_ID_776539  | m6A | 22 | 28787145 | CCDC117     | 3_UTR  | DART-seq:(High)       | Functional Loss | A | G | 0.7017 | 0.0179  | 0.0020 | 1.80E-15 | eBMD |
| rs2072797  | RMVar_ID_1608854 | m7G | 22 | 38738202 | SUN2        | CDS    | MeRIP-seq:(Medium)    | Functional Loss | C | T | 0.8859 | 0.0280  | 0.0029 | 1.10E-15 | eBMD |
| rs2072797  | RMVar_ID_1577515 | m7G | 22 | 38738202 | SUN2        | CDS    | MeRIP-seq:(Medium)    | Functional Loss | C | T | 0.8859 | 0.0280  | 0.0029 | 1.10E-15 | eBMD |
| rs2072797  | RMVar_ID_1602810 | m7G | 22 | 38738202 | SUN2        | CDS    | MeRIP-seq:(Medium)    | Functional Loss | C | T | 0.8859 | 0.0280  | 0.0029 | 1.10E-15 | eBMD |
| rs6007010  | RMVar_ID_1228193 | m6A | 22 | 45387026 | SMC1B       | CDS    | Prediction:(Low)      | Functional Gain | T | C | 0.6534 | 0.0121  | 0.0020 | 1.90E-11 | eBMD |
| rs2142661  | RMVar_ID_1228227 | m6A | 22 | 45426000 | RIBC2       | CDS    | Prediction:(Low)      | Functional Gain | C | T | 0.8369 | 0.0160  | 0.0025 | 7.20E-10 | eBMD |
| rs1535189  | RMVar_ID_185028  | m6A | 22 | 49855483 | ZBED4       | intron | m6A-Label-seq:(High)  | Functional Loss | T | C | 0.1277 | -0.0209 | 0.0028 | 4.20E-14 | eBMD |
| rs910797   | RMVar_ID_59290   | m1A | 22 | 49884235 | ZBED4       | CDS    | m1A-quant-seq:(High)  | Functional Loss | A | G | 0.1043 | -0.0229 | 0.0030 | 1.80E-13 | eBMD |
| rs910797   | RMVar_ID_112255  | m1A | 22 | 49884235 | ZBED4       | CDS    | m1A-quant-seq:(High)  | Functional Loss | A | G | 0.1043 | -0.0229 | 0.0030 | 1.80E-13 | eBMD |



|            |                  |        |    |          |        |        |                    |                 |   |   |        |         |        |          |      |
|------------|------------------|--------|----|----------|--------|--------|--------------------|-----------------|---|---|--------|---------|--------|----------|------|
| rs11545763 | RMVar_ID_52958   | A-to-I | 22 | 49925522 | CRELD2 | CDS    | RNA-Seq:(High)     | Functional Loss | A | G | 0.8930 | 0.0219  | 0.0030 | 7.50E-13 | eBMD |
| rs11545763 | RMVar_ID_5550    | A-to-I | 22 | 49925522 | CRELD2 | CDS    | RNA-Seq:(High)     | Functional Loss | A | G | 0.8930 | 0.0219  | 0.0030 | 7.50E-13 | eBMD |
| rs28379706 | RMVar_ID_777655  | m6A    | 22 | 50289635 | PLXNB2 | CDS    | miCLIP:(High)      | Functional Loss | T | C | 0.6052 | 0.0136  | 0.0019 | 2.80E-11 | eBMD |
| rs28379706 | RMVar_ID_185842  | m6A    | 22 | 50289635 | PLXNB2 | CDS    | miCLIP:(High)      | Functional Loss | T | C | 0.6052 | 0.0136  | 0.0019 | 2.80E-11 | eBMD |
| rs28455041 | RMVar_ID_59387   | m1A    | 22 | 50293474 | PLXNB2 | intron | MeRIP-seq:(Medium) | Functional Loss | T | C | 0.6857 | 0.0135  | 0.0020 | 9.60E-11 | eBMD |
| rs1997715  | RMVar_ID_1479876 | m6A    | X  | 57596176 | ZXDB   | 3_UTR  | Prediction:(Low)   | Functional Loss | G | A | 0.7767 | -0.0225 | 0.0023 | 1.57E-23 | eBMD |

Supplementary Table S2 RNAm\_SNPs affected expression of key OP susceptibility genes

| SNP         | CHR                    | Position | eqtl                  | Local gene | If cis effect | Affected key OP genes |                               |        |
|-------------|------------------------|----------|-----------------------|------------|---------------|-----------------------|-------------------------------|--------|
|             |                        |          |                       |            |               | OP gene               | P value                       | Tissue |
| rs2229503   | 2                      | 54631527 | GTEx2015_v6 SPTBN1    | 1          | SPTBN1        | 1.80E-07              | Artery_Aorta                  |        |
|             |                        |          |                       |            |               | 6.30E-09              | Artery_Tibial                 |        |
|             |                        |          |                       |            |               | 4.90E-06              | Esophagus_Mucosa              |        |
|             |                        |          |                       |            |               | 1.42E-07              | Esophagus_Muscularis          |        |
|             |                        |          |                       |            |               | 3.10E-05              | Whole_Blood                   |        |
| rs75072999  | 4                      | 850993   | GTEx2015_v6 GAK       | 1          | FGFRL1        | 7.97E-08              | Thyroid                       |        |
| rs6815946   | 4                      | 1001517  | GTEx2015_v6 IDUA      | 0          | FGFRL1        | 9.76E-12              | Lymphoblastoid                |        |
| rs115790973 | 4                      | 1002772  | GTEx2015_v6 IDUA      | 0          | FGFRL1        | 6.50E-11              | Lymphoblastoid                |        |
| rs3796619   | 4                      | 1101493  | GTEx2015_v6 RNF212    | 1          | FGFRL1        | 3.28E-07              | Cells_Transformed_fibroblasts |        |
| rs643892    | 11                     | 68380985 | GTEx2015_v6 LRP5      | 1          | LRP5          | 1.04E-06              | Skin_Sun_Exposed_Lower_leg    |        |
| rs1983490   | 17                     | 43705589 | GTEx2015_v6 LINC02594 | 0          | SOST          | 3.15E-06              | Artery_Tibial                 |        |
|             |                        |          |                       |            |               | 5.96E-06              | Brain_Cortex                  |        |
|             |                        |          |                       |            |               | 4.03E-06              | Brain_Frontal_Cortex_BA9      |        |
| rs227584    | 17                     | 44148179 | GTEx2015_v6 HROB      | 0          | HDAC5         | 9.21E-07              | Esophagus_Mucosa              |        |
| rs8079310   | 17                     | 44192923 | GTEx2015_v6 ATXN7L3   | 0          | HDAC5         | 7.05E-07              | Esophagus_Mucosa              |        |
| rs76324150  | 17                     | 45895867 | GTEx2015_v6 MAPT      | 1          | WNT3          | 2.33E-07              | Adrenal_Gland                 |        |
|             |                        |          |                       |            |               | 5.41E-09              | Artery_Aorta                  |        |
|             |                        |          |                       |            |               | 6.15E-06              | Artery_Coronary               |        |
|             |                        |          |                       |            |               | 6.84E-06              | Artery_Tibial                 |        |
|             |                        |          |                       |            |               | 1.83E-06              | Esophagus_Muscularis          |        |
|             |                        |          |                       |            |               | 1.52E-06              | Heart_Atrial_Appendage        |        |
|             |                        |          |                       |            |               | 6.60E-07              | Lung                          |        |
|             |                        |          |                       |            |               | 8.36E-07              | Nerve_Tibial                  |        |
|             |                        |          |                       |            |               | 5.17E-10              | Pancreas                      |        |
|             |                        |          |                       |            |               | 1.74E-05              | Testis                        |        |
| rs4792891   | 17                     | 45896132 | GTEx2015_v6 MAPT      | 1          | WNT3          | 2.35E-15              | Thyroid                       |        |
|             |                        |          |                       |            |               | 1.58E-06              | Artery_Aorta                  |        |
|             |                        |          |                       |            |               | 4.59E-06              | Heart_Atrial_Appendage        |        |
|             |                        |          |                       |            |               | 6.48E-06              | Pancreas                      |        |
| rs17650901  | 17                     | 45962325 | GTEx2015_v6 MAPT      | 1          | WNT3          | 1.37E-10              | Thyroid                       |        |
|             |                        |          |                       |            |               | 2.33E-07              | Adrenal_Gland                 |        |
|             |                        |          |                       |            |               | 5.41E-09              | Artery_Aorta                  |        |
|             |                        |          |                       |            |               | 6.15E-06              | Artery_Coronary               |        |
|             |                        |          |                       |            |               | 6.84E-06              | Artery_Tibial                 |        |
|             |                        |          |                       |            |               | 1.83E-06              | Esophagus_Muscularis          |        |
|             |                        |          |                       |            |               | 1.52E-06              | Heart_Atrial_Appendage        |        |
|             |                        |          |                       |            |               | 6.60E-07              | Lung                          |        |
|             |                        |          |                       |            |               | 8.36E-07              | Nerve_Tibial                  |        |
|             |                        |          |                       |            |               | 5.17E-10              | Pancreas                      |        |
| rs7350928   | 17                     | 46030734 | GTEx2015_v6 KANSL1    | 1          | WNT3          | 1.74E-05              | Testis                        |        |
|             |                        |          |                       |            |               | 2.35E-15              | Thyroid                       |        |
|             |                        |          |                       |            |               | 2.33E-07              | Adrenal_Gland                 |        |
|             |                        |          |                       |            |               | 5.42E-09              | Artery_Aorta                  |        |
|             |                        |          |                       |            |               | 6.15E-06              | Artery_Coronary               |        |
|             |                        |          |                       |            |               | 6.84E-06              | Artery_Tibial                 |        |
|             |                        |          |                       |            |               | 1.83E-06              | Esophagus_Muscularis          |        |
| 1.52E-06    | Heart_Atrial_Appendage |          |                       |            |               |                       |                               |        |
| 6.60E-07    | Lung                   |          |                       |            |               |                       |                               |        |

|            |    |          |                    |   |           |          |                            |
|------------|----|----------|--------------------|---|-----------|----------|----------------------------|
| rs17574425 | 17 | 46031822 | GTEx2015_v6 KANSL1 | 1 | WNT3      | 8.36E-07 | Nerve_Tibial               |
|            |    |          |                    |   |           | 5.16E-10 | Pancreas                   |
|            |    |          |                    |   |           | 1.74E-05 | Testis                     |
|            |    |          |                    |   |           | 2.34E-15 | Thyroid                    |
|            |    |          |                    |   |           | 2.33E-07 | Adrenal_Gland              |
|            |    |          |                    |   |           | 5.41E-09 | Artery_Aorta               |
|            |    |          |                    |   |           | 6.15E-06 | Artery_Coronary            |
|            |    |          |                    |   |           | 6.84E-06 | Artery_Tibial              |
|            |    |          |                    |   |           | 1.83E-06 | Esophagus_Muscularis       |
|            |    |          |                    |   |           | 1.52E-06 | Heart_Atrial_Appendage     |
|            |    |          |                    |   |           | 6.60E-07 | Lung                       |
|            |    |          |                    |   |           | 8.36E-07 | Nerve_Tibial               |
|            |    |          |                    |   |           | 5.17E-10 | Pancreas                   |
|            |    |          |                    |   |           | 1.74E-05 | Testis                     |
|            |    |          |                    |   |           | 2.35E-15 | Thyroid                    |
| rs978572   | 18 | 62254957 | GTEx2015_v6 RELCH  | 0 | TNFRSF11A | 5.44E-09 | Esophagus_Mucosa           |
|            |    |          |                    |   |           | 8.75E-06 | Pancreas                   |
|            |    |          |                    |   |           | 6.17E-12 | Skin_Sun_Exposed_Lower_leg |

---

Supplementary Table S3 Gene expression associated with BMD in SMR analysis

| Gene    | probeID            | ProbeChr | Probe_bp  | b_SMR   | se_SMR | p_SMR    | p_HEIDI  | Tissue                   |
|---------|--------------------|----------|-----------|---------|--------|----------|----------|--------------------------|
| MTOR    | ILMN_1769031       | 1        | 11166911  | -0.0884 | 0.0169 | 1.62E-07 | 4.33E-02 | Whole blood CAGE         |
| MTOR    | ENSG00000198793.8  | 1        | 11244578  | -0.0685 | 0.0114 | 1.96E-09 | 2.57E-02 | Whole Blood GTEx         |
| CDC42   | ILMN_1675156       | 1        | 22379209  | -0.0389 | 0.0030 | 1.48E-37 | 7.42E-25 | Whole blood westra       |
| SCMH1   | ILMN_1714738       | 1        | 41651847  | 0.1411  | 0.0305 | 3.79E-06 | 2.36E-01 | Whole blood westra       |
| ST7L    | ILMN_1659926       | 1        | 113084506 | 0.0765  | 0.0122 | 3.26E-10 | 2.89E-08 | Whole blood westra       |
| ST7L    | ILMN_1659926       | 1        | 113084507 | 0.0480  | 0.0073 | 6.36E-11 | 4.05E-09 | Whole blood CAGE         |
| ST7L    | ILMN_2410113       | 1        | 113098585 | 0.1021  | 0.0187 | 4.80E-08 | 1.58E-05 | Whole blood westra       |
| ST7L    | ILMN_2410113       | 1        | 113098586 | 0.0603  | 0.0103 | 4.08E-09 | 5.63E-11 | Whole blood CAGE         |
| ST7L    | ENSG00000007341.14 | 1        | 113122614 | 0.0231  | 0.0035 | 6.35E-11 | 1.37E-07 | Adipose Visceral Omentum |
| ST7L    | ENSG00000007341.14 | 1        | 113122614 | 0.0219  | 0.0032 | 4.73E-12 | 1.09E-15 | Adipose Subcutaneous     |
| ST7L    | ENSG00000007341.14 | 1        | 113122614 | 0.0408  | 0.0069 | 3.17E-09 | 1.65E-11 | Muscle Skeletal          |
| ST7L    | ENSG00000007341.14 | 1        | 113122614 | 0.0462  | 0.0091 | 4.47E-07 | 1.89E-01 | Whole Blood GTEx         |
| PSEN2   | ILMN_1714417       | 1        | 227083641 | 0.0684  | 0.0147 | 3.11E-06 | 5.92E-02 | Whole blood westra       |
| JMJD4   | ILMN_1692896       | 1        | 227919163 | -0.0249 | 0.0053 | 2.76E-06 | 8.64E-09 | Whole blood westra       |
| TRMT61B | ILMN_1706558       | 2        | 29073207  | 0.0677  | 0.0119 | 1.43E-08 | 1.69E-03 | Whole blood CAGE         |
| TRMT61B | ENSG00000171103.6  | 2        | 29082927  | 0.0291  | 0.0044 | 5.71E-11 | 2.84E-05 | Adipose Visceral Omentum |
| TRMT61B | ENSG00000171103.6  | 2        | 29082927  | 0.0444  | 0.0068 | 6.31E-11 | 2.93E-06 | Muscle Skeletal          |
| TRMT61B | ENSG00000171103.6  | 2        | 29082927  | 0.0245  | 0.0037 | 2.69E-11 | 3.97E-05 | Adipose Subcutaneous     |
| SPTBN1  | ENSG00000115306.11 | 2        | 54790117  | -0.0960 | 0.0118 | 3.15E-16 | 8.74E-04 | Whole Blood GTEx         |
| SPTBN1  | ENSG00000115306.11 | 2        | 54790117  | 0.1699  | 0.0275 | 6.55E-10 | 2.22E-02 | Adipose Subcutaneous     |
| SPTBN1  | ILMN_1690708       | 2        | 54885095  | -0.2898 | 0.0507 | 1.08E-08 | 5.76E-05 | Whole blood westra       |
| SPTBN1  | ILMN_1661335       | 2        | 54893166  | -0.1694 | 0.0157 | 4.31E-27 | 3.28E-04 | Whole blood westra       |
| SPTBN1  | ILMN_1661335       | 2        | 54893167  | -0.1344 | 0.0130 | 3.13E-25 | 1.65E-03 | Whole blood CAGE         |
| CLHC1   | ENSG00000162994.11 | 2        | 55430708  | -0.0114 | 0.0021 | 1.12E-07 | 7.06E-03 | Adipose Subcutaneous     |
| CLHC1   | ENSG00000162994.11 | 2        | 55430708  | -0.0137 | 0.0026 | 1.41E-07 | 9.57E-04 | Adipose Visceral Omentum |
| RFT1    | ENSG00000163933.5  | 3        | 53143488  | -0.0244 | 0.0045 | 7.59E-08 | 2.82E-02 | Adipose Subcutaneous     |
| RFT1    | ENSG00000163933.5  | 3        | 53143488  | -0.0222 | 0.0040 | 2.66E-08 | 6.61E-02 | Adipose Visceral Omentum |
| RFT1    | ENSG00000163933.5  | 3        | 53143488  | -0.0296 | 0.0054 | 4.30E-08 | 1.28E-03 | Muscle Skeletal          |
| ZXDC    | ILMN_1743643       | 3        | 126156609 | 0.0275  | 0.0050 | 5.14E-08 | 1.20E-02 | Whole blood westra       |
| ZXDC    | ILMN_1743643       | 3        | 126156610 | 0.0278  | 0.0053 | 1.49E-07 | 6.16E-02 | Whole blood CAGE         |
| ZXDC    | ENSG00000070476.10 | 3        | 126175603 | 0.0278  | 0.0058 | 1.59E-06 | 2.55E-01 | Adipose Subcutaneous     |
| ZXDC    | ENSG00000070476.10 | 3        | 126175603 | 0.0245  | 0.0050 | 1.04E-06 | 1.41E-01 | Adipose Visceral Omentum |
| IDUA    | ENSG00000127415.8  | 4        | 989550    | 0.1045  | 0.0224 | 3.11E-06 | 7.27E-01 | Muscle Skeletal          |
| FGFRL1  | ENSG00000127418.10 | 4        | 1012204   | -0.2370 | 0.0420 | 1.61E-08 | NA       | Muscle Skeletal          |
| RNF212  | ILMN_1787259       | 4        | 1065622   | 0.1483  | 0.0296 | 5.57E-07 | 8.75E-08 | Whole blood CAGE         |
| RNF212  | ENSG00000178222.8  | 4        | 1078696   | 0.0495  | 0.0104 | 1.78E-06 | 2.49E-01 | Adipose Subcutaneous     |
| RNF212  | ENSG00000178222.8  | 4        | 1078696   | 0.0549  | 0.0106 | 2.40E-07 | 2.44E-01 | Muscle Skeletal          |
| UVSSA   | ENSG00000163945.11 | 4        | 1361445   | 0.0282  | 0.0046 | 5.90E-10 | 9.33E-06 | Liver                    |
| PJA2    | ENSG00000198961.5  | 5        | 108708052 | -0.0996 | 0.0208 | 1.58E-06 | 8.06E-01 | Adipose Subcutaneous     |
| PJA2    | ENSG00000198961.5  | 5        | 108708052 | -0.1740 | 0.0343 | 3.76E-07 | 6.27E-01 | Whole Blood GTEx         |
| BTN3A2  | ILMN_1700067       | 6        | 26368278  | -0.0118 | 0.0019 | 6.36E-10 | 2.32E-04 | Whole blood CAGE         |
| BTN3A2  | ENSG00000186470.9  | 6        | 26371966  | -0.0144 | 0.0024 | 3.45E-09 | 1.40E-03 | Adipose Subcutaneous     |
| BTN3A2  | ENSG00000186470.9  | 6        | 26371966  | -0.0120 | 0.0023 | 2.18E-07 | 5.06E-03 | Ovary                    |
| BTN3A2  | ENSG00000186470.9  | 6        | 26371966  | -0.0130 | 0.0024 | 1.02E-07 | 8.13E-01 | Liver                    |
| BTN3A2  | ENSG00000186470.9  | 6        | 26371966  | -0.0155 | 0.0026 | 2.78E-09 | 9.14E-03 | Whole Blood GTEx         |
| BTN3A2  | ENSG00000186470.9  | 6        | 26371966  | -0.0137 | 0.0023 | 2.15E-09 | 2.43E-02 | Muscle Skeletal          |
| BTN3A2  | ENSG00000186470.9  | 6        | 26371966  | -0.0164 | 0.0028 | 2.78E-09 | 5.01E-04 | Adipose Visceral Omentum |
| BTN3A2  | ILMN_1676528       | 6        | 26378138  | -0.0123 | 0.0020 | 6.68E-10 | 6.96E-05 | Whole blood CAGE         |
| ZKSCAN4 | ILMN_1804571       | 6        | 28212601  | 0.0395  | 0.0081 | 9.44E-07 | 5.76E-03 | Whole blood CAGE         |

|          |                    |    |           |         |        |          |          |                          |
|----------|--------------------|----|-----------|---------|--------|----------|----------|--------------------------|
| HLA-A    | ENSG00000206503.7  | 6  | 29911349  | -0.0420 | 0.0075 | 1.89E-08 | 1.80E-01 | Whole Blood GTEx         |
| HLA-A    | ENSG00000206503.7  | 6  | 29911349  | 0.0226  | 0.0047 | 1.43E-06 | 1.44E-07 | Ovary                    |
| HLA-A    | ENSG00000206503.7  | 6  | 29911349  | -0.0483 | 0.0078 | 6.89E-10 | 2.61E-02 | Liver                    |
| EPDR1    | ENSG00000086289.7  | 7  | 37975853  | 0.2048  | 0.0412 | 6.53E-07 | 5.19E-09 | Muscle Skeletal          |
| EPDR1    | ENSG00000086289.7  | 7  | 37975853  | 0.1279  | 0.0238 | 8.06E-08 | NA       | Adipose Visceral Omentum |
| EPDR1    | ENSG00000086289.7  | 7  | 37975853  | 0.1070  | 0.0167 | 1.66E-10 | 6.85E-08 | Adipose Subcutaneous     |
| PILRA    | ENSG00000085514.11 | 7  | 99984393  | -0.0121 | 0.0020 | 9.98E-10 | 9.21E-02 | Muscle Skeletal          |
| PILRA    | ENSG00000085514.11 | 7  | 99984393  | -0.0177 | 0.0030 | 3.91E-09 | 1.48E-02 | Adipose Subcutaneous     |
| PILRA    | ENSG00000085514.11 | 7  | 99984393  | -0.0110 | 0.0020 | 2.41E-08 | 1.11E-01 | Liver                    |
| PILRA    | ENSG00000085514.11 | 7  | 99984393  | -0.0213 | 0.0038 | 1.52E-08 | 4.62E-02 | Adipose Visceral Omentum |
| PILRA    | ENSG00000085514.11 | 7  | 99984393  | -0.0134 | 0.0025 | 9.67E-08 | 1.21E-01 | Ovary                    |
| SLC4A2   | ILMN_2078389       | 7  | 150772841 | -0.1028 | 0.0223 | 3.91E-06 | 6.71E-01 | Whole blood CAGE         |
| ABCF2    | ILMN_1781999       | 7  | 150911205 | 0.0578  | 0.0119 | 1.29E-06 | 4.40E-05 | Whole blood CAGE         |
| ABCF2    | ENSG00000033050.3  | 7  | 150914619 | 0.0659  | 0.0135 | 1.14E-06 | 1.25E-01 | Whole Blood GTEx         |
| FAM86B3P | ENSG00000173295.3  | 8  | 8094252   | 0.0523  | 0.0051 | 9.17E-25 | 2.38E-02 | Adipose Visceral Omentum |
| FAM86B3P | ENSG00000173295.3  | 8  | 8094252   | 0.0996  | 0.0165 | 1.61E-09 | 2.21E-01 | Adipose Subcutaneous     |
| ERI1     | ENSG00000104626.10 | 8  | 8916956   | -0.0740 | 0.0119 | 5.21E-10 | 3.05E-05 | Whole Blood GTEx         |
| PPP1R3B  | ILMN_1712236       | 8  | 8996073   | 0.1563  | 0.0206 | 2.92E-14 | 1.77E-04 | Whole blood westra       |
| PPP1R3B  | ILMN_1712236       | 8  | 8996074   | 0.1616  | 0.0301 | 8.24E-08 | 3.19E-02 | Whole blood CAGE         |
| MSRA     | ILMN_2228180       | 8  | 10286184  | -0.0909 | 0.0066 | 8.78E-44 | 1.23E-04 | Whole blood westra       |
| MSRA     | ILMN_2228180       | 8  | 10286185  | -0.0796 | 0.0066 | 5.68E-34 | 1.21E-04 | Whole blood CAGE         |
| RPIL1    | ENSG00000183638.5  | 8  | 10516778  | 0.0446  | 0.0087 | 3.13E-07 | 1.05E-04 | Adipose Subcutaneous     |
| XKR6     | ILMN_1724762       | 8  | 11058127  | -0.2024 | 0.0293 | 4.88E-12 | 2.38E-03 | Whole blood westra       |
| XKR6     | ILMN_1724762       | 8  | 11058128  | -0.1956 | 0.0365 | 8.46E-08 | 1.00E-01 | Whole blood CAGE         |
| MTMR9    | ENSG00000104643.5  | 8  | 11163785  | 0.1232  | 0.0176 | 2.47E-12 | 4.65E-05 | Muscle Skeletal          |
| MTMR9    | ILMN_1652521       | 8  | 11185454  | 0.2427  | 0.0411 | 3.54E-09 | 6.45E-03 | Whole blood westra       |
| MTMR9    | ILMN_1652521       | 8  | 11185455  | 0.1650  | 0.0256 | 1.23E-10 | 1.60E-01 | Whole blood CAGE         |
| FDFT1    | ENSG00000079459.8  | 8  | 11674950  | 0.0608  | 0.0121 | 5.25E-07 | 2.09E-02 | Adipose Visceral Omentum |
| FDFT1    | ENSG00000079459.8  | 8  | 11674950  | 0.0934  | 0.0160 | 5.25E-09 | 1.07E-01 | Adipose Subcutaneous     |
| FDFT1    | ENSG00000079459.8  | 8  | 11674950  | -0.0717 | 0.0143 | 5.54E-07 | 5.35E-05 | Muscle Skeletal          |
| FDFT1    | ILMN_1741096       | 8  | 11696256  | 0.0397  | 0.0044 | 2.36E-19 | 4.62E-08 | Whole blood westra       |
| FDFT1    | ILMN_1741096       | 8  | 11696257  | 0.0357  | 0.0034 | 3.63E-25 | 1.72E-03 | Whole blood CAGE         |
| FDFT1    | ILMN_2144088       | 8  | 11696385  | 0.0255  | 0.0027 | 9.36E-21 | 1.51E-07 | Whole blood westra       |
| FDFT1    | ILMN_2144088       | 8  | 11696386  | 0.0243  | 0.0026 | 4.05E-21 | 8.88E-08 | Whole blood CAGE         |
| CTSB     | ILMN_2359742       | 8  | 11700489  | -0.0223 | 0.0034 | 3.22E-11 | 0.00E+00 | Whole blood westra       |
| CTSB     | ILMN_2359742       | 8  | 11700490  | -0.0240 | 0.0034 | 1.81E-12 | 2.23E-42 | Whole blood CAGE         |
| CTSB     | ILMN_1696360       | 8  | 11700938  | 0.0375  | 0.0036 | 2.50E-25 | 6.72E-41 | Whole blood CAGE         |
| CTSB     | ENSG00000164733.16 | 8  | 11713495  | -0.1378 | 0.0226 | 1.15E-09 | 4.40E-01 | Adipose Subcutaneous     |
| CTSB     | ENSG00000164733.16 | 8  | 11713495  | -0.1768 | 0.0351 | 4.63E-07 | 4.28E-01 | Adipose Visceral Omentum |
| CDK9     | ILMN_1747556       | 9  | 130552088 | 0.0656  | 0.0109 | 1.77E-09 | 1.28E-02 | Whole blood westra       |
| KLF6     | ILMN_1700727       | 10 | 3818466   | 0.0654  | 0.0088 | 9.02E-14 | 1.91E-07 | Whole blood westra       |
| KLF6     | ILMN_1700727       | 10 | 3818467   | 0.0614  | 0.0093 | 3.98E-11 | 6.22E-07 | Whole blood CAGE         |
| BTBD16   | ENSG00000138152.7  | 10 | 124064249 | -0.0225 | 0.0035 | 2.25E-10 | 9.20E-02 | Adipose Visceral Omentum |
| BTBD16   | ENSG00000138152.7  | 10 | 124064249 | -0.0210 | 0.0043 | 1.12E-06 | 1.95E-01 | Ovary                    |
| BTBD16   | ENSG00000138152.7  | 10 | 124064249 | -0.0320 | 0.0052 | 5.19E-10 | 3.33E-01 | Muscle Skeletal          |
| BTBD16   | ENSG00000138152.7  | 10 | 124064249 | -0.0186 | 0.0026 | 9.61E-13 | 3.81E-02 | Adipose Subcutaneous     |
| NRIP3    | ILMN_1759563       | 11 | 9004438   | 0.0707  | 0.0140 | 3.98E-07 | 5.35E-10 | Whole blood westra       |
| GAL      | ENSG00000069482.6  | 11 | 68454945  | -0.0297 | 0.0051 | 6.35E-09 | 2.17E-01 | Whole Blood GTEx         |
| GAL      | ILMN_1682015       | 11 | 68457385  | -0.1008 | 0.0181 | 2.49E-08 | 1.41E-01 | Whole blood westra       |
| MPHOSPH9 | ILMN_1654421       | 12 | 123645687 | -0.0645 | 0.0111 | 5.74E-09 | 3.00E-01 | Whole blood CAGE         |
| C12orf65 | ENSG00000130921.3  | 12 | 123729984 | 0.0680  | 0.0135 | 4.54E-07 | 7.01E-01 | Adipose Visceral Omentum |

|         |                    |    |           |         |        |          |          |                          |
|---------|--------------------|----|-----------|---------|--------|----------|----------|--------------------------|
| SBNO1   | ILMN_1739943       | 12 | 123782563 | 0.0894  | 0.0180 | 6.84E-07 | 6.27E-01 | Whole blood CAGE         |
| DOCK9   | ENSG00000088387.13 | 13 | 99592310  | 0.0850  | 0.0145 | 4.84E-09 | 3.49E-01 | Whole Blood GTEx         |
| DOCK9   | ENSG00000088387.13 | 13 | 99592310  | -0.0950 | 0.0192 | 7.24E-07 | 9.66E-01 | Muscle Skeletal          |
| SRP54   | ILMN_1753862       | 14 | 35497375  | -0.0376 | 0.0058 | 7.90E-11 | 4.49E-13 | Whole blood CAGE         |
| SRP54   | ILMN_2312275       | 14 | 35498322  | -0.0353 | 0.0054 | 4.64E-11 | 5.32E-15 | Whole blood CAGE         |
| XRCC3   | ENSG00000126215.9  | 14 | 104172893 | 0.0493  | 0.0086 | 9.27E-09 | 9.04E-05 | Whole Blood GTEx         |
| XRCC3   | ENSG00000126215.9  | 14 | 104172893 | 0.0651  | 0.0121 | 8.33E-08 | 2.00E-01 | Muscle Skeletal          |
| XRCC3   | ENSG00000126215.9  | 14 | 104172893 | 0.0556  | 0.0103 | 6.07E-08 | 7.50E-02 | Adipose Subcutaneous     |
| CYP19A1 | ENSG00000137869.9  | 15 | 51565530  | 0.1436  | 0.0235 | 9.75E-10 | 2.41E-01 | Whole Blood GTEx         |
| PKD1    | ILMN_2339028       | 16 | 2139150   | -0.0789 | 0.0137 | 8.84E-09 | 9.92E-01 | Whole blood CAGE         |
| PKD1    | ENSG0000008710.13  | 16 | 2162308   | -0.0989 | 0.0211 | 2.84E-06 | 4.45E-02 | Adipose Subcutaneous     |
| TNRC6A  | ILMN_1714622       | 16 | 24835531  | 0.0321  | 0.0059 | 4.88E-08 | 3.68E-01 | Whole blood CAGE         |
| G6PC3   | ENSG00000141349.4  | 17 | 42150906  | 0.1259  | 0.0211 | 2.35E-09 | 2.13E-08 | Whole Blood GTEx         |
| G6PC3   | ENSG00000141349.4  | 17 | 42150906  | 0.1133  | 0.0173 | 6.09E-11 | 1.42E-08 | Muscle Skeletal          |
| G6PC3   | ILMN_2127477       | 17 | 42153390  | 0.2335  | 0.0400 | 5.24E-09 | 1.35E-01 | Whole blood westra       |
| G6PC3   | ILMN_2127477       | 17 | 42153391  | 0.1207  | 0.0213 | 1.40E-08 | 5.29E-02 | Whole blood CAGE         |
| NMT1    | ENSG00000136448.7  | 17 | 43157682  | 0.0952  | 0.0166 | 9.33E-09 | 1.33E-01 | Adipose Visceral Omentum |
| NMT1    | ENSG00000136448.7  | 17 | 43157682  | 0.0673  | 0.0109 | 6.77E-10 | 1.06E-03 | Adipose Subcutaneous     |
| NMT1    | ILMN_1762678       | 17 | 43186237  | 0.0987  | 0.0178 | 3.02E-08 | 5.39E-03 | Whole blood westra       |
| NMT1    | ILMN_1762678       | 17 | 43186238  | 0.0688  | 0.0121 | 1.45E-08 | 3.05E-03 | Whole blood CAGE         |
| PLEKHM1 | ENSG00000225190.4  | 17 | 43540690  | -0.0701 | 0.0094 | 1.03E-13 | 5.73E-01 | Muscle Skeletal          |
| PLEKHM1 | ENSG00000225190.4  | 17 | 43540690  | -0.0822 | 0.0166 | 7.23E-07 | 4.12E-02 | Adipose Subcutaneous     |
| CRHR1   | ENSG00000120088.10 | 17 | 43806230  | -0.0448 | 0.0070 | 1.50E-10 | 9.75E-01 | Adipose Visceral Omentum |
| CRHR1   | ENSG00000120088.10 | 17 | 43806230  | -0.0493 | 0.0087 | 1.43E-08 | 1.00E+00 | Adipose Subcutaneous     |
| KANSL1  | ENSG00000120071.8  | 17 | 44205007  | -0.0545 | 0.0088 | 7.43E-10 | 1.82E-01 | Muscle Skeletal          |
| KANSL1  | ENSG00000120071.8  | 17 | 44205007  | -0.0436 | 0.0089 | 9.39E-07 | 7.15E-07 | Whole Blood GTEx         |
| DDX5    | ILMN_1805344       | 17 | 62496088  | 0.0318  | 0.0039 | 2.53E-16 | 3.19E-01 | Whole blood westra       |
| DDX5    | ILMN_1805344       | 17 | 62496089  | 0.0309  | 0.0039 | 4.66E-15 | NA       | Whole blood CAGE         |
| DDX5    | ENSG00000108654.7  | 17 | 62500025  | 0.0553  | 0.0092 | 2.07E-09 | NA       | Adipose Subcutaneous     |
| DDX5    | ENSG00000108654.7  | 17 | 62500025  | 0.0569  | 0.0091 | 4.51E-10 | NA       | Whole Blood GTEx         |
| ASPSCR1 | ENSG00000169696.11 | 17 | 79954982  | 0.0498  | 0.0102 | 1.01E-06 | 8.63E-01 | Muscle Skeletal          |
| ASPSCR1 | ILMN_1660749       | 17 | 79975259  | -0.0303 | 0.0058 | 1.77E-07 | 6.90E-04 | Whole blood CAGE         |
| SSBP4   | ENSG00000130511.11 | 19 | 18537435  | -0.0547 | 0.0101 | 6.83E-08 | 4.56E-03 | Muscle Skeletal          |
| NCOA6   | ILMN_1695797       | 20 | 33302950  | 0.1026  | 0.0204 | 4.88E-07 | 2.10E-07 | Whole blood CAGE         |
| TRPC4AP | ILMN_2402805       | 20 | 33590403  | -0.0312 | 0.0031 | 4.24E-24 | 5.62E-21 | Whole blood westra       |
| TRPC4AP | ILMN_2402806       | 20 | 33590649  | 0.0523  | 0.0073 | 5.42E-13 | 1.59E-08 | Whole blood westra       |
| TRPC4AP | ILMN_2402806       | 20 | 33590650  | 0.0454  | 0.0052 | 4.27E-18 | 1.48E-07 | Whole blood CAGE         |
| ZBED4   | ILMN_1782129       | 22 | 50281654  | -0.0732 | 0.0143 | 3.31E-07 | 3.26E-02 | Whole blood westra       |
| ZBED4   | ILMN_1782129       | 22 | 50281655  | -0.0571 | 0.0114 | 5.57E-07 | 3.41E-02 | Whole blood CAGE         |
| CRELD2  | ILMN_1748707       | 22 | 50321003  | -0.0162 | 0.0032 | 5.95E-07 | 1.19E-05 | Whole blood westra       |
| CRELD2  | ILMN_1748707       | 22 | 50321004  | -0.0168 | 0.0034 | 9.28E-07 | 4.57E-06 | Whole blood CAGE         |



Supplementary Table S4 RNAm\_SNP's affected circulating protein levels

| SNP         | Chr | position  | Protein.coding.Gene | Protein                  | Allele1 | Allele2 | Effect  | StdErr  | P_pQTL    | Study            |            |
|-------------|-----|-----------|---------------------|--------------------------|---------|---------|---------|---------|-----------|------------------|------------|
| rs807936    | 3   | 47322496  | CCL4                | MIP1b                    | T       | C       | -0.0849 | 0.0161  | 1.27E-07  | Ahola-Olli et al |            |
| rs807931    | 3   | 47389317  | CCL4                | MIP1b                    | T       | C       | -0.0845 | 0.0161  | 1.42E-07  | Ahola-Olli et al |            |
| rs6442112   | 3   | 48316034  | MST1                | Hepatocyte growth factor | A       | G       | 0.3507  | 0.0458  | 4.66E-14  | Suhre et al.     |            |
| rs2645429   | 8   | 11660051  | CTSB                | Cathepsin B              | T       | G       | 0.9150  | 0.0200  | 1.00E-300 | Suhre et al.     |            |
| rs7513688   | 1   | 6652745   | PLXNC1              | PLXNC1.4564              | A       | G       | 0.1245  | 0.0257  | 1.23E-06  | Sun et al.       |            |
| rs2294532   | 1   | 6694927   | LRTM2               | LRTM2.8906               | T       | C       | -0.1077 | 0.0259  | 3.31E-05  | Sun et al.       |            |
| rs2294532   | 1   | 6694927   | MRC2                | MRC2.3041                | T       | C       | 0.1082  | 0.0259  | 3.02E-05  | Sun et al.       |            |
| rs2294532   | 1   | 6694927   | PLXNC1              | PLXNC1.4564              | T       | C       | 0.1121  | 0.0259  | 1.55E-05  | Sun et al.       |            |
| rs430600    | 1   | 89225976  | CCL1                | CCL1.13687               | T       | C       | 0.1070  | 0.0252  | 2.19E-05  | Sun et al.       |            |
| rs430600    | 1   | 89225976  | FGFR3               | FGFR3.13669              | T       | C       | 0.1042  | 0.0252  | 3.63E-05  | Sun et al.       |            |
| rs430600    | 1   | 89225976  | CCBL2               | CCBL2.12682              | T       | C       | -0.1185 | 0.0252  | 2.57E-06  | Sun et al.       |            |
| rs430600    | 1   | 89225976  | IGFL4               | IGFL4.6353               | T       | C       | 0.1075  | 0.0252  | 2.00E-05  | Sun et al.       |            |
| rs6673179   | 1   | 89416516  | CCBL2               | CCBL2.12682              | T       | C       | 0.1687  | 0.0246  | 6.46E-12  | Sun et al.       |            |
| rs910697    | 1   | 113063125 | ST6GALNAC3          | ST6GALNAC3               | A       | G       | 0.1026  | 0.0245  | 2.82E-05  | Sun et al.       |            |
| rs910697    | 1   | 113063125 | FLT3LG              | FLT3LG.1409              | A       | G       | 0.1040  | 0.0245  | 2.24E-05  | Sun et al.       |            |
| rs910697    | 1   | 113063125 | CBFB                | CBFB.10048               | T       | A       | G       | 0.1006  | 0.0245    | 4.07E-05         | Sun et al. |
| rs6682737   | 1   | 113136229 | FLT3LG              | FLT3LG.1409              | T       | C       | 0.1072  | 0.0241  | 8.91E-06  | Sun et al.       |            |
| rs6682737   | 1   | 113136229 | CRYAA               | CRYAA.1008               | T       | C       | -0.0992 | 0.0241  | 3.98E-05  | Sun et al.       |            |
| rs6682737   | 1   | 113136229 | ST6GALNAC3          | ST6GALNAC3               | T       | C       | 0.1067  | 0.0241  | 9.77E-06  | Sun et al.       |            |
| rs6682737   | 1   | 113136229 | CBFB                | CBFB.10048               | T       | C       | 0.1001  | 0.0241  | 3.39E-05  | Sun et al.       |            |
| rs2974935   | 1   | 155181843 | NPPB                | NPPB.7655                | T       | G       | -0.1120 | 0.0246  | 5.37E-06  | Sun et al.       |            |
| rs2974935   | 1   | 155181843 | TFF1                | TFF1.9185                | T       | G       | -0.1306 | 0.0246  | 1.10E-07  | Sun et al.       |            |
| rs1061160   | 1   | 220154768 | G6B                 | G6B.9466                 | T       | C       | -0.1080 | 0.0263  | 3.98E-05  | Sun et al.       |            |
| rs807936    | 3   | 47322496  | TDGF1               | TDGF1.5810               | T       | C       | -0.1869 | 0.0252  | 1.20E-13  | Sun et al.       |            |
| rs807931    | 3   | 47389317  | TDGF1               | TDGF1.5810               | T       | C       | -0.1856 | 0.0252  | 1.82E-13  | Sun et al.       |            |
| rs6442112   | 3   | 48316034  | TXNDC12             | TXNDC12.481              | A       | G       | -0.1962 | 0.0279  | 2.00E-12  | Sun et al.       |            |
| rs6442112   | 3   | 48316034  | PRDM1               | PRDM1.1419               | T       | A       | G       | 0.2175  | 0.0278    | 5.62E-15         | Sun et al. |
| rs6442112   | 3   | 48316034  | TNS2                | TNS2.11667               | T       | A       | G       | 0.1204  | 0.0280    | 1.74E-05         | Sun et al. |
| rs6442112   | 3   | 48316034  | DOCK9               | DOCK9.14002              | A       | G       | 0.1348  | 0.0280  | 1.48E-06  | Sun et al.       |            |
| rs6442112   | 3   | 48316034  | STOM                | STOM.8261                | T       | A       | G       | 0.1440  | 0.0280    | 2.69E-07         | Sun et al. |
| rs6442112   | 3   | 48316034  | TMPRSS11D           | TMPRSS11D                | T       | A       | G       | 0.2060  | 0.0279    | 1.48E-13         | Sun et al. |
| rs9860285   | 3   | 49355374  | ADH1B               | ADH1B.9834               | T       | G       | -0.1540 | 0.0278  | 2.95E-08  | Sun et al.       |            |
| rs9860285   | 3   | 49355374  | CCL19               | CCL19.4922               | T       | G       | -0.1165 | 0.0278  | 2.88E-05  | Sun et al.       |            |
| rs9860285   | 3   | 49355374  | TNS2                | TNS2.11667               | T       | G       | -0.1790 | 0.0277  | 1.07E-10  | Sun et al.       |            |
| rs9860285   | 3   | 49355374  | PRDM1               | PRDM1.1419               | T       | G       | -0.3005 | 0.0274  | 6.03E-28  | Sun et al.       |            |
| rs9860285   | 3   | 49355374  | TXNDC12             | TXNDC12.481              | T       | G       | 0.2736  | 0.0275  | 2.57E-23  | Sun et al.       |            |
| rs9860285   | 3   | 49355374  | STOM                | STOM.8261                | T       | G       | -0.1726 | 0.0277  | 4.90E-10  | Sun et al.       |            |
| rs9860285   | 3   | 49355374  | DOCK9               | DOCK9.14002              | T       | G       | -0.1406 | 0.0278  | 4.27E-07  | Sun et al.       |            |
| rs9860285   | 3   | 49355374  | TMPRSS11D           | TMPRSS11D                | T       | G       | -0.2009 | 0.0277  | 4.07E-13  | Sun et al.       |            |
| rs7432266   | 3   | 57673911  | COLGALT1            | COLGALT1.5               | T       | C       | 0.1368  | 0.0330  | 3.31E-05  | Sun et al.       |            |
| rs75072999  | 4   | 844781    | IDUA                | IDUA.3169                | T       | A       | G       | 0.1754  | 0.0429    | 4.27E-05         | Sun et al. |
| rs75072999  | 4   | 844781    | SSB                 | SSB.13526                | T       | A       | G       | -0.1761 | 0.0429    | 3.98E-05         | Sun et al. |
| rs6815946   | 4   | 995305    | IDUA                | IDUA.3169                | T       | C       | -0.3791 | 0.0336  | 1.58E-29  | Sun et al.       |            |
| rs115790973 | 4   | 996560    | IDUA                | IDUA.3169                | T       | C       | -0.3836 | 0.0339  | 1.02E-29  | Sun et al.       |            |
| rs11247975  | 4   | 1165130   | IDUA                | IDUA.3169                | T       | G       | -0.1459 | 0.0267  | 4.47E-08  | Sun et al.       |            |
| rs11538062  | 4   | 1165764   | DHX8                | DHX8.11601               | T       | C       | 0.1569  | 0.0357  | 1.10E-05  | Sun et al.       |            |
| rs11538062  | 4   | 1165764   | COX7A1              | COX7A1.8390              | T       | C       | 0.1570  | 0.0357  | 1.10E-05  | Sun et al.       |            |
| rs11538062  | 4   | 1165764   | IDUA                | IDUA.3169                | T       | C       | 0.2072  | 0.0356  | 6.03E-09  | Sun et al.       |            |
| rs6556919   | 5   | 95699865  | PCSK1               | PCSK1.13388              | A       | C       | 0.4622  | 0.0251  | 1.70E-75  | Sun et al.       |            |

|            |   |           |          |                  |   |         |        |          |            |
|------------|---|-----------|----------|------------------|---|---------|--------|----------|------------|
| rs1045706  | 5 | 108714298 | F8       | F8.13499.30.3 T  | C | 0.1039  | 0.0254 | 4.27E-05 | Sun et al. |
| rs6595440  | 5 | 122718736 | PGRMC2   | PGRMC2.868.1 C   | G | -0.1162 | 0.0250 | 3.47E-06 | Sun et al. |
| rs6595440  | 5 | 122718736 | LINGO1   | LINGO1.6620. C   | G | -0.1181 | 0.0250 | 2.34E-06 | Sun et al. |
| rs11958836 | 5 | 122738322 | PGRMC2   | PGRMC2.868.1 A   | G | -0.1181 | 0.0251 | 2.51E-06 | Sun et al. |
| rs11958836 | 5 | 122738322 | LINGO1   | LINGO1.6620. A   | G | -0.1210 | 0.0251 | 1.38E-06 | Sun et al. |
| rs2073531  | 6 | 26375256  | TAPBPL   | TAPBPL.6364 A    | G | -0.1828 | 0.0359 | 3.47E-07 | Sun et al. |
| rs2073531  | 6 | 26375256  | RACGAP1  | RACGAP1.13.1 A   | G | -0.1731 | 0.0359 | 1.41E-06 | Sun et al. |
| rs2073531  | 6 | 26375256  | C4A      | C4A.C4B.448.1 A  | G | 0.2023  | 0.0359 | 1.70E-08 | Sun et al. |
| rs2073531  | 6 | 26375256  | GRIA4    | GRIA4.10760. A   | G | 0.1982  | 0.0359 | 3.31E-08 | Sun et al. |
| rs2073531  | 6 | 26375256  | PRSS3    | PRSS3.3479.7 A   | G | -0.1659 | 0.0359 | 3.80E-06 | Sun et al. |
| rs2073531  | 6 | 26375256  | PDE4D    | PDE4D.5255.2 A   | G | 0.2286  | 0.0358 | 1.70E-10 | Sun et al. |
| rs2073531  | 6 | 26375256  | DEFB119  | DEFB119.134.1 A  | G | 0.1529  | 0.0359 | 2.09E-05 | Sun et al. |
| rs2073531  | 6 | 26375256  | MICB     | MICB.5102.55 A   | G | 0.3225  | 0.0356 | 1.32E-19 | Sun et al. |
| rs3757138  | 6 | 26376103  | C4A      | C4A.C4B.448.1 A  | G | 0.2023  | 0.0358 | 1.62E-08 | Sun et al. |
| rs3757138  | 6 | 26376103  | RACGAP1  | RACGAP1.13.1 A   | G | -0.1723 | 0.0359 | 1.55E-06 | Sun et al. |
| rs3757138  | 6 | 26376103  | PDE4D    | PDE4D.5255.2 A   | G | 0.2289  | 0.0358 | 1.55E-10 | Sun et al. |
| rs3757138  | 6 | 26376103  | GRIA4    | GRIA4.10760. A   | G | 0.1977  | 0.0358 | 3.39E-08 | Sun et al. |
| rs3757138  | 6 | 26376103  | MICB     | MICB.5102.55 A   | G | 0.3219  | 0.0356 | 1.38E-19 | Sun et al. |
| rs3757138  | 6 | 26376103  | PRSS3    | PRSS3.3479.7 A   | G | -0.1656 | 0.0358 | 3.80E-06 | Sun et al. |
| rs3757138  | 6 | 26376103  | TAPBPL   | TAPBPL.6364 A    | G | -0.1823 | 0.0358 | 3.63E-07 | Sun et al. |
| rs3757138  | 6 | 26376103  | DEFB119  | DEFB119.134.1 A  | G | 0.1529  | 0.0359 | 2.04E-05 | Sun et al. |
| rs56405707 | 6 | 27640246  | PRSS3    | PRSS3.3479.7 A   | G | 0.1987  | 0.0373 | 1.00E-07 | Sun et al. |
| rs56405707 | 6 | 27640246  | TAPBPL   | TAPBPL.6364 A    | G | 0.1559  | 0.0374 | 3.09E-05 | Sun et al. |
| rs56405707 | 6 | 27640246  | PDE4D    | PDE4D.5255.2 A   | G | -0.3010 | 0.0371 | 5.37E-16 | Sun et al. |
| rs56405707 | 6 | 27640246  | CD96     | CD96.9735.44 A   | G | -0.1773 | 0.0374 | 2.09E-06 | Sun et al. |
| rs56405707 | 6 | 27640246  | GRIA4    | GRIA4.10760. A   | G | -0.2549 | 0.0373 | 7.76E-12 | Sun et al. |
| rs56405707 | 6 | 27640246  | HLA-DQA2 | HLA.DQA2.77 A    | G | -0.1628 | 0.0374 | 1.35E-05 | Sun et al. |
| rs56405707 | 6 | 27640246  | RACGAP1  | RACGAP1.13.1 A   | G | 0.1821  | 0.0374 | 1.10E-06 | Sun et al. |
| rs56405707 | 6 | 27640246  | CRISP2   | CRISP2.9282.1 A  | G | -0.1585 | 0.0374 | 2.29E-05 | Sun et al. |
| rs56405707 | 6 | 27640246  | C4A      | C4A.C4B.448.1 A  | G | -0.2447 | 0.0373 | 5.25E-11 | Sun et al. |
| rs56405707 | 6 | 27640246  | MICB     | MICB.5102.55 A   | G | -0.3976 | 0.0369 | 4.17E-27 | Sun et al. |
| rs56405707 | 6 | 27640246  | DEFB119  | DEFB119.134.1 A  | G | -0.1910 | 0.0374 | 3.24E-07 | Sun et al. |
| rs200991   | 6 | 27815494  | IL19     | IL19.3035.80.1 A | C | -0.1342 | 0.0322 | 3.02E-05 | Sun et al. |
| rs200991   | 6 | 27815494  | GRIA4    | GRIA4.10760. A   | C | -0.1535 | 0.0321 | 1.74E-06 | Sun et al. |
| rs200991   | 6 | 27815494  | PDE4D    | PDE4D.5255.2 A   | C | -0.1939 | 0.0321 | 1.48E-09 | Sun et al. |
| rs200991   | 6 | 27815494  | DEFB119  | DEFB119.134.1 A  | C | -0.1377 | 0.0322 | 1.82E-05 | Sun et al. |
| rs200991   | 6 | 27815494  | MICB     | MICB.5102.55 A   | C | -0.2450 | 0.0320 | 1.74E-14 | Sun et al. |
| rs200991   | 6 | 27815494  | HLA-DQA2 | HLA.DQA2.77 A    | C | -0.1329 | 0.0322 | 3.55E-05 | Sun et al. |
| rs200991   | 6 | 27815494  | PRSS3    | PRSS3.3479.7 A   | C | 0.1324  | 0.0321 | 3.72E-05 | Sun et al. |
| rs200991   | 6 | 27815494  | PDIA5    | PDIA5.5593.1 A   | C | 0.1485  | 0.0321 | 3.80E-06 | Sun et al. |
| rs200991   | 6 | 27815494  | FN1      | FN1.3435.53.2 A  | C | -0.1384 | 0.0321 | 1.66E-05 | Sun et al. |
| rs200991   | 6 | 27815494  | HBEGF    | HBEGF.14094 A    | C | 0.1446  | 0.0321 | 6.76E-06 | Sun et al. |
| rs200991   | 6 | 27815494  | C4A      | C4A.C4B.448.1 A  | C | -0.1984 | 0.0321 | 6.03E-10 | Sun et al. |
| rs200991   | 6 | 27815494  | RACGAP1  | RACGAP1.13.1 A   | C | 0.1541  | 0.0321 | 1.58E-06 | Sun et al. |
| rs9986596  | 6 | 28219661  | MICB     | MICB.5102.55 A   | G | -0.2908 | 0.0330 | 1.23E-18 | Sun et al. |
| rs9986596  | 6 | 28219661  | CRISP2   | CRISP2.9282.1 A  | G | -0.1467 | 0.0333 | 1.05E-05 | Sun et al. |
| rs9986596  | 6 | 28219661  | GRIA4    | GRIA4.10760. A   | G | -0.1847 | 0.0332 | 2.69E-08 | Sun et al. |
| rs9986596  | 6 | 28219661  | C4A      | C4A.C4B.448.1 A  | G | -0.1845 | 0.0332 | 2.75E-08 | Sun et al. |
| rs9986596  | 6 | 28219661  | PDIA5    | PDIA5.5593.1 A   | G | 0.1435  | 0.0333 | 1.62E-05 | Sun et al. |
| rs9986596  | 6 | 28219661  | HBEGF    | HBEGF.14094 A    | G | 0.1455  | 0.0333 | 1.23E-05 | Sun et al. |
| rs9986596  | 6 | 28219661  | PDE4D    | PDE4D.5255.2 A   | G | -0.2289 | 0.0331 | 4.90E-12 | Sun et al. |

|            |   |          |          |                 |   |         |        |          |            |
|------------|---|----------|----------|-----------------|---|---------|--------|----------|------------|
| rs9986596  | 6 | 28219661 | DEFB119  | DEFB119.134: A  | G | -0.1521 | 0.0333 | 4.79E-06 | Sun et al. |
| rs9986596  | 6 | 28219661 | RACGAP1  | RACGAP1.13: A   | G | 0.1691  | 0.0332 | 3.63E-07 | Sun et al. |
| rs9986596  | 6 | 28219661 | PRSS3    | PRSS3.3479.7 A  | G | 0.1734  | 0.0332 | 1.74E-07 | Sun et al. |
| rs9986596  | 6 | 28219661 | AKT2     | AKT2.14685.1 A  | G | 0.1373  | 0.0333 | 3.72E-05 | Sun et al. |
| rs9986596  | 6 | 28219661 | C4B      | C4A.C4B.448: A  | G | -0.1845 | 0.0332 | 2.75E-08 | Sun et al. |
| rs853678   | 6 | 28297313 | DEFB119  | DEFB119.134: A  | T | -0.1507 | 0.0330 | 4.90E-06 | Sun et al. |
| rs853678   | 6 | 28297313 | MICB     | MICB.5102.55 A  | T | -0.2926 | 0.0327 | 3.47E-19 | Sun et al. |
| rs853678   | 6 | 28297313 | C4A      | C4A.C4B.448: A  | T | -0.1696 | 0.0329 | 2.63E-07 | Sun et al. |
| rs853678   | 6 | 28297313 | GRIA4    | GRIA4.10760. A  | T | -0.1749 | 0.0329 | 1.07E-07 | Sun et al. |
| rs853678   | 6 | 28297313 | PRSS3    | PRSS3.3479.7 A  | T | 0.1770  | 0.0329 | 7.24E-08 | Sun et al. |
| rs853678   | 6 | 28297313 | RACGAP1  | RACGAP1.13: A   | T | 0.1824  | 0.0329 | 2.95E-08 | Sun et al. |
| rs853678   | 6 | 28297313 | PDE4D    | PDE4D.5255.2 A  | T | -0.2312 | 0.0328 | 1.82E-12 | Sun et al. |
| rs853678   | 6 | 28297313 | CRISP2   | CRISP2.9282. A  | T | -0.1351 | 0.0330 | 4.17E-05 | Sun et al. |
| rs853678   | 6 | 28297313 | HBEGF    | HBEGF.14094 A   | T | 0.1402  | 0.0330 | 2.09E-05 | Sun et al. |
| rs2523753  | 6 | 29734727 | GRIA4    | GRIA4.10760. A  | G | -0.1029 | 0.0250 | 3.89E-05 | Sun et al. |
| rs2523753  | 6 | 29734727 | HLA-DQA2 | HLA.DQA2.77 A   | G | -0.1349 | 0.0250 | 6.31E-08 | Sun et al. |
| rs2523753  | 6 | 29734727 | TAPBPL   | TAPBPL.6364 A   | G | 0.1330  | 0.0250 | 9.77E-08 | Sun et al. |
| rs1061815  | 6 | 29913374 | DEFB119  | DEFB119.134: C  | G | 0.1796  | 0.0307 | 4.90E-09 | Sun et al. |
| rs1061815  | 6 | 29913374 | RACGAP1  | RACGAP1.13: C   | G | -0.1536 | 0.0307 | 5.75E-07 | Sun et al. |
| rs1061815  | 6 | 29913374 | PRSS3    | PRSS3.3479.7 C  | G | -0.1587 | 0.0307 | 2.29E-07 | Sun et al. |
| rs1061815  | 6 | 29913374 | PDE4D    | PDE4D.5255.2 C  | G | 0.2416  | 0.0306 | 2.63E-15 | Sun et al. |
| rs1061815  | 6 | 29913374 | GRIA4    | GRIA4.10760. C  | G | 0.2351  | 0.0306 | 1.48E-14 | Sun et al. |
| rs1061815  | 6 | 29913374 | C4A      | C4A.C4B.448: C  | G | 0.1860  | 0.0307 | 1.32E-09 | Sun et al. |
| rs1061815  | 6 | 29913374 | CD96     | CD96.9735.44 C  | G | 0.1920  | 0.0307 | 3.80E-10 | Sun et al. |
| rs1061815  | 6 | 29913374 | HLA-DQA2 | HLA.DQA2.77 C   | G | 0.1572  | 0.0307 | 3.16E-07 | Sun et al. |
| rs1061815  | 6 | 29913374 | MICB     | MICB.5102.55 C  | G | 0.2274  | 0.0306 | 1.07E-13 | Sun et al. |
| rs2517719  | 6 | 29916253 | NPTX1    | NPTX1.9256.7 C  | G | -0.1231 | 0.0261 | 2.40E-06 | Sun et al. |
| rs2517719  | 6 | 29916253 | ENTPD3   | ENTPD3.4436 C   | G | -0.1264 | 0.0261 | 1.32E-06 | Sun et al. |
| rs2517719  | 6 | 29916253 | GRB7     | GRB7.11281.6 C  | G | -0.1074 | 0.0261 | 3.89E-05 | Sun et al. |
| rs2517719  | 6 | 29916253 | TAPBPL   | TAPBPL.6364 C   | G | -0.2067 | 0.0260 | 1.70E-15 | Sun et al. |
| rs2517719  | 6 | 29916253 | CNDP2    | CNDP2.3192.5 C  | G | -0.1080 | 0.0261 | 3.55E-05 | Sun et al. |
| rs2517719  | 6 | 29916253 | LAYN     | LAYN.2635.6: C  | G | -0.1353 | 0.0261 | 2.19E-07 | Sun et al. |
| rs2517719  | 6 | 29916253 | C1QTNF9  | C1QTNF9.601 C   | G | -0.1192 | 0.0261 | 5.01E-06 | Sun et al. |
| rs2517719  | 6 | 29916253 | HLA-DQA2 | HLA.DQA2.77 C   | G | 0.1259  | 0.0261 | 1.41E-06 | Sun et al. |
| rs2517719  | 6 | 29916253 | AMELX    | AMELX.8578. C   | G | 0.1197  | 0.0261 | 4.57E-06 | Sun et al. |
| rs2517719  | 6 | 29916253 | TNFSF8   | TNFSF8.3421. C  | G | -0.1216 | 0.0261 | 3.24E-06 | Sun et al. |
| rs2517719  | 6 | 29916253 | RNMTL1   | RNMTL1.958: C   | G | -0.1085 | 0.0261 | 3.31E-05 | Sun et al. |
| rs2517719  | 6 | 29916253 | KCNE2    | KCNE2.10427 C   | G | 0.1148  | 0.0261 | 1.12E-05 | Sun et al. |
| rs2517719  | 6 | 29916253 | PIK3C2A  | PIK3C2A.140: C  | G | -0.1116 | 0.0261 | 1.95E-05 | Sun et al. |
| rs2517719  | 6 | 29916253 | CTF1     | CTF1.2889.37. C | G | -0.1081 | 0.0261 | 3.55E-05 | Sun et al. |
| rs36019691 | 6 | 29942384 | LRRIC15  | LRRIC15.6557 T  | C | -0.1126 | 0.0276 | 4.37E-05 | Sun et al. |
| rs36019691 | 6 | 29942384 | IGFL4    | IGFL4.6353.6: T | C | -0.1373 | 0.0275 | 6.17E-07 | Sun et al. |
| rs36019691 | 6 | 29942384 | IGL      | IGHE.IGK.IGL T  | C | 0.1153  | 0.0276 | 2.88E-05 | Sun et al. |
| rs36019691 | 6 | 29942384 | AMELX    | AMELX.8578. T   | C | -0.1272 | 0.0275 | 3.89E-06 | Sun et al. |
| rs36019691 | 6 | 29942384 | SCGB1C1  | SCGB1C1.596 T   | C | -0.1330 | 0.0275 | 1.38E-06 | Sun et al. |
| rs36019691 | 6 | 29942384 | PILRA    | PILRA.8683.1 T  | C | -0.1192 | 0.0276 | 1.51E-05 | Sun et al. |
| rs36019691 | 6 | 29942384 | TAPBPL   | TAPBPL.6364 T   | C | 0.1870  | 0.0274 | 9.55E-12 | Sun et al. |
| rs36019691 | 6 | 29942384 | CTBS     | CTBS.6115.40 T  | C | -0.1241 | 0.0275 | 6.61E-06 | Sun et al. |
| rs36019691 | 6 | 29942384 | AMBN     | AMBN.6522.5 T   | C | -0.1397 | 0.0275 | 3.89E-07 | Sun et al. |
| rs36019691 | 6 | 29942384 | HLA-DQA2 | HLA.DQA2.77 T   | C | -0.1457 | 0.0275 | 1.20E-07 | Sun et al. |
| rs36019691 | 6 | 29942384 | IGHE     | IGHE.IGK.IGL T  | C | 0.1153  | 0.0276 | 2.88E-05 | Sun et al. |

|             |   |           |           |                 |   |         |        |          |            |
|-------------|---|-----------|-----------|-----------------|---|---------|--------|----------|------------|
| rs35835721  | 6 | 29942386  | TAPBPL    | TAPBPL.6364 T   | G | 0.1884  | 0.0274 | 6.03E-12 | Sun et al. |
| rs35835721  | 6 | 29942386  | AMBN      | AMBN.6522.5 T   | G | -0.1415 | 0.0275 | 2.57E-07 | Sun et al. |
| rs35835721  | 6 | 29942386  | NPTX1     | NPTX1.9256.7 T  | G | 0.1122  | 0.0275 | 4.47E-05 | Sun et al. |
| rs35835721  | 6 | 29942386  | CTBS      | CTBS.6115.40 T  | G | -0.1260 | 0.0275 | 4.57E-06 | Sun et al. |
| rs35835721  | 6 | 29942386  | SCGB1C1   | SCGB1C1.596 T   | G | -0.1350 | 0.0275 | 8.91E-07 | Sun et al. |
| rs35835721  | 6 | 29942386  | LRRC15    | LRRC15.6557 T   | G | -0.1118 | 0.0275 | 4.79E-05 | Sun et al. |
| rs35835721  | 6 | 29942386  | IGHE      | IGHE.IGK.IGL T  | G | 0.1147  | 0.0275 | 3.02E-05 | Sun et al. |
| rs35835721  | 6 | 29942386  | HLA-DQA2  | HLA.DQA2.77 T   | G | -0.1453 | 0.0275 | 1.20E-07 | Sun et al. |
| rs35835721  | 6 | 29942386  | PILRA     | PILRA.8683.1 T  | G | -0.1197 | 0.0275 | 1.35E-05 | Sun et al. |
| rs35835721  | 6 | 29942386  | IGFL4     | IGFL4.6353.6 T  | G | -0.1388 | 0.0275 | 4.37E-07 | Sun et al. |
| rs35835721  | 6 | 29942386  | AMELX     | AMELX.8578. T   | G | -0.1268 | 0.0275 | 3.98E-06 | Sun et al. |
| rs35835721  | 6 | 29942386  | IGK       | IGHE.IGK.IGL T  | G | 0.1147  | 0.0275 | 3.02E-05 | Sun et al. |
| rs2285800   | 6 | 30257497  | PRSS3     | PRSS3.3479.7 C  | G | 0.1154  | 0.0284 | 4.90E-05 | Sun et al. |
| rs2285800   | 6 | 30257497  | HLA-DQA2  | HLA.DQA2.77 C   | G | -0.1375 | 0.0284 | 1.29E-06 | Sun et al. |
| rs186215159 | 6 | 35058115  | LGALS7    | LGALS7.9400 A   | G | -0.3814 | 0.0887 | 1.70E-05 | Sun et al. |
| rs186215159 | 6 | 35058115  | TLL1      | TLL1.6383.90. A | G | -0.3892 | 0.0887 | 1.15E-05 | Sun et al. |
| rs4715631   | 6 | 56417545  | CBX7      | CBX7.13027.2 T  | C | 0.1127  | 0.0270 | 3.02E-05 | Sun et al. |
| rs12660627  | 6 | 74504224  | CD109     | CD109.3290.5 A  | G | -0.4112 | 0.0236 | 8.51E-68 | Sun et al. |
| rs7795470   | 7 | 27286383  | NCAM1     | NCAM1.7746. T   | C | 0.4119  | 0.0935 | 1.07E-05 | Sun et al. |
| rs28680963  | 7 | 99905475  | HTN1      | HTN1.10608.9 C  | G | -0.3607 | 0.0308 | 1.05E-31 | Sun et al. |
| rs7792525   | 7 | 99972122  | HTN1      | HTN1.10608.9 A  | G | -0.3695 | 0.0360 | 9.33E-25 | Sun et al. |
| rs6962151   | 7 | 100028484 | HTN1      | HTN1.10608.9 T  | C | -0.3254 | 0.0306 | 1.74E-26 | Sun et al. |
| rs2979247   | 8 | 8888948   | RETN      | RETN.3046.31 A  | G | 0.1078  | 0.0253 | 2.14E-05 | Sun et al. |
| rs4841497   | 8 | 10985140  | GPLD1     | GPLD1.9500.5 A  | G | 0.1066  | 0.0252 | 2.29E-05 | Sun et al. |
| rs2645429   | 8 | 11660051  | CTSB      | CTSB.3061.61 A  | G | 0.3116  | 0.0277 | 2.14E-29 | Sun et al. |
| rs1047643   | 8 | 11660362  | CTSB      | CTSB.3061.61 T  | C | 0.1880  | 0.0325 | 7.08E-09 | Sun et al. |
| rs8898      | 8 | 11702542  | CTSB      | CTSB.3061.61 T  | C | 0.1544  | 0.0258 | 2.34E-09 | Sun et al. |
| rs2005617   | 9 | 33791164  | KIAA1161  | KIAA1161.80 T   | C | 0.1122  | 0.0252 | 8.32E-06 | Sun et al. |
| rs307658    | 9 | 33941759  | KIAA1161  | KIAA1161.80 T   | C | -0.1142 | 0.0252 | 5.89E-06 | Sun et al. |
| rs10821035  | 9 | 95636075  | ASPN      | ASPN.6451.64 T  | C | 0.1747  | 0.0255 | 7.24E-12 | Sun et al. |
| rs10821035  | 9 | 95636075  | CD34      | CD34.9023.9 T   | C | 0.1504  | 0.0255 | 3.89E-09 | Sun et al. |
| rs41302673  | 9 | 136270538 | FLT4      | FLT4.2358.19. T | G | 0.3697  | 0.0425 | 3.39E-18 | Sun et al. |
| rs41302673  | 9 | 136270538 | LIFR      | LIFR.5837.49. T | G | 0.1946  | 0.0429 | 5.62E-06 | Sun et al. |
| rs41302673  | 9 | 136270538 | ISLR2     | ISLR2.13124.2 T | G | 0.3046  | 0.0427 | 9.33E-13 | Sun et al. |
| rs41302673  | 9 | 136270538 | IL3RA     | IL3RA.13744. T  | G | 0.6166  | 0.0416 | 1.20E-49 | Sun et al. |
| rs41302673  | 9 | 136270538 | TIE1      | TIE1.2844.53. T | G | -0.1745 | 0.0429 | 4.68E-05 | Sun et al. |
| rs41302673  | 9 | 136270538 | ADAMTS13  | ADAMTS13.3 T    | G | -0.1768 | 0.0429 | 3.72E-05 | Sun et al. |
| rs41302673  | 9 | 136270538 | SELP      | SELP.4154.57. T | G | 0.3042  | 0.0427 | 1.02E-12 | Sun et al. |
| rs41302673  | 9 | 136270538 | QSOX2     | QSOX2.8397.1 T  | G | -0.6454 | 0.0415 | 1.55E-54 | Sun et al. |
| rs41302673  | 9 | 136270538 | TPST2     | TPST2.8024.6 T  | G | -0.2465 | 0.0428 | 8.32E-09 | Sun et al. |
| rs41302673  | 9 | 136270538 | ICAM2     | ICAM2.5486.7 T  | G | 0.2029  | 0.0428 | 2.19E-06 | Sun et al. |
| rs41302673  | 9 | 136270538 | C1GALT1C1 | C1GALT1C1.5 T   | G | -0.4113 | 0.0424 | 3.02E-22 | Sun et al. |
| rs41302673  | 9 | 136270538 | GOLM1     | GOLM1.8983. T   | G | -0.3914 | 0.0424 | 2.82E-20 | Sun et al. |
| rs41302673  | 9 | 136270538 | ICAM5     | ICAM5.5124.6 T  | G | 0.2040  | 0.0429 | 1.95E-06 | Sun et al. |
| rs41302673  | 9 | 136270538 | ABO       | ABO.9253.52. T  | G | -0.7920 | 0.0407 | 3.16E-84 | Sun et al. |
| rs41302673  | 9 | 136270538 | KDR       | KDR.3651.50. T  | G | 0.3701  | 0.0425 | 3.09E-18 | Sun et al. |
| rs41302673  | 9 | 136270538 | ICAM5     | ICAM5.8245.2 T  | G | 0.2957  | 0.0427 | 4.27E-12 | Sun et al. |
| rs41302673  | 9 | 136270538 | SELE      | SELE.3470.1.2 T | G | 0.8151  | 0.0406 | 1.00E-89 | Sun et al. |
| rs41302673  | 9 | 136270538 | CHST15    | CHST15.4469. T  | G | 0.1795  | 0.0429 | 2.82E-05 | Sun et al. |
| rs41302673  | 9 | 136270538 | FAM177A1  | FAM177A1.8 C    | G | 0.1916  | 0.0429 | 7.94E-06 | Sun et al. |
| rs41302673  | 9 | 136270538 | TLR4      | TLR4.LY96.3 C   | G | 0.2105  | 0.0428 | 8.91E-07 | Sun et al. |

|            |   |           |           |                 |   |         |        |           |            |
|------------|---|-----------|-----------|-----------------|---|---------|--------|-----------|------------|
| rs41302673 | 9 | 136270538 | MET       | MET.2837.3.2 T  | G | 0.2372  | 0.0428 | 2.95E-08  | Sun et al. |
| rs41302673 | 9 | 136270538 | MBL2      | MBL2.3000.6c T  | G | -0.2160 | 0.0428 | 4.57E-07  | Sun et al. |
| rs41302673 | 9 | 136270538 | ADGRF5    | ADGRF5.6409 T   | G | 0.4751  | 0.0422 | 1.95E-29  | Sun et al. |
| rs41302673 | 9 | 136270538 | CDH5      | CDH5.2819.23 T  | G | 0.1812  | 0.0429 | 2.34E-05  | Sun et al. |
| rs41302673 | 9 | 136270538 | ICAM1     | ICAM1.4342.1 T  | G | 0.1919  | 0.0429 | 7.59E-06  | Sun et al. |
| rs41302673 | 9 | 136270538 | GLCE      | GLCE.7808.5c T  | G | -0.3592 | 0.0425 | 3.09E-17  | Sun et al. |
| rs41302673 | 9 | 136270538 | DPEP2     | DPEP2.8327.2 T  | G | 0.1824  | 0.0429 | 2.09E-05  | Sun et al. |
| rs41302673 | 9 | 136270538 | F8        | F8.13499.30.3 T | G | -0.3789 | 0.0425 | 4.57E-19  | Sun et al. |
| rs41302673 | 9 | 136270538 | INSR      | INSR.3448.13. T | G | 0.3789  | 0.0425 | 4.68E-19  | Sun et al. |
| rs41302673 | 9 | 136270538 | B3GNT2    | B3GNT2.7980 T   | G | -0.2202 | 0.0428 | 2.75E-07  | Sun et al. |
| rs41302673 | 9 | 136270538 | KIN       | KIN.14643.27. T | G | 0.2408  | 0.0428 | 1.82E-08  | Sun et al. |
| rs41302673 | 9 | 136270538 | FAM3D     | FAM3D.13102 T   | G | -0.4777 | 0.0422 | 9.77E-30  | Sun et al. |
| rs41302673 | 9 | 136270538 | CD209     | CD209.3029.5 T  | G | -0.5027 | 0.0421 | 7.24E-33  | Sun et al. |
| rs41302673 | 9 | 136270538 | SEMA6A    | SEMA6A.794c T   | G | 0.1888  | 0.0429 | 1.07E-05  | Sun et al. |
| rs739468   | 9 | 136326248 | B4GALT2   | B4GALT2.959 T   | G | 0.1542  | 0.0360 | 1.82E-05  | Sun et al. |
| rs739468   | 9 | 136326248 | B3GNT2    | B3GNT2.7980 T   | G | 0.2432  | 0.0358 | 1.12E-11  | Sun et al. |
| rs739468   | 9 | 136326248 | ICAM5     | ICAM5.5124.6 T  | G | -0.2064 | 0.0359 | 8.71E-09  | Sun et al. |
| rs739468   | 9 | 136326248 | KDR       | KDR.3651.50c T  | G | -0.3996 | 0.0354 | 1.32E-29  | Sun et al. |
| rs739468   | 9 | 136326248 | FAM20B    | FAM20B.7198 T   | G | 0.1903  | 0.0359 | 1.15E-07  | Sun et al. |
| rs739468   | 9 | 136326248 | ABO       | ABO.9253.52c T  | G | 0.7955  | 0.0333 | 3.80E-126 | Sun et al. |
| rs739468   | 9 | 136326248 | IL6ST     | IL6ST.2620.4c T | G | -0.1518 | 0.0360 | 2.40E-05  | Sun et al. |
| rs739468   | 9 | 136326248 | TLR4      | TLR4.LY96.3c T  | G | -0.1989 | 0.0359 | 3.02E-08  | Sun et al. |
| rs739468   | 9 | 136326248 | CCL28     | CCL28.2890.5 T  | G | -0.1538 | 0.0360 | 1.91E-05  | Sun et al. |
| rs739468   | 9 | 136326248 | B4GALT1   | B4GALT1.133 T   | G | 0.1647  | 0.0359 | 4.57E-06  | Sun et al. |
| rs739468   | 9 | 136326248 | ADGRF5    | ADGRF5.6409 T   | G | -0.4829 | 0.0350 | 3.24E-43  | Sun et al. |
| rs739468   | 9 | 136326248 | CDH12     | CDH12.10701 T   | G | -0.1532 | 0.0360 | 2.04E-05  | Sun et al. |
| rs739468   | 9 | 136326248 | TIE1      | TIE1.2844.53c T | G | 0.1811  | 0.0359 | 4.68E-07  | Sun et al. |
| rs739468   | 9 | 136326248 | LIFR      | LIFR.5837.49c T | G | -0.1901 | 0.0359 | 1.20E-07  | Sun et al. |
| rs739468   | 9 | 136326248 | ICAM2     | ICAM2.5486.7 T  | G | -0.2171 | 0.0359 | 1.41E-09  | Sun et al. |
| rs739468   | 9 | 136326248 | QSOX2     | QSOX2.8397.1 T  | G | 0.6515  | 0.0342 | 9.55E-81  | Sun et al. |
| rs739468   | 9 | 136326248 | TPST2     | TPST2.8024.6 T  | G | 0.2252  | 0.0358 | 3.39E-10  | Sun et al. |
| rs739468   | 9 | 136326248 | FLT4      | FLT4.2358.19. T | G | -0.3282 | 0.0356 | 2.88E-20  | Sun et al. |
| rs739468   | 9 | 136326248 | SELP      | SELP.4154.57. T | G | -0.3119 | 0.0357 | 2.19E-18  | Sun et al. |
| rs739468   | 9 | 136326248 | SELE      | SELE.3470.1c T  | G | -0.8174 | 0.0331 | 2.04E-134 | Sun et al. |
| rs739468   | 9 | 136326248 | C1GALT1C1 | C1GALT1C1.5 T   | G | 0.4425  | 0.0352 | 3.55E-36  | Sun et al. |
| rs739468   | 9 | 136326248 | CDH15     | CDH15.5410.5 T  | G | -0.1539 | 0.0359 | 1.86E-05  | Sun et al. |
| rs739468   | 9 | 136326248 | INSR      | INSR.3448.13. T | G | -0.3417 | 0.0356 | 7.24E-22  | Sun et al. |
| rs739468   | 9 | 136326248 | F8        | F8.13499.30.3 T | G | 0.3750  | 0.0355 | 3.98E-26  | Sun et al. |
| rs739468   | 9 | 136326248 | MBL2      | MBL2.3000.6c T  | G | 0.2320  | 0.0358 | 9.55E-11  | Sun et al. |
| rs739468   | 9 | 136326248 | ISLR2     | ISLR2.13124.2 T | G | -0.2935 | 0.0357 | 2.00E-16  | Sun et al. |
| rs739468   | 9 | 136326248 | DPEP2     | DPEP2.8327.2 T  | G | -0.1487 | 0.0360 | 3.55E-05  | Sun et al. |
| rs739468   | 9 | 136326248 | GOLM1     | GOLM1.8983. T   | G | 0.3780  | 0.0354 | 1.48E-26  | Sun et al. |
| rs739468   | 9 | 136326248 | ICAM1     | ICAM1.4342.1 T  | G | -0.1722 | 0.0359 | 1.66E-06  | Sun et al. |
| rs739468   | 9 | 136326248 | SEMA6A    | SEMA6A.794c T   | G | -0.1675 | 0.0359 | 3.16E-06  | Sun et al. |
| rs739468   | 9 | 136326248 | FAM3D     | FAM3D.13102 T   | G | 0.5037  | 0.0350 | 5.25E-47  | Sun et al. |
| rs739468   | 9 | 136326248 | THSD1     | THSD1.5621.6 T  | G | -0.2338 | 0.0358 | 6.76E-11  | Sun et al. |
| rs739468   | 9 | 136326248 | KIN       | KIN.14643.27. T | G | -0.2135 | 0.0359 | 2.63E-09  | Sun et al. |
| rs739468   | 9 | 136326248 | ADAMTS13  | ADAMTS13.3 T    | G | 0.1900  | 0.0359 | 1.20E-07  | Sun et al. |
| rs739468   | 9 | 136326248 | ICAM5     | ICAM5.8245.2 T  | G | -0.2808 | 0.0357 | 3.80E-15  | Sun et al. |
| rs739468   | 9 | 136326248 | IL3RA     | IL3RA.13744c T  | G | -0.6081 | 0.0345 | 1.10E-69  | Sun et al. |
| rs739468   | 9 | 136326248 | MET       | MET.2837.3.2 T  | G | -0.2186 | 0.0359 | 1.07E-09  | Sun et al. |

|             |    |           |          |                 |   |         |        |          |            |
|-------------|----|-----------|----------|-----------------|---|---------|--------|----------|------------|
| rs739468    | 9  | 136326248 | CHST15   | CHST15.4469.T   | G | -0.1720 | 0.0359 | 1.70E-06 | Sun et al. |
| rs739468    | 9  | 136326248 | GLCE     | GLCE.7808.5.T   | G | 0.3822  | 0.0354 | 3.98E-27 | Sun et al. |
| rs739468    | 9  | 136326248 | CD209    | CD209.3029.5 T  | G | 0.5296  | 0.0349 | 4.07E-52 | Sun et al. |
| rs739468    | 9  | 136326248 | FAM3B    | FAM3B.9177.1T   | G | 0.1855  | 0.0359 | 2.40E-07 | Sun et al. |
| rs739468    | 9  | 136326248 | LY96     | TLR4.LY96.36T   | G | -0.1989 | 0.0359 | 3.02E-08 | Sun et al. |
| rs1838062   | 10 | 54485449  | MBL2     | MBL2.3000.66A   | G | -0.3540 | 0.0281 | 2.40E-36 | Sun et al. |
| rs10887869  | 10 | 82194689  | FAM213A  | FAM213A.134A    | G | 0.1504  | 0.0247 | 1.20E-09 | Sun et al. |
| rs12260218  | 10 | 94942669  | SYTL4    | SYTL4.11563.T   | C | -0.1031 | 0.0247 | 3.02E-05 | Sun et al. |
| rs2421013   | 10 | 124089036 | MDK      | MDK.2911.27.A   | G | 0.1006  | 0.0246 | 4.27E-05 | Sun et al. |
| rs6585816   | 10 | 124101578 | TAGLN    | TAGLN.9756.1T   | G | 0.1241  | 0.0301 | 3.72E-05 | Sun et al. |
| rs273605    | 11 | 30965855  | RFFL     | RFFL.14186.1A   | T | -0.1158 | 0.0267 | 1.41E-05 | Sun et al. |
| rs273605    | 11 | 30965855  | NISCH    | NISCH.12738.A   | T | -0.1121 | 0.0267 | 2.69E-05 | Sun et al. |
| rs174537    | 11 | 61552680  | MET      | MET.2837.3.2 T  | G | 0.1203  | 0.0258 | 3.16E-06 | Sun et al. |
| rs174537    | 11 | 61552680  | IRF1     | IRF1.10351.51 T | G | -0.1106 | 0.0258 | 1.82E-05 | Sun et al. |
| rs174537    | 11 | 61552680  | FAM20B   | FAM20B.7198T    | G | 0.1057  | 0.0258 | 4.27E-05 | Sun et al. |
| rs174537    | 11 | 61552680  | HAVCR2   | HAVCR2.7157T    | G | 0.1314  | 0.0258 | 3.47E-07 | Sun et al. |
| rs174537    | 11 | 61552680  | SLC9B2   | SLC9B2.9088.T   | G | -0.1074 | 0.0258 | 3.24E-05 | Sun et al. |
| rs174537    | 11 | 61552680  | TBCA     | TBCA.12501.1T   | G | -0.1147 | 0.0258 | 8.71E-06 | Sun et al. |
| rs4246215   | 11 | 61564299  | TBCA     | TBCA.12501.1T   | G | -0.1166 | 0.0256 | 5.25E-06 | Sun et al. |
| rs4246215   | 11 | 61564299  | HAVCR2   | HAVCR2.7157T    | G | 0.1272  | 0.0256 | 6.76E-07 | Sun et al. |
| rs4246215   | 11 | 61564299  | IRF1     | IRF1.10351.51 T | G | -0.1053 | 0.0256 | 3.98E-05 | Sun et al. |
| rs4246215   | 11 | 61564299  | S100A13  | S100A13.7223T   | G | -0.1064 | 0.0256 | 3.31E-05 | Sun et al. |
| rs4246215   | 11 | 61564299  | SLC9B2   | SLC9B2.9088.T   | G | -0.1041 | 0.0256 | 4.90E-05 | Sun et al. |
| rs4246215   | 11 | 61564299  | MET      | MET.2837.3.2 T  | G | 0.1169  | 0.0256 | 5.01E-06 | Sun et al. |
| rs1841964   | 12 | 28343033  | PTHLH    | PTHLH.2962.5A   | G | 0.1777  | 0.0281 | 2.45E-10 | Sun et al. |
| rs4760610   | 12 | 48418225  | COL1A1   | COL1A1.1114 T   | C | 0.1300  | 0.0285 | 5.25E-06 | Sun et al. |
| rs7975791   | 12 | 49413486  | PSMD7    | PSMD7.3898.7T   | C | -0.2638 | 0.0617 | 1.91E-05 | Sun et al. |
| rs11057192  | 12 | 123693420 | MAGEA3   | MAGEA3.125 T    | C | 0.1236  | 0.0302 | 4.17E-05 | Sun et al. |
| rs9557132   | 13 | 99724279  | NFASC    | NFASC.7179.6C   | G | -0.1373 | 0.0305 | 6.92E-06 | Sun et al. |
| rs9557132   | 13 | 99724279  | MFAP4    | MFAP4.5636.1C   | G | -0.1386 | 0.0305 | 5.62E-06 | Sun et al. |
| rs9557132   | 13 | 99724279  | CACNA2D3 | CACNA2D3.8 C    | G | -0.1326 | 0.0305 | 1.38E-05 | Sun et al. |
| rs3181248   | 14 | 24808168  | KIR2DL5A | KIR2DL5A.77 A   | G | 0.1041  | 0.0251 | 3.31E-05 | Sun et al. |
| rs2273154   | 14 | 35433187  | FAM177A1 | FAM177A1.8C T   | C | -0.1800 | 0.0308 | 5.25E-09 | Sun et al. |
| rs28384418  | 14 | 35452126  | FAM177A1 | FAM177A1.8C A   | C | -0.1917 | 0.0274 | 2.40E-12 | Sun et al. |
| rs61217816  | 14 | 95651047  | FAM107B  | FAM107B.477 T   | C | -0.1811 | 0.0433 | 2.88E-05 | Sun et al. |
| rs61217816  | 14 | 95651047  | COL1A1   | COL1A1.1114 T   | C | -0.1965 | 0.0433 | 5.62E-06 | Sun et al. |
| rs3814816   | 14 | 95651765  | COL1A1   | COL1A1.1114 A   | G | 0.2023  | 0.0432 | 2.82E-06 | Sun et al. |
| rs4900592   | 14 | 104177098 | NETO1    | NETO1.5639.4T   | G | 0.1095  | 0.0267 | 4.17E-05 | Sun et al. |
| rs4900592   | 14 | 104177098 | NPTX2    | NPTX2.6521.3T   | G | 0.1086  | 0.0267 | 4.90E-05 | Sun et al. |
| rs4900592   | 14 | 104177098 | PGM1     | PGM1.9173.21T   | G | -0.1122 | 0.0267 | 2.69E-05 | Sun et al. |
| rs2295146   | 14 | 104199356 | NPTX2    | NPTX2.6521.3T   | C | 0.1072  | 0.0255 | 2.57E-05 | Sun et al. |
| rs12050772  | 15 | 51544871  | CTSH     | CTSH.8465.52 T  | G | 0.1055  | 0.0253 | 3.09E-05 | Sun et al. |
| rs8031179   | 15 | 65952034  | IGDCC4   | IGDCC4.9793.T   | C | 0.1034  | 0.0247 | 2.88E-05 | Sun et al. |
| rs112865841 | 16 | 434326    | HBZ      | HBZ.6919.3.3 T  | G | -0.2660 | 0.0309 | 7.41E-18 | Sun et al. |
| rs1420580   | 16 | 51164608  | TIMP4    | TIMP4.6462.1.T  | C | 0.1180  | 0.0261 | 6.46E-06 | Sun et al. |
| rs61733768  | 16 | 67213950  | TPPP2    | TPPP2.12800.7A  | G | -0.4251 | 0.0749 | 1.38E-08 | Sun et al. |
| rs8053031   | 16 | 67298163  | TPPP2    | TPPP2.12800.7T  | G | 0.4368  | 0.0720 | 1.35E-09 | Sun et al. |
| rs143837268 | 16 | 67654677  | TPPP2    | TPPP2.12800.7T  | C | -0.4907 | 0.0947 | 2.24E-07 | Sun et al. |
| rs118016432 | 16 | 67806696  | TPPP2    | TPPP2.12800.7T  | C | 0.3161  | 0.0714 | 9.33E-06 | Sun et al. |
| rs4450459   | 17 | 7396617   | SAT2     | SAT2.12524.1A   | G | -0.2802 | 0.0688 | 4.68E-05 | Sun et al. |
| rs4791806   | 17 | 7729184   | CCL3     | CCL3.3040.59 A  | G | -0.1406 | 0.0324 | 1.45E-05 | Sun et al. |



|            |    |           |          |                 |   |         |        |           |            |            |
|------------|----|-----------|----------|-----------------|---|---------|--------|-----------|------------|------------|
| rs4791806  | 17 | 7729184   | IBSP     | IBSP.3415.61. A | G | 0.1342  | 0.0324 | 3.47E-05  | Sun et al. |            |
| rs55809496 | 17 | 7759477   | MSRA     | MSRA.7137.8. A  | C | 0.1130  | 0.0251 | 6.76E-06  | Sun et al. |            |
| rs62623385 | 17 | 7847837   | SNX1     | SNX1.8807.13 A  | T | -0.2927 | 0.0710 | 3.80E-05  | Sun et al. |            |
| rs62066870 | 17 | 20063758  | SPACA3   | SPACA3.8076 A   | C | 0.1245  | 0.0254 | 9.77E-07  | Sun et al. |            |
| rs4792891  | 17 | 43973498  | DYRK3    | DYRK3.4359.4 T  | G | -0.1060 | 0.0259 | 4.27E-05  | Sun et al. |            |
| rs4792891  | 17 | 43973498  | COA3     | COA3.7888.58 T  | G | -0.1080 | 0.0259 | 3.09E-05  | Sun et al. |            |
| rs4792891  | 17 | 43973498  | CDH15    | CDH15.5410.5 T  | G | -0.1119 | 0.0259 | 1.55E-05  | Sun et al. |            |
| rs4792891  | 17 | 43973498  | ADCYAP1  | ADCYAP1.451 T   | G | -0.1147 | 0.0259 | 9.33E-06  | Sun et al. |            |
| rs4792891  | 17 | 43973498  | CDC42BPB | CDC42BPB.36 T   | G | -0.1190 | 0.0259 | 4.27E-06  | Sun et al. |            |
| rs4792891  | 17 | 43973498  | ASIC4    | ASIC4.6951.26 T | G | -0.1094 | 0.0259 | 2.40E-05  | Sun et al. |            |
| rs1881193  | 17 | 44248769  | OPALIN   | OPALIN.7736. T  | C | -0.1175 | 0.0288 | 4.57E-05  | Sun et al. |            |
| rs34587622 | 17 | 75398498  | VRK1     | VRK1.12553.5 T  | C | -0.1895 | 0.0400 | 2.19E-06  | Sun et al. |            |
| rs34587622 | 17 | 75398498  | KIF23    | KIF23.5228.25 T | C | -0.1815 | 0.0400 | 5.75E-06  | Sun et al. |            |
| rs3180287  | 19 | 804396    | IL1R1    | IL1R1.2991.9. T | C | -0.1457 | 0.0359 | 4.90E-05  | Sun et al. |            |
| rs3180287  | 19 | 804396    | EPHB6    | EPHB6.9261.1 T  | C | -0.1464 | 0.0359 | 4.47E-05  | Sun et al. |            |
| rs3180287  | 19 | 804396    | PTPRD    | PTPRD.9296.1 T  | C | -0.1502 | 0.0359 | 2.82E-05  | Sun et al. |            |
| rs3180287  | 19 | 804396    | UNC5D    | UNC5D.5140. T   | C | -0.1746 | 0.0358 | 1.10E-06  | Sun et al. |            |
| rs3180287  | 19 | 804396    | CNTNAP2  | CNTNAP2.696 T   | C | -0.1766 | 0.0358 | 8.32E-07  | Sun et al. |            |
| rs3180287  | 19 | 804396    | EFNA5    | EFNA5.2615.6 T  | C | -0.1545 | 0.0359 | 1.66E-05  | Sun et al. |            |
| rs3180287  | 19 | 804396    | LRIG3    | LRIG3.3322.5 T  | C | -0.1605 | 0.0359 | 7.59E-06  | Sun et al. |            |
| rs291700   | 20 | 31981849  | LRIT3    | LRIT3.11534.6 T | C | -0.1123 | 0.0266 | 2.40E-05  | Sun et al. |            |
| rs291700   | 20 | 31981849  | ASIP     | ASIP.5676.54. T | C | 0.1980  | 0.0264 | 6.61E-14  | Sun et al. |            |
| rs2295354  | 20 | 33356541  | ASIP     | ASIP.5676.54. T | C | 0.1274  | 0.0250 | 3.47E-07  | Sun et al. |            |
| rs8501     | 20 | 33590584  | ASIP     | ASIP.5676.54. T | C | 0.1306  | 0.0320 | 4.37E-05  | Sun et al. |            |
| rs6007010  | 22 | 45782903  | TAPBP    | TAPBP.12378. T  | C | 0.1085  | 0.0260 | 2.95E-05  | Sun et al. |            |
| rs28379706 | 22 | 50728062  | PLXNB2   | PLXNB2.9216 T   | C | -0.5312 | 0.0233 | 4.47E-115 | Sun et al. |            |
| rs28455041 | 22 | 50731903  | PLXNB2   | PLXNB2.9216 T   | C | -0.4863 | 0.0249 | 1.15E-84  | Sun et al. |            |
| rs2230471  | 1  | 172411496 | CD14     | CD14            | G | A       | 0.1320 | 0.0250    | 1.76E-07   | Yao et al. |
| rs916365   | 1  | 172453953 | CD14     | CD14            | G | T       | 0.1250 | 0.0250    | 6.68E-07   | Yao et al. |
| rs41302673 | 9  | 136270538 | MCAM     | MCAM            | T | G       | 0.2290 | 0.0440    | 1.76E-07   | Yao et al. |
| rs41302673 | 9  | 136270538 | IL6ST    | sGP130          | T | G       | 0.3060 | 0.0440    | 2.59E-12   | Yao et al. |
| rs41302673 | 9  | 136270538 | SELP     | GMP140          | T | G       | 0.5910 | 0.0440    | 2.61E-41   | Yao et al. |
| rs41302673 | 9  | 136270538 | ICAM1    | sICAM1          | T | G       | 0.4690 | 0.0440    | 6.62E-27   | Yao et al. |
| rs739468   | 9  | 136326248 | ICAM1    | sICAM1          | G | T       | 0.2320 | 0.0260    | 1.58E-19   | Yao et al. |
| rs739468   | 9  | 136326248 | IL6ST    | sGP130          | G | T       | 0.1440 | 0.0260    | 2.12E-08   | Yao et al. |
| rs739468   | 9  | 136326248 | SELP     | GMP140          | G | T       | 0.3190 | 0.0260    | 3.82E-35   | Yao et al. |
